# Supplementary material for: Genome-wide analysis of circular RNAs in goat skin fibroblast cells in response to Orf virus infection
Source: PeerJ. 2019 Jan 22;7:e6267. doi: 10.7717/peerj.6267 (PMC6346991; doi:10.7717/peerj.6267)
Supplement: Table S2 [file peerj-07-6267-s004.xlsx]

## Sheet: Sheet1
Table S2: Candidate circRNAs(back-spliced reads≥1)detected in at least one sample of GSF or OV group.
Accession	circRNA_size	chr	start	end	strand	GSF_1_GSF_backsplice_reads	GSF_2_GSF_backsplice_reads	GSF_3_GSF_backsplice_reads	OV_1_OV_backsplice_reads	OV_2_OV_backsplice_reads	OV_3_OV_backsplice_reads
ciRNA1	2136	chrNC_030835.1	12117354	12119489	+	1	0	0	0	0	0
ciRNA10	630	chrNC_030808.1	150571233	150571862	-	2	0	0	0	0	0
ciRNA100	936	chrNC_030818.1	105135651	105136586	-	0	0	1	0	0	0
ciRNA101	533	chrNC_030814.1	66643208	66643740	-	0	0	1	0	0	0
ciRNA102	157	chrNC_030814.1	71653734	71653890	+	0	0	1	0	0	0
ciRNA103	815	chrNC_030814.1	91314262	91315076	+	0	0	1	0	0	0
ciRNA104	176	chrNC_030814.1	98167440	98167615	+	0	0	2	0	0	0
ciRNA105	292	chrNC_030814.1	98172854	98173145	+	0	0	2	0	0	0
ciRNA106	528	chrNC_030830.1	12865148	12865675	+	0	0	2	0	0	0
ciRNA107	986	chrNC_030830.1	31169096	31170081	-	0	0	1	0	0	0
ciRNA108	659	chrNC_030830.1	32080299	32080957	-	0	0	6	0	0	0
ciRNA109	261	chrNC_030830.1	33221846	33222106	+	0	0	3	0	0	0
ciRNA11	646	chrNC_030812.1	30147130	30147775	-	2	0	11	2	0	1
ciRNA110	390	chrNC_030830.1	41240885	41241274	+	0	0	1	0	0	0
ciRNA111	181	chrNC_030834.1	16425374	16425554	+	0	0	2	0	0	0
ciRNA112	789	chrNC_030836.1	43963201	43963989	+	0	0	1	0	0	1
ciRNA113	744	chrNC_030836.1	44218624	44219367	+	0	0	1	0	0	0
ciRNA114	2064	chrNC_030836.1	44248637	44250700	-	0	0	1	0	0	0
ciRNA115	389	chrNC_030817.1	67824274	67824662	-	0	0	1	0	0	0
ciRNA116	246	chrNC_030823.1	53757775	53758020	-	0	0	2	0	0	0
ciRNA117	429	chrNC_030823.1	62549153	62549581	+	0	0	1	0	0	0
ciRNA118	270	chrNC_030823.1	65761426	65761695	+	0	0	2	0	0	0
ciRNA119	1447	chrNC_030827.1	10208491	10209937	-	0	0	1	0	0	0
ciRNA12	643	chrNC_030812.1	30147133	30147775	-	1	0	1	0	0	0
ciRNA120	1306	chrNC_030825.1	15101725	15103030	+	0	0	1	0	0	0
ciRNA121	371	chrNC_030825.1	15300063	15300433	-	0	0	2	0	0	0
ciRNA122	3467	chrNC_030825.1	34010235	34013701	-	0	0	1	0	0	0
ciRNA123	144	chrNC_030825.1	50395524	50395667	+	0	0	1	0	0	0
ciRNA124	422	chrNC_030825.1	50948232	50948653	+	0	0	3	0	1	4
ciRNA125	712	chrNC_030809.1	11049085	11049796	+	0	0	1	0	0	0
ciRNA126	2632	chrNC_030809.1	14250003	14252634	+	0	0	1	0	0	0
ciRNA127	304	chrNC_030809.1	129134637	129134940	+	0	0	1	0	0	0
ciRNA128	428	chrNC_030831.1	56994928	56995355	-	0	0	2	0	0	0
ciRNA129	1847	chrNC_030829.1	50114344	50116190	+	0	0	0	1	0	0
ciRNA13	1083	chrNC_030812.1	69655538	69656620	-	1	0	0	0	0	0
ciRNA130	409	chrNC_030829.1	54138494	54138902	+	0	0	0	2	0	0
ciRNA131	1559	chrNC_030835.1	15660859	15662417	-	0	0	0	1	0	0
ciRNA132	306	chrNC_030821.1	11721195	11721500	+	0	0	0	1	0	0
ciRNA133	1194	chrNC_030822.1	6580757	6581950	+	0	0	0	1	0	0
ciRNA134	1366	chrNC_030826.1	18643457	18644822	+	0	0	0	4	0	0
ciRNA135	1602	chrNC_030826.1	26885110	26886711	-	0	0	0	1	1	0
ciRNA136	545	chrNC_030826.1	38273487	38274031	+	0	0	0	2	1	2
ciRNA137	280	chrNC_030826.1	50193545	50193824	+	0	0	0	2	0	0
ciRNA138	1926	chrNC_030808.1	144646042	144647967	-	0	0	0	1	0	0
ciRNA139	244	chrNC_030812.1	56700174	56700417	-	0	0	0	1	0	0
ciRNA14	217	chrNC_030810.1	1099614	1099830	-	1	0	0	0	0	0
ciRNA140	644	chrNC_030810.1	14125789	14126432	+	0	0	0	1	0	0
ciRNA141	1124	chrNC_030810.1	14201558	14202681	+	0	0	0	1	0	0
ciRNA142	1937	chrNC_030810.1	97195379	97197315	-	0	0	0	1	0	0
ciRNA143	13422	chrNC_030810.1	105320932	105334353	-	0	0	0	4	0	0
ciRNA144	360	chrNW_017189851.1	256829	257188	-	0	0	0	3	0	2
ciRNA145	435	chrNC_030820.1	31016405	31016839	+	0	0	0	1	0	0
ciRNA146	870	chrNC_030818.1	36194631	36195500	-	0	0	0	2	0	0
ciRNA147	879	chrNC_030818.1	93733870	93734748	+	0	0	0	1	0	0
ciRNA148	460	chrNC_030814.1	71626888	71627347	+	0	0	0	2	2	5
ciRNA149	951	chrNC_030814.1	80259473	80260423	-	0	0	0	3	0	0
ciRNA15	275	chrNC_030810.1	105583430	105583704	-	1	0	0	0	0	0
ciRNA150	202	chrNC_030814.1	91911707	91911908	+	0	0	0	1	0	0
ciRNA151	1056	chrNC_030832.1	13624256	13625311	-	0	0	0	3	0	0
ciRNA152	203	chrNC_030836.1	27744638	27744840	+	0	0	0	2	0	0
ciRNA153	263	chrNC_030836.1	44546813	44547075	+	0	0	0	1	0	1
ciRNA154	965	chrNC_030817.1	27228167	27229131	+	0	0	0	1	0	0
ciRNA155	915	chrNC_030811.1	108839407	108840321	-	0	0	0	3	0	0
ciRNA156	690	chrNC_030823.1	2784351	2785040	-	0	0	0	2	0	0
ciRNA157	1214	chrNC_030823.1	37562259	37563472	+	0	0	0	5	0	0
ciRNA158	773	chrNC_030825.1	55497774	55498546	-	0	0	0	4	0	0
ciRNA159	1379	chrNC_030809.1	16842361	16843739	-	0	0	0	1	0	0
ciRNA16	1114	chrNC_030828.1	21010912	21012025	-	1	0	0	0	0	0
ciRNA160	251	chrNC_030809.1	113759973	113760223	-	0	0	0	1	0	0
ciRNA161	1095	chrNC_030815.1	39270003	39271097	-	0	0	0	3	0	0
ciRNA162	694	chrNC_030815.1	61537462	61538155	-	0	0	0	1	0	0
ciRNA163	875	chrNC_030815.1	77017354	77018228	-	0	0	0	1	0	0
ciRNA164	1185	chrNC_030815.1	77018512	77019696	-	0	0	0	1	0	0
ciRNA165	2092	chrNC_030831.1	35417315	35419406	+	0	0	0	2	0	0
ciRNA166	479	chrNC_030829.1	16987039	16987517	-	0	0	0	0	2	0
ciRNA167	322	chrNW_017209677.1	16309	16630	-	0	0	0	0	1	0
ciRNA168	213	chrNC_030822.1	53048083	53048295	-	0	0	0	0	2	0
ciRNA169	434	chrNC_030816.1	76515655	76516088	-	0	0	0	0	1	0
ciRNA17	1450	chrNC_030828.1	21306725	21308174	-	1	0	0	0	0	0
ciRNA170	872	chrNC_030826.1	13098927	13099798	-	0	0	0	0	2	0
ciRNA171	1237	chrNC_030826.1	19951224	19952460	+	0	0	0	0	1	0
ciRNA172	642	chrNC_030826.1	25887942	25888583	+	0	0	0	0	1	0
ciRNA173	209	chrNC_030826.1	27313267	27313475	+	0	0	0	0	1	0
ciRNA174	481	chrNC_030826.1	33094469	33094949	+	0	0	0	0	1	0
ciRNA175	704	chrNC_030826.1	39499976	39500679	-	0	0	0	0	1	0
ciRNA176	2672	chrNW_017189598.1	22852	25523	-	0	0	0	0	2	1
ciRNA177	678	chrNC_030808.1	5489725	5490402	+	0	0	0	0	1	0
ciRNA178	1241	chrNC_030808.1	145784559	145785799	+	0	0	0	0	1	0
ciRNA179	967	chrNW_017190143.1	88893	89859	+	0	0	0	0	2	0
ciRNA18	354	chrNC_030828.1	58121317	58121670	+	1	0	0	0	0	0
ciRNA180	698	chrNC_030812.1	56656377	56657074	-	0	0	0	0	2	0
ciRNA181	2249	chrNC_030812.1	105772789	105775037	-	0	0	0	0	2	0
ciRNA182	521	chrNC_030812.1	109674075	109674595	-	0	0	0	0	1	0
ciRNA183	1756	chrNC_030812.1	111753540	111755295	+	0	0	0	0	1	0
ciRNA184	109	chrNC_030812.1	118522314	118522422	+	0	0	0	0	2	0
ciRNA185	417	chrNC_030810.1	26877177	26877593	+	0	0	0	0	2	0
ciRNA186	894	chrNC_030810.1	43741876	43742769	-	0	0	0	0	1	0
ciRNA187	3148	chrNC_030810.1	44105179	44108326	-	0	0	0	0	1	0
ciRNA188	3333	chrNC_030810.1	45952777	45956109	+	0	0	0	0	4	0
ciRNA189	322	chrNC_030810.1	93643837	93644158	+	0	0	0	0	1	0
ciRNA19	238	chrNC_030820.1	42513413	42513650	-	2	0	0	0	0	0
ciRNA190	1534	chrNC_030810.1	97212982	97214515	-	0	0	0	0	2	0
ciRNA191	1194	chrNC_030828.1	21045884	21047077	-	0	0	0	0	3	0
ciRNA192	2113	chrNC_030828.1	26420626	26422738	+	0	0	0	0	2	0
ciRNA193	1812	chrNC_030828.1	33502919	33504730	-	0	0	0	0	1	0
ciRNA194	897	chrNC_030828.1	66153149	66154045	+	0	0	0	0	1	0
ciRNA195	891	chrNC_030820.1	16671985	16672875	+	0	0	0	0	1	0
ciRNA196	332	chrNC_030820.1	53773867	53774198	-	0	0	0	0	1	3
ciRNA197	183	chrNC_030818.1	10095039	10095221	+	0	0	0	0	1	0
ciRNA198	180	chrNC_030818.1	98694147	98694326	-	0	0	0	0	3	0
ciRNA199	1166	chrNC_030818.1	105101603	105102768	-	0	0	0	0	1	0
ciRNA2	324	chrNW_017209677.1	16307	16630	-	2	0	0	0	0	0
ciRNA20	462	chrNC_030814.1	71626888	71627349	+	1	0	0	0	0	0
ciRNA200	409	chrNC_030814.1	58670762	58671170	-	0	0	0	0	1	0
ciRNA201	1414	chrNC_030814.1	64411044	64412457	-	0	0	0	0	1	0
ciRNA202	468	chrNC_030814.1	71626888	71627355	+	0	0	0	0	1	0
ciRNA203	983	chrNC_030814.1	102277483	102278465	-	0	0	0	0	1	0
ciRNA204	684	chrNC_030832.1	3801058	3801741	-	0	0	0	0	3	0
ciRNA205	214	chrNC_030832.1	26135908	26136121	-	0	0	0	0	1	0
ciRNA206	1386	chrNC_030836.1	41212423	41213808	-	0	0	0	0	1	0
ciRNA207	219	chrNC_030836.1	41214588	41214806	-	0	0	0	0	2	0
ciRNA208	200	chrNC_030836.1	41247811	41248010	-	0	0	0	0	1	0
ciRNA209	1244	chrNC_030817.1	22455440	22456683	+	0	0	0	0	1	0
ciRNA21	5732	chrNC_030830.1	18050562	18056293	+	1	0	0	0	0	0
ciRNA210	565	chrNC_030817.1	23483891	23484455	+	0	0	0	0	1	0
ciRNA211	591	chrNC_030813.1	20253256	20253846	-	0	0	0	0	2	0
ciRNA212	488	chrNC_030813.1	89327414	89327901	-	0	0	0	0	2	0
ciRNA213	653	chrNC_030823.1	60661653	60662305	+	0	0	0	0	1	0
ciRNA214	1848	chrNC_030833.1	36704784	36706631	+	0	0	0	0	3	2
ciRNA215	643	chrNC_030827.1	35428236	35428878	+	0	0	0	0	1	0
ciRNA216	384	chrNC_030825.1	27062843	27063226	+	0	0	0	0	1	0
ciRNA217	543	chrNC_030825.1	49357897	49358439	+	0	0	0	0	2	1
ciRNA218	548	chrNC_030825.1	49970334	49970881	+	0	0	0	0	1	0
ciRNA219	189	chrNC_030825.1	51347963	51348151	+	0	0	0	0	1	0
ciRNA22	769	chrNC_030830.1	32081164	32081932	-	1	0	0	0	0	0
ciRNA220	296	chrNC_030809.1	13903644	13903939	-	0	0	0	0	5	2
ciRNA221	2633	chrNC_030809.1	14250003	14252635	+	0	0	0	0	2	0
ciRNA222	1141	chrNC_030809.1	14257856	14258996	+	0	0	0	0	1	0
ciRNA223	174	chrNC_030809.1	29176367	29176540	+	0	0	0	0	4	0
ciRNA224	175	chrNC_030809.1	29176367	29176541	+	0	0	0	0	1	2
ciRNA225	1511	chrNC_030809.1	56444651	56446161	+	0	0	0	0	3	0
ciRNA226	870	chrNC_030809.1	111511610	111512479	+	0	0	0	0	2	0
ciRNA227	1180	chrNC_030815.1	77018517	77019696	-	0	0	0	0	1	2
ciRNA228	214	chrNC_030815.1	103191825	103192038	+	0	0	0	0	1	0
ciRNA229	3681	chrNC_030829.1	16707454	16711134	+	0	0	0	0	0	1
ciRNA23	422	chrNC_030832.1	13131922	13132343	+	2	0	0	0	0	0
ciRNA230	983	chrNC_030829.1	54129955	54130937	+	0	0	0	0	0	1
ciRNA231	2593	chrNC_030829.1	54138494	54141086	+	0	0	0	0	0	1
ciRNA232	422	chrNC_030835.1	2121585	2122006	+	0	0	0	0	0	1
ciRNA233	1990	chrNC_030821.1	645113	647102	-	0	0	0	0	0	1
ciRNA234	321	chrNC_030821.1	45491632	45491952	+	0	0	0	0	0	2
ciRNA235	580	chrNW_017190151.1	25239	25818	+	0	0	0	0	0	1
ciRNA236	554	chrNW_017189590.1	49195	49748	+	0	0	0	0	0	1
ciRNA237	713	chrNW_017190149.1	77109	77821	+	0	0	0	0	0	1
ciRNA238	296	chrNC_030822.1	54468771	54469066	-	0	0	0	0	0	2
ciRNA239	1622	chrNC_030826.1	25084568	25086189	+	0	0	0	0	0	1
ciRNA24	428	chrNC_030832.1	41334718	41335145	+	1	0	0	0	0	0
ciRNA240	265	chrNC_030826.1	38990076	38990340	-	0	0	0	0	0	1
ciRNA241	251	chrNC_030826.1	42376386	42376636	-	0	0	0	0	0	2
ciRNA242	262	chrNC_030826.1	43565134	43565395	-	0	0	0	0	0	1
ciRNA243	946	chrNC_030826.1	43615568	43616513	+	0	0	0	0	0	2
ciRNA244	595	chrNC_030826.1	51714507	51715101	-	0	0	0	0	0	1
ciRNA245	1295	chrNC_030826.1	53255259	53256553	-	0	0	0	0	0	1
ciRNA246	646	chrNC_030824.1	1243478	1244123	-	0	0	0	0	0	1
ciRNA247	154	chrNC_030824.1	16936540	16936693	+	0	0	0	0	0	1
ciRNA248	2647	chrNC_030808.1	81207780	81210426	+	0	0	0	0	0	1
ciRNA249	259	chrNC_030808.1	110008638	110008896	+	0	0	0	0	0	1
ciRNA25	1392	chrNC_030836.1	41212417	41213808	-	1	0	0	0	0	0
ciRNA250	487	chrNC_030808.1	114983795	114984281	-	0	0	0	0	0	1
ciRNA251	1856	chrNC_030808.1	144295351	144297206	+	0	0	0	0	0	2
ciRNA252	536	chrNC_030808.1	148505467	148506002	+	0	0	0	0	0	2
ciRNA253	993	chrNC_030808.1	149209845	149210837	+	0	0	0	0	0	1
ciRNA254	598	chrNC_030812.1	25469222	25469819	-	0	0	0	0	0	1
ciRNA255	645	chrNC_030812.1	30147131	30147775	-	0	0	0	0	0	1
ciRNA256	5828	chrNC_030812.1	30746553	30752380	+	0	0	0	0	0	1
ciRNA257	979	chrNC_030812.1	55593830	55594808	-	0	0	0	0	0	1
ciRNA258	467	chrNC_030812.1	56196506	56196972	+	0	0	0	0	0	2
ciRNA259	1345	chrNC_030812.1	72315456	72316800	+	0	0	0	0	0	3
ciRNA26	726	chrNC_030817.1	23911653	23912378	+	2	0	0	0	0	0
ciRNA260	301	chrNC_030812.1	118893141	118893441	-	0	0	0	0	0	3
ciRNA261	1762	chrNC_030810.1	10553343	10555104	-	0	0	0	0	0	1
ciRNA262	313	chrNC_030810.1	33421433	33421745	-	0	0	0	0	0	1
ciRNA263	2100	chrNC_030810.1	39532455	39534554	+	0	0	0	0	0	2
ciRNA264	318	chrNC_030810.1	62714647	62714964	+	0	0	0	0	0	1
ciRNA265	562	chrNC_030810.1	100658212	100658773	-	0	0	0	0	0	1
ciRNA266	375	chrNC_030810.1	110584040	110584414	+	0	0	0	0	0	1
ciRNA267	492	chrNC_030828.1	30460563	30461054	+	0	0	0	0	0	1
ciRNA268	422	chrNC_030828.1	34109051	34109472	-	0	0	0	0	0	1
ciRNA269	417	chrNC_030828.1	34109056	34109472	-	0	0	0	0	0	1
ciRNA27	537	chrNC_030813.1	61485612	61486148	+	1	0	0	0	0	0
ciRNA270	690	chrNW_017189530.1	515670	516359	-	0	0	0	0	0	2
ciRNA271	405	chrNW_017189530.1	515955	516359	-	0	0	0	0	0	2
ciRNA272	250	chrNC_030820.1	37434204	37434453	-	0	0	0	0	0	1
ciRNA273	467	chrNC_030820.1	75706326	75706792	-	0	0	0	0	0	1
ciRNA274	591	chrNC_030818.1	2313509	2314099	-	0	0	0	0	0	1
ciRNA275	573	chrNC_030818.1	78371039	78371611	+	0	0	0	0	0	2
ciRNA276	714	chrNC_030818.1	80561854	80562567	-	0	0	0	0	0	1
ciRNA277	253	chrNC_030818.1	99714210	99714462	+	0	0	0	0	0	2
ciRNA278	532	chrNC_030818.1	104545318	104545849	-	0	0	0	0	0	2
ciRNA279	516	chrNC_030814.1	44315214	44315729	+	0	0	0	0	0	1
ciRNA28	1627	chrNC_030813.1	105581861	105583487	-	2	0	0	0	0	0
ciRNA280	4552	chrNC_030814.1	49767405	49771956	-	0	0	0	0	0	1
ciRNA281	2627	chrNC_030814.1	59823827	59826453	+	0	0	0	0	0	2
ciRNA282	156	chrNC_030814.1	60881892	60882047	-	0	0	0	0	0	1
ciRNA283	432	chrNC_030814.1	89193918	89194349	-	0	0	0	0	0	1
ciRNA284	831	chrNC_030814.1	92754589	92755419	+	0	0	0	0	0	2
ciRNA285	384	chrNC_030814.1	102906436	102906819	+	0	0	0	0	0	1
ciRNA286	907	chrNC_030830.1	39329100	39330006	-	0	0	0	0	0	1
ciRNA287	212	chrNC_030832.1	2320770	2320981	-	0	0	0	0	0	13
ciRNA288	1457	chrNC_030832.1	4007599	4009055	+	0	0	0	0	0	1
ciRNA289	4502	chrNC_030832.1	14293762	14298263	+	0	0	0	0	0	2
ciRNA29	1138	chrNC_030823.1	22158623	22159760	+	1	0	0	0	0	0
ciRNA290	1288	chrNC_030832.1	21045035	21046322	-	0	0	0	0	0	1
ciRNA291	275	chrNC_030832.1	25578031	25578305	-	0	0	0	0	0	1
ciRNA292	378	chrNC_030832.1	26173876	26174253	-	0	0	0	0	0	1
ciRNA293	304	chrNC_030832.1	35474829	35475132	+	0	0	0	0	0	1
ciRNA294	285	chrNC_030832.1	36474967	36475251	-	0	0	0	0	0	2
ciRNA295	1792	chrNC_030834.1	31400130	31401921	-	0	0	0	0	0	1
ciRNA296	1287	chrNC_030836.1	41291945	41293231	-	0	0	0	0	0	2
ciRNA297	184	chrNC_030836.1	44382464	44382647	-	0	0	0	0	0	1
ciRNA298	630	chrNC_030836.1	46240629	46241258	+	0	0	0	0	0	1
ciRNA299	631	chrNC_030836.1	46240629	46241259	+	0	0	0	0	0	2
ciRNA3	1397	chrNC_030826.1	19653784	19655180	+	1	0	0	0	0	0
ciRNA30	1441	chrNC_030827.1	31257691	31259131	+	1	0	0	0	0	0
ciRNA300	1022	chrNC_030817.1	17279147	17280168	+	0	0	0	0	0	1
ciRNA301	419	chrNC_030817.1	20462603	20463021	-	0	0	0	0	0	1
ciRNA302	1233	chrNC_030817.1	56119895	56121127	+	0	0	0	0	0	1
ciRNA303	904	chrNC_030817.1	57772264	57773167	-	0	0	0	0	0	4
ciRNA304	2224	chrNC_030817.1	79632455	79634678	-	0	0	0	0	0	1
ciRNA305	207	chrNC_030813.1	115687022	115687228	+	0	0	0	0	0	1
ciRNA306	1200	chrNC_030823.1	37562259	37563458	+	0	0	0	0	0	2
ciRNA307	1920	chrNC_030823.1	44145019	44146938	-	0	0	0	0	0	1
ciRNA308	5303	chrNC_030819.1	1052661	1057963	+	0	0	0	0	0	1
ciRNA309	1160	chrNC_030819.1	1412294	1413453	+	0	0	0	0	0	2
ciRNA31	1171	chrNC_030825.1	3183015	3184185	-	2	0	0	0	0	0
ciRNA310	1170	chrNC_030825.1	3183016	3184185	-	0	0	0	0	0	1
ciRNA311	768	chrNC_030825.1	53796368	53797135	+	0	0	0	0	0	3
ciRNA312	1502	chrNC_030825.1	56620165	56621666	+	0	0	0	0	0	2
ciRNA313	765	chrNC_030825.1	57074194	57074958	-	0	0	0	0	0	1
ciRNA314	231	chrNC_030825.1	64786486	64786716	-	0	0	0	0	0	1
ciRNA315	162	chrNC_030825.1	65929842	65930003	+	0	0	0	0	0	2
ciRNA316	350	chrNC_030809.1	527878	528227	+	0	0	0	0	0	3
ciRNA317	4996	chrNC_030809.1	32423532	32428527	+	0	0	0	0	0	1
ciRNA318	1092	chrNC_030815.1	68995326	68996417	+	0	0	0	0	0	1
ciRNA319	1186	chrNC_030831.1	35934413	35935598	-	0	0	0	0	0	1
ciRNA32	309	chrNC_030825.1	50043429	50043737	+	1	0	0	0	0	0
ciRNA320	210	chrNC_030831.1	42004629	42004838	+	0	0	0	0	0	3
ciRNA321	395	chrNC_030831.1	43096269	43096663	-	0	0	0	0	0	2
ciRNA33	420	chrNC_030825.1	50948232	50948651	+	1	0	0	0	0	0
ciRNA34	351	chrNC_030809.1	527878	528228	+	1	0	0	0	0	0
ciRNA35	1633	chrNC_030809.1	73905076	73906708	+	2	1	0	0	0	0
ciRNA36	532	chrNC_030821.1	63950415	63950946	-	0	2	0	0	0	0
ciRNA37	378	chrNC_030822.1	54311729	54312106	-	0	1	0	0	0	0
ciRNA38	1599	chrNC_030826.1	26885113	26886711	-	0	1	4	0	0	0
ciRNA39	651	chrNC_030824.1	9004920	9005570	-	0	1	0	0	0	0
ciRNA4	359	chrNC_030826.1	19864963	19865321	-	1	0	0	0	0	0
ciRNA40	1597	chrNC_030808.1	135414005	135415601	-	0	1	0	0	0	0
ciRNA41	2000	chrNC_030812.1	17667632	17669631	-	0	1	0	0	0	0
ciRNA42	649	chrNC_030812.1	30147127	30147775	-	0	1	0	2	0	0
ciRNA43	376	chrNC_030810.1	18132253	18132628	-	0	1	0	0	0	0
ciRNA44	160	chrNC_030810.1	21197617	21197776	-	0	1	0	0	0	0
ciRNA45	1877	chrNC_030810.1	110549471	110551347	-	0	3	0	0	0	0
ciRNA46	525	chrNW_017189851.1	349038	349562	-	0	1	0	0	0	0
ciRNA47	671	chrNC_030828.1	34028110	34028780	-	0	3	0	0	0	0
ciRNA48	526	chrNC_030828.1	54897152	54897677	+	0	3	0	0	0	0
ciRNA49	409	chrNC_030820.1	37436430	37436838	-	0	2	0	0	0	0
ciRNA5	1598	chrNC_030826.1	26885114	26886711	-	1	0	0	0	0	0
ciRNA50	927	chrNC_030820.1	77503399	77504325	+	0	1	0	0	0	0
ciRNA51	816	chrNC_030818.1	29032417	29033232	+	0	1	0	0	0	0
ciRNA52	3745	chrNC_030818.1	36941664	36945408	+	0	1	0	0	0	0
ciRNA53	355	chrNW_017189516.1	10470396	10470750	-	0	3	0	0	0	0
ciRNA54	448	chrNC_030814.1	71626888	71627335	+	0	1	0	0	0	0
ciRNA55	206	chrNC_030814.1	94573218	94573423	+	0	1	0	0	0	0
ciRNA56	179	chrNC_030830.1	22071345	22071523	-	0	1	0	0	0	0
ciRNA57	773	chrNC_030830.1	32081160	32081932	-	0	1	1	0	0	1
ciRNA58	4615	chrNC_030817.1	41297786	41302400	-	0	2	0	0	0	0
ciRNA59	649	chrNC_030823.1	60661653	60662301	+	0	1	0	0	0	0
ciRNA6	240	chrNC_030826.1	27049833	27050072	+	1	0	0	0	0	0
ciRNA60	1166	chrNC_030833.1	31047055	31048220	+	0	4	0	0	0	0
ciRNA61	3323	chrNC_030833.1	36729806	36733128	+	0	2	0	0	0	0
ciRNA62	602	chrNC_030819.1	11234831	11235432	-	0	1	0	0	0	0
ciRNA63	300	chrNC_030819.1	50973155	50973454	-	0	1	0	0	0	0
ciRNA64	338	chrNC_030825.1	3045856	3046193	+	0	1	1	0	0	0
ciRNA65	188	chrNC_030825.1	51347963	51348150	+	0	3	0	0	0	0
ciRNA66	948	chrNC_030825.1	51375116	51376063	+	0	2	0	0	0	0
ciRNA67	963	chrNC_030825.1	56068309	56069271	+	0	2	0	0	0	0
ciRNA68	908	chrNC_030809.1	56512657	56513564	-	0	1	0	0	0	0
ciRNA69	1875	chrNC_030815.1	46298160	46300034	+	0	2	0	0	0	0
ciRNA7	182	chrNC_030824.1	1383982	1384163	+	1	0	0	0	0	0
ciRNA70	1846	chrNC_030815.1	46298160	46300005	+	0	2	0	0	1	0
ciRNA71	1058	chrNC_030815.1	59122573	59123630	-	0	2	0	0	0	0
ciRNA72	471	chrNC_030815.1	59686842	59687312	-	0	2	0	0	0	0
ciRNA73	2729	chrNC_030815.1	83701683	83704411	-	0	1	0	0	0	0
ciRNA74	2600	chrNC_030829.1	10348208	10350807	-	0	0	1	0	0	0
ciRNA75	226	chrNC_030829.1	50872447	50872672	+	0	0	1	0	0	0
ciRNA76	262	chrNC_030829.1	51311896	51312157	+	0	0	2	0	0	0
ciRNA77	324	chrNC_030829.1	54340060	54340383	-	0	0	1	0	0	0
ciRNA78	316	chrNC_030835.1	845179	845494	-	0	0	1	0	0	0
ciRNA79	285	chrNC_030822.1	48652403	48652687	+	0	0	2	0	0	0
ciRNA8	932	chrNC_030824.1	1917923	1918854	+	1	0	0	0	0	0
ciRNA80	414	chrNC_030826.1	19949586	19949999	+	0	0	1	0	0	0
ciRNA81	1711	chrNC_030826.1	20282752	20284462	-	0	0	1	0	0	0
ciRNA82	1623	chrNC_030826.1	24532725	24534347	-	0	0	2	0	0	0
ciRNA83	905	chrNC_030826.1	26226870	26227774	+	0	0	1	0	0	0
ciRNA84	328	chrNC_030826.1	42326123	42326450	+	0	0	1	0	0	0
ciRNA85	274	chrNC_030826.1	42376372	42376645	-	0	0	1	0	0	0
ciRNA86	7970	chrNC_030826.1	54300142	54308111	+	0	0	1	0	0	0
ciRNA87	2289	chrNC_030824.1	9959694	9961982	+	0	0	1	0	0	0
ciRNA88	5892	chrNC_030824.1	26779230	26785121	-	0	0	2	0	0	0
ciRNA89	1062	chrNC_030812.1	29737112	29738173	+	0	0	1	0	0	0
ciRNA9	430	chrNC_030808.1	145898842	145899271	-	1	0	0	0	0	0
ciRNA90	197	chrNC_030812.1	32059852	32060048	+	0	0	1	0	0	0
ciRNA91	3292	chrNC_030812.1	64637056	64640347	+	0	0	2	0	0	0
ciRNA92	615	chrNC_030812.1	68483574	68484188	+	0	0	2	0	0	0
ciRNA93	6575	chrNC_030812.1	102813818	102820392	-	0	0	2	0	0	0
ciRNA94	4039	chrNC_030812.1	108349716	108353754	+	0	0	1	0	0	0
ciRNA95	381	chrNC_030810.1	19528582	19528962	+	0	0	1	0	0	0
ciRNA96	345	chrNC_030810.1	20680809	20681153	+	0	0	3	0	0	0
ciRNA97	773	chrNC_030810.1	45958501	45959273	+	0	0	1	0	0	0
ciRNA98	6060	chrNC_030818.1	10560188	10566247	-	0	0	2	0	0	0
ciRNA99	748	chrNC_030818.1	100584116	100584863	+	0	0	2	0	0	0
circRNA1	465	chrNW_017189525.1	56015	58745	+	4	1	0	6	1	0
circRNA10	1116	chrNC_030829.1	6011832	6043492	+	1	0	0	0	0	0
circRNA100	603	chrNC_030829.1	54129733	54131350	+	1	0	0	3	0	0
circRNA1000	282	chrNC_030808.1	56439857	56441171	+	9	5	4	6	10	8
circRNA10000	537	chrNW_017189962.1	274566	286185	+	0	0	0	2	0	0
circRNA10001	1069	chrNW_017189962.1	274566	288356	+	0	0	0	1	0	0
circRNA10002	2279	chrNC_030822.1	651788	676129	+	0	0	0	3	0	0
circRNA10003	281	chrNC_030822.1	5136451	5139021	-	0	0	0	1	0	0
circRNA10004	347	chrNC_030822.1	6287607	6289103	+	0	0	0	1	1	2
circRNA10005	490	chrNC_030822.1	6670338	6677172	-	0	0	0	1	0	0
circRNA10006	566	chrNC_030822.1	8786721	8787286	-	0	0	0	2	0	0
circRNA10007	732	chrNC_030822.1	9485952	9489640	-	0	0	0	1	0	1
circRNA10008	369	chrNC_030822.1	16063013	16065443	-	0	0	0	2	0	0
circRNA10009	254	chrNC_030822.1	17524979	17526913	+	0	0	0	1	0	0
circRNA1001	593	chrNC_030808.1	56468359	56480276	+	3	0	0	5	0	4
circRNA10010	800	chrNC_030822.1	18965698	18976762	-	0	0	0	4	0	1
circRNA10011	1034	chrNC_030822.1	19306263	19317457	-	0	0	0	8	0	0
circRNA10012	490	chrNC_030822.1	20488867	20512255	-	0	0	0	2	0	0
circRNA10013	831	chrNC_030822.1	27015473	27029263	-	0	0	0	2	1	0
circRNA10014	221	chrNC_030822.1	28913320	28939374	-	0	0	0	3	0	0
circRNA10015	1211	chrNC_030822.1	29320267	29330568	+	0	0	0	2	0	0
circRNA10016	466	chrNC_030822.1	29493319	29494799	+	0	0	0	4	0	0
circRNA10017	2857	chrNC_030822.1	29510612	29534938	+	0	0	0	1	0	0
circRNA10018	3924	chrNC_030822.1	29516855	29565692	+	0	0	0	1	0	0
circRNA10019	1568	chrNC_030822.1	32011098	32044715	-	0	0	0	3	0	0
circRNA1002	687	chrNC_030808.1	56471428	56491329	+	3	0	0	0	0	0
circRNA10020	943	chrNC_030822.1	39180825	39185444	+	0	0	0	1	3	1
circRNA10021	465	chrNC_030822.1	39520939	39524286	-	0	0	0	3	0	2
circRNA10022	348	chrNC_030822.1	39711551	39737834	-	0	0	0	1	0	0
circRNA10023	1584	chrNC_030822.1	41561705	41580422	+	0	0	0	1	0	0
circRNA10024	375	chrNC_030822.1	41823734	41829285	+	0	0	0	2	0	0
circRNA10025	521	chrNC_030822.1	42080261	42105392	+	0	0	0	1	0	0
circRNA10026	1171	chrNC_030822.1	43048169	43096176	-	0	0	0	3	0	0
circRNA10027	582	chrNC_030822.1	43345777	43350099	+	0	0	0	1	0	0
circRNA10028	419	chrNC_030822.1	43901525	43911513	-	0	0	0	1	4	2
circRNA10029	1105	chrNC_030822.1	44451374	44467462	-	0	0	0	1	0	0
circRNA1003	502	chrNC_030808.1	57925203	57931177	-	2	0	0	0	0	0
circRNA10030	1033	chrNC_030822.1	46946261	46956012	-	0	0	0	2	0	0
circRNA10031	504	chrNC_030822.1	47165123	47172646	+	0	0	0	1	0	0
circRNA10032	244	chrNC_030822.1	50675907	50677595	-	0	0	0	1	0	0
circRNA10033	866	chrNC_030822.1	52687590	52689197	-	0	0	0	1	0	0
circRNA10034	531	chrNC_030822.1	54297937	54301523	-	0	0	0	2	0	3
circRNA10035	181	chrNC_030822.1	54712446	54716212	+	0	0	0	2	3	0
circRNA10036	570	chrNC_030822.1	60155374	60174934	+	0	0	0	1	0	1
circRNA10037	1406	chrNC_030822.1	62018104	62072768	+	0	0	0	1	0	0
circRNA10038	1804	chrNC_030822.1	62018104	62080067	+	0	0	0	2	0	1
circRNA10039	479	chrNC_030822.1	64255502	64271589	+	0	0	0	1	0	0
circRNA1004	1605	chrNC_030808.1	58755270	58756874	-	3	0	2	9	1	2
circRNA10040	2014	chrNC_030822.1	64622570	64689391	-	0	0	0	1	0	0
circRNA10041	846	chrNC_030822.1	64624140	64637109	-	0	0	0	1	0	0
circRNA10042	829	chrNC_030822.1	64958427	64969415	+	0	0	0	1	0	0
circRNA10043	339	chrNC_030822.1	67934864	67935949	-	0	0	0	2	0	1
circRNA10044	316	chrNC_030822.1	68079357	68091019	-	0	0	0	1	0	0
circRNA10045	399	chrNC_030822.1	77079933	77081430	+	0	0	0	2	0	0
circRNA10046	948	chrNC_030822.1	77081279	77096749	+	0	0	0	1	0	0
circRNA10047	399	chrNC_030822.1	77127033	77128975	+	0	0	0	1	0	1
circRNA10048	1344	chrNC_030822.1	77187310	77276549	+	0	0	0	4	0	0
circRNA10049	546	chrNC_030822.1	77213088	77227496	+	0	0	0	1	1	0
circRNA1005	582	chrNC_030808.1	63860185	63873277	+	7	2	6	5	0	8
circRNA10050	698	chrNC_030822.1	81074578	81100967	+	0	0	0	4	0	0
circRNA10051	1059	chrNC_030816.1	262939	313150	-	0	0	0	1	0	3
circRNA10052	1600	chrNC_030816.1	376325	452629	+	0	0	0	2	0	0
circRNA10053	1323	chrNC_030816.1	470033	492880	+	0	0	0	1	0	0
circRNA10054	365	chrNC_030816.1	494041	498721	+	0	0	0	3	0	0
circRNA10055	813	chrNC_030816.1	1900953	1908872	-	0	0	0	1	0	4
circRNA10056	977	chrNC_030816.1	2551202	2563416	+	0	0	0	4	0	0
circRNA10057	357	chrNC_030816.1	7029116	7033698	+	0	0	0	2	0	0
circRNA10058	1135	chrNC_030816.1	7029116	7045984	+	0	0	0	2	0	0
circRNA10059	413	chrNC_030816.1	10189553	10204102	-	0	0	0	4	0	0
circRNA1006	963	chrNC_030808.1	63877814	63895667	+	1	0	0	0	0	1
circRNA10060	743	chrNC_030816.1	12527592	12542380	-	0	0	0	3	0	0
circRNA10061	427	chrNC_030816.1	12615912	12625376	-	0	0	0	2	0	0
circRNA10062	595	chrNC_030816.1	13210309	13224181	+	0	0	0	1	0	1
circRNA10063	925	chrNC_030816.1	17040238	17059668	+	0	0	0	4	0	3
circRNA10064	585	chrNC_030816.1	17052311	17059668	+	0	0	0	7	1	0
circRNA10065	1007	chrNC_030816.1	17102210	17164761	+	0	0	0	1	0	0
circRNA10066	473	chrNC_030816.1	20492217	20513508	-	0	0	0	1	0	0
circRNA10067	699	chrNC_030816.1	25598039	25611621	+	0	0	0	1	1	0
circRNA10068	1229	chrNC_030816.1	25617711	25627244	+	0	0	0	3	1	4
circRNA10069	193	chrNC_030816.1	26174862	26175054	+	0	0	0	1	0	0
circRNA1007	2095	chrNC_030808.1	64170832	64243415	+	2	0	0	0	0	0
circRNA10070	1436	chrNC_030816.1	28811279	28812714	-	0	0	0	6	2	4
circRNA10071	477	chrNC_030816.1	29826676	29858156	-	0	0	0	1	0	0
circRNA10072	356	chrNC_030816.1	30597706	30599787	-	0	0	0	1	0	0
circRNA10073	1030	chrNC_030816.1	30676982	30701050	-	0	0	0	3	0	0
circRNA10074	267	chrNC_030816.1	30689746	30698358	-	0	0	0	2	0	0
circRNA10075	465	chrNC_030816.1	30943074	30991380	+	0	0	0	1	0	0
circRNA10076	521	chrNC_030816.1	32444789	32469383	+	0	0	0	2	0	4
circRNA10077	418	chrNC_030816.1	40500040	40504414	-	0	0	0	1	1	0
circRNA10078	347	chrNC_030816.1	48306282	48306628	+	0	0	0	3	0	0
circRNA10079	620	chrNC_030816.1	48407500	48434174	+	0	0	0	1	0	0
circRNA1008	447	chrNC_030808.1	64403979	64413475	-	2	2	2	0	1	5
circRNA10080	832	chrNC_030816.1	48407500	48444680	+	0	0	0	1	0	0
circRNA10081	198	chrNC_030816.1	49603824	49604453	-	0	0	0	1	0	0
circRNA10082	494	chrNC_030816.1	51129110	51140802	+	0	0	0	2	7	0
circRNA10083	1345	chrNC_030816.1	51140718	51164249	+	0	0	0	1	0	0
circRNA10084	702	chrNC_030816.1	51152946	51161525	+	0	0	0	1	0	1
circRNA10085	512	chrNC_030816.1	52439923	52454168	+	0	0	0	1	0	0
circRNA10086	1267	chrNC_030816.1	52477481	52489848	+	0	0	0	4	0	0
circRNA10087	544	chrNC_030816.1	52676094	52699110	-	0	0	0	2	0	0
circRNA10088	272	chrNC_030816.1	53703354	53703625	-	0	0	0	1	2	0
circRNA10089	669	chrNC_030816.1	55049042	55061427	-	0	0	0	4	0	1
circRNA1009	333	chrNC_030808.1	64650284	64653148	-	2	0	0	0	0	0
circRNA10090	1808	chrNC_030816.1	56258764	56322020	-	0	0	0	1	0	1
circRNA10091	1829	chrNC_030816.1	57084777	57114247	+	0	0	0	2	0	0
circRNA10092	367	chrNC_030816.1	60114178	60118992	-	0	0	0	1	0	0
circRNA10093	309	chrNC_030816.1	60484892	60530639	-	0	0	0	3	0	1
circRNA10094	174	chrNC_030816.1	60494731	60530639	-	0	0	0	1	0	0
circRNA10095	1251	chrNC_030816.1	63780049	63805919	-	0	0	0	2	0	0
circRNA10096	805	chrNC_030816.1	68858320	68875340	+	0	0	0	1	0	0
circRNA10097	2691	chrNC_030816.1	68858320	68909603	+	0	0	0	6	0	0
circRNA10098	423	chrNC_030816.1	68874264	68875340	+	0	0	0	1	0	0
circRNA10099	324	chrNC_030816.1	68973755	68976188	+	0	0	0	2	0	0
circRNA101	455	chrNC_030829.1	54229013	54240934	+	2	0	0	6	1	0
circRNA1010	478	chrNC_030808.1	65121870	65122347	+	6	6	6	4	3	6
circRNA10100	703	chrNC_030816.1	69105816	69149923	+	0	0	0	1	0	0
circRNA10101	424	chrNC_030816.1	69149777	69182543	+	0	0	0	3	0	0
circRNA10102	1716	chrNC_030816.1	70265609	70280682	-	0	0	0	1	0	0
circRNA10103	304	chrNC_030816.1	73715899	73719139	-	0	0	0	1	0	0
circRNA10104	553	chrNC_030816.1	75288233	75297163	+	0	0	0	3	1	0
circRNA10105	685	chrNC_030816.1	75336553	75355225	+	0	0	0	1	0	0
circRNA10106	5634	chrNC_030816.1	76482518	76573072	-	0	0	0	2	0	0
circRNA10107	461	chrNC_030816.1	76504531	76510808	-	0	0	0	2	0	0
circRNA10108	3788	chrNC_030816.1	78746109	78792210	+	0	0	0	1	0	0
circRNA10109	2385	chrNC_030816.1	79049169	79085124	+	0	0	0	1	0	0
circRNA1011	680	chrNC_030808.1	65121870	65139293	+	2	0	0	0	0	0
circRNA10110	1167	chrNC_030816.1	79055891	79075737	+	0	0	0	2	0	0
circRNA10111	413	chrNC_030816.1	79205602	79222570	-	0	0	0	1	0	0
circRNA10112	345	chrNC_030816.1	80772193	80847417	+	0	0	0	1	0	0
circRNA10113	456	chrNC_030816.1	80772193	80879155	+	0	0	0	5	3	1
circRNA10114	2979	chrNC_030816.1	82114862	82231394	+	0	0	0	1	0	0
circRNA10115	720	chrNC_030816.1	83346638	83352263	-	0	0	0	1	0	0
circRNA10116	164	chrNC_030816.1	85256119	85256282	-	0	0	0	3	0	0
circRNA10117	360	chrNC_030816.1	88879849	88889076	-	0	0	0	2	0	0
circRNA10118	577	chrNC_030816.1	90126793	90187231	+	0	0	0	4	0	0
circRNA10119	870	chrNC_030816.1	90967636	90975164	-	0	0	0	1	1	1
circRNA1012	922	chrNC_030808.1	65121870	65145369	+	1	0	0	0	0	0
circRNA10120	487	chrNC_030816.1	91408052	91424592	+	0	0	0	4	0	0
circRNA10121	468	chrNC_030826.1	7266542	7271974	+	0	0	0	2	0	0
circRNA10122	1673	chrNC_030826.1	9600441	9647949	-	0	0	0	1	0	0
circRNA10123	713	chrNC_030826.1	9603666	9629648	-	0	0	0	3	0	0
circRNA10124	390	chrNC_030826.1	9647770	9686116	-	0	0	0	2	0	0
circRNA10125	276	chrNC_030826.1	10250551	10252895	+	0	0	0	2	0	0
circRNA10126	288	chrNC_030826.1	10252782	10253623	+	0	0	0	2	0	0
circRNA10127	1099	chrNC_030826.1	10755086	10758188	+	0	0	0	3	0	0
circRNA10128	846	chrNC_030826.1	10901081	10912990	+	0	0	0	8	4	0
circRNA10129	664	chrNC_030826.1	11705630	11758528	-	0	0	0	2	0	0
circRNA1013	941	chrNC_030808.1	65647220	65658104	-	2	0	0	1	1	0
circRNA10130	834	chrNC_030826.1	12114898	12139999	+	0	0	0	4	1	0
circRNA10131	1111	chrNC_030826.1	12114898	12144939	+	0	0	0	4	0	0
circRNA10132	2940	chrNC_030826.1	12379762	12414846	+	0	0	0	1	0	0
circRNA10133	807	chrNC_030826.1	12412708	12415382	+	0	0	0	2	0	0
circRNA10134	661	chrNC_030826.1	13216961	13221287	-	0	0	0	1	0	0
circRNA10135	1541	chrNC_030826.1	13485804	13497631	-	0	0	0	4	2	3
circRNA10136	810	chrNC_030826.1	13536208	13543332	-	0	0	0	4	2	1
circRNA10137	1456	chrNC_030826.1	13536208	13550219	-	0	0	0	1	0	0
circRNA10138	1655	chrNC_030826.1	13536208	13554118	-	0	0	0	1	1	0
circRNA10139	845	chrNC_030826.1	13543819	13554118	-	0	0	0	1	0	0
circRNA1014	563	chrNC_030808.1	65684997	65687744	-	2	0	0	0	0	2
circRNA10140	276	chrNC_030826.1	14331021	14335696	-	0	0	0	1	0	0
circRNA10141	2250	chrNC_030826.1	17102395	17204453	+	0	0	0	1	0	0
circRNA10142	450	chrNC_030826.1	17127195	17144925	+	0	0	0	2	0	0
circRNA10143	599	chrNC_030826.1	17159224	17204453	+	0	0	0	1	0	0
circRNA10144	464	chrNC_030826.1	17376000	17383207	-	0	0	0	1	0	0
circRNA10145	503	chrNC_030826.1	17606625	17614880	-	0	0	0	6	8	0
circRNA10146	284	chrNC_030826.1	17821599	17825435	-	0	0	0	2	0	0
circRNA10147	546	chrNC_030826.1	17886266	17889974	+	0	0	0	2	0	1
circRNA10148	513	chrNC_030826.1	18294570	18298667	-	0	0	0	1	0	0
circRNA10149	398	chrNC_030826.1	19578266	19586538	+	0	0	0	1	0	0
circRNA1015	1406	chrNC_030808.1	65881786	65894753	-	5	5	7	1	7	4
circRNA10150	339	chrNC_030826.1	19652579	19653783	+	0	0	0	1	0	0
circRNA10151	789	chrNC_030826.1	19903010	19905690	-	0	0	0	2	0	2
circRNA10152	222	chrNC_030826.1	20571612	20571833	+	0	0	0	1	4	0
circRNA10153	359	chrNC_030826.1	20584034	20588135	+	0	0	0	3	0	0
circRNA10154	436	chrNC_030826.1	20592767	20600734	+	0	0	0	2	0	0
circRNA10155	532	chrNC_030826.1	21039623	21041539	+	0	0	0	1	0	0
circRNA10156	1023	chrNC_030826.1	21314913	21321041	+	0	0	0	2	0	0
circRNA10157	244	chrNC_030826.1	21978707	21988187	+	0	0	0	2	0	0
circRNA10158	772	chrNC_030826.1	22007153	22033315	+	0	0	0	2	0	0
circRNA10159	221	chrNC_030826.1	23331917	23332137	+	0	0	0	3	0	0
circRNA1016	405	chrNC_030808.1	65957336	65959806	-	1	0	0	0	0	1
circRNA10160	317	chrNC_030826.1	24270831	24272479	-	0	0	0	2	0	0
circRNA10161	614	chrNC_030826.1	25097242	25105041	+	0	0	0	4	1	1
circRNA10162	296	chrNC_030826.1	25943954	25944967	+	0	0	0	4	0	0
circRNA10163	1787	chrNC_030826.1	27817992	27828841	-	0	0	0	2	1	0
circRNA10164	533	chrNC_030826.1	27900321	27913985	-	0	0	0	1	0	0
circRNA10165	579	chrNC_030826.1	33519861	33521700	+	0	0	0	1	0	0
circRNA10166	762	chrNC_030826.1	33807597	33808358	-	0	0	0	1	0	0
circRNA10167	237	chrNC_030826.1	34916135	34916769	+	0	0	0	3	0	0
circRNA10168	650	chrNC_030826.1	35132035	35150285	-	0	0	0	3	0	12
circRNA10169	280	chrNC_030826.1	35150218	35155987	-	0	0	0	1	0	0
circRNA1017	505	chrNC_030808.1	66805380	66827464	+	1	0	0	0	3	0
circRNA10170	667	chrNC_030826.1	35357583	35396008	+	0	0	0	2	0	0
circRNA10171	362	chrNC_030826.1	35418463	35423441	+	0	0	0	2	0	0
circRNA10172	1125	chrNC_030826.1	35429362	35438867	+	0	0	0	1	0	0
circRNA10173	1203	chrNC_030826.1	35704589	35713758	-	0	0	0	1	0	0
circRNA10174	1681	chrNC_030826.1	36925513	36934392	+	0	0	0	1	0	0
circRNA10175	678	chrNC_030826.1	39532985	39538060	+	0	0	0	2	0	0
circRNA10176	1829	chrNC_030826.1	39532985	39554429	+	0	0	0	2	0	0
circRNA10177	4032	chrNC_030826.1	42772721	42790957	-	0	0	0	1	1	0
circRNA10178	307	chrNC_030826.1	42790818	42794159	-	0	0	0	1	0	0
circRNA10179	661	chrNC_030826.1	42825513	42827052	+	0	0	0	1	0	0
circRNA1018	435	chrNC_030808.1	66819424	66843323	+	1	1	1	1	4	0
circRNA10180	942	chrNC_030826.1	44547791	44551263	-	0	0	0	2	0	0
circRNA10181	707	chrNC_030826.1	45144856	45187257	-	0	0	0	2	0	0
circRNA10182	278	chrNC_030826.1	45237825	45241533	+	0	0	0	1	0	0
circRNA10183	1813	chrNC_030826.1	45844720	45863394	-	0	0	0	1	0	0
circRNA10184	350	chrNC_030826.1	45861568	45874128	-	0	0	0	1	0	2
circRNA10185	1496	chrNC_030826.1	46586086	46640887	+	0	0	0	1	0	0
circRNA10186	300	chrNC_030826.1	46597202	46602300	+	0	0	0	1	0	0
circRNA10187	492	chrNC_030826.1	46620210	46630866	+	0	0	0	1	0	0
circRNA10188	726	chrNC_030826.1	47222885	47256592	+	0	0	0	1	0	0
circRNA10189	577	chrNC_030826.1	47230809	47256592	+	0	0	0	1	0	0
circRNA1019	371	chrNC_030808.1	68591399	68605679	+	1	1	0	0	0	1
circRNA10190	770	chrNC_030826.1	47634102	47640135	-	0	0	0	1	0	0
circRNA10191	507	chrNC_030826.1	47697406	47698993	-	0	0	0	1	0	0
circRNA10192	245	chrNC_030826.1	47905984	47907458	-	0	0	0	1	0	0
circRNA10193	657	chrNC_030826.1	48366379	48377152	-	0	0	0	5	0	0
circRNA10194	236	chrNC_030826.1	48536100	48536484	-	0	0	0	1	0	0
circRNA10195	434	chrNC_030826.1	48643439	48649512	-	0	0	0	2	0	0
circRNA10196	402	chrNC_030826.1	49076124	49079594	+	0	0	0	2	0	0
circRNA10197	895	chrNC_030826.1	49390513	49458905	-	0	0	0	4	0	0
circRNA10198	877	chrNC_030826.1	49606439	49609387	-	0	0	0	1	3	0
circRNA10199	1157	chrNC_030826.1	49606863	49619855	-	0	0	0	1	0	0
circRNA102	2278	chrNC_030829.1	55314463	55396202	+	1	0	0	0	0	0
circRNA1020	265	chrNC_030808.1	68632383	68635017	+	3	0	4	0	0	0
circRNA10200	865	chrNC_030826.1	50083915	50097457	+	0	0	0	3	0	0
circRNA10201	414	chrNC_030826.1	50870807	50872464	+	0	0	0	1	0	0
circRNA10202	911	chrNC_030826.1	54483714	54490096	+	0	0	0	1	0	0
circRNA10203	563	chrNC_030826.1	60560328	60561973	+	0	0	0	1	0	0
circRNA10204	1065	chrNC_030826.1	61084614	61089658	+	0	0	0	1	0	0
circRNA10205	405	chrNC_030826.1	61433760	61498666	-	0	0	0	2	0	0
circRNA10206	660	chrNC_030826.1	61592538	61660567	-	0	0	0	1	0	0
circRNA10207	582	chrNC_030826.1	61659555	61678387	-	0	0	0	1	0	1
circRNA10208	1661	chrNC_030826.1	61659555	61736148	-	0	0	0	5	0	0
circRNA10209	960	chrNC_030826.1	61685820	61736148	-	0	0	0	2	0	0
circRNA1021	1117	chrNC_030808.1	68929663	68935907	+	4	3	0	0	4	5
circRNA10210	265	chrNC_030826.1	62419939	62422977	-	0	0	0	2	0	0
circRNA10211	893	chrNC_030824.1	108546	116483	-	0	0	0	1	0	0
circRNA10212	563	chrNC_030824.1	110874	115041	-	0	0	0	2	0	0
circRNA10213	449	chrNC_030824.1	903295	907273	-	0	0	0	3	0	1
circRNA10214	249	chrNC_030824.1	2470759	2472900	-	0	0	0	6	0	0
circRNA10215	1074	chrNC_030824.1	3086251	3109725	+	0	0	0	2	0	0
circRNA10216	689	chrNC_030824.1	3091098	3107293	+	0	0	0	1	0	0
circRNA10217	279	chrNC_030824.1	3143855	3144133	+	0	0	0	1	2	3
circRNA10218	508	chrNC_030824.1	3540101	3540608	+	0	0	0	1	0	0
circRNA10219	1364	chrNC_030824.1	4868252	4882741	+	0	0	0	1	0	0
circRNA1022	710	chrNC_030808.1	69047458	69077695	-	8	10	7	11	6	5
circRNA10220	413	chrNC_030824.1	5599104	5608280	-	0	0	0	2	1	5
circRNA10221	123	chrNC_030824.1	6841358	6841480	-	0	0	0	1	0	0
circRNA10222	414	chrNC_030824.1	8186007	8187551	-	0	0	0	3	0	0
circRNA10223	401	chrNC_030824.1	8602577	8605395	+	0	0	0	1	0	0
circRNA10224	469	chrNC_030824.1	8835305	8840173	+	0	0	0	4	0	0
circRNA10225	1510	chrNC_030824.1	9188204	9213693	-	0	0	0	2	0	0
circRNA10226	419	chrNC_030824.1	9892315	9898893	-	0	0	0	1	0	0
circRNA10227	846	chrNC_030824.1	14219720	14245197	-	0	0	0	3	0	0
circRNA10228	339	chrNC_030824.1	15908916	15916699	+	0	0	0	1	1	0
circRNA10229	539	chrNC_030824.1	18150910	18153395	-	0	0	0	1	0	0
circRNA1023	541	chrNC_030808.1	69059465	69077695	-	1	0	4	5	0	4
circRNA10230	895	chrNC_030824.1	18261963	18272844	-	0	0	0	2	1	2
circRNA10231	407	chrNC_030824.1	18287266	18291036	-	0	0	0	1	0	0
circRNA10232	1575	chrNC_030824.1	18944773	18960660	-	0	0	0	2	2	0
circRNA10233	1033	chrNC_030824.1	19192869	19207589	+	0	0	0	2	0	0
circRNA10234	1076	chrNC_030824.1	19241961	19251519	+	0	0	0	1	0	0
circRNA10235	1269	chrNC_030824.1	19787205	19809968	-	0	0	0	2	0	0
circRNA10236	333	chrNC_030824.1	19841568	19847779	-	0	0	0	1	0	0
circRNA10237	471	chrNC_030824.1	19860242	19892862	-	0	0	0	2	0	0
circRNA10238	300	chrNC_030824.1	20222292	20225733	-	0	0	0	4	0	0
circRNA10239	806	chrNC_030824.1	28614667	28711449	-	0	0	0	2	0	0
circRNA1024	291	chrNC_030808.1	69069565	69077695	-	1	0	0	0	0	0
circRNA10240	181	chrNC_030824.1	28663643	28663823	-	0	0	0	4	0	0
circRNA10241	556	chrNC_030824.1	30900175	30908354	+	0	0	0	1	0	0
circRNA10242	244	chrNC_030824.1	31309386	31311489	+	0	0	0	2	4	0
circRNA10243	805	chrNC_030824.1	35332655	35347157	-	0	0	0	3	0	0
circRNA10244	1713	chrNC_030824.1	35715654	35734695	+	0	0	0	2	0	0
circRNA10245	1711	chrNC_030824.1	38684738	38694897	+	0	0	0	3	0	2
circRNA10246	1163	chrNC_030824.1	41109945	41132009	+	0	0	0	1	0	0
circRNA10247	722	chrNC_030824.1	41753695	41770937	+	0	0	0	4	0	0
circRNA10248	361	chrNC_030824.1	41918158	41928712	-	0	0	0	1	1	0
circRNA10249	242	chrNC_030824.1	51566817	51575500	-	0	0	0	1	0	0
circRNA1025	1290	chrNC_030808.1	69236368	69246159	-	1	0	0	0	0	0
circRNA10250	392	chrNC_030824.1	52812601	52817683	-	0	0	0	2	2	0
circRNA10251	232	chrNC_030824.1	54439668	54440542	+	0	0	0	1	0	0
circRNA10252	814	chrNC_030824.1	55208695	55242421	-	0	0	0	1	0	0
circRNA10253	295	chrNC_030824.1	56537236	56537530	+	0	0	0	1	0	0
circRNA10254	715	chrNC_030824.1	58511912	58530947	-	0	0	0	1	0	0
circRNA10255	296	chrNC_030824.1	59171649	59187860	-	0	0	0	1	0	0
circRNA10256	1249	chrNC_030824.1	60407301	60419685	-	0	0	0	1	0	0
circRNA10257	1110	chrNC_030824.1	63950364	63968427	-	0	0	0	3	0	0
circRNA10258	587	chrNC_030824.1	64819176	64855600	-	0	0	0	2	0	0
circRNA10259	1057	chrNC_030824.1	66468214	66471216	+	0	0	0	2	0	0
circRNA1026	588	chrNC_030808.1	69243856	69246159	-	3	4	0	0	0	2
circRNA10260	250	chrNC_030824.1	67958233	67959521	-	0	0	0	3	0	0
circRNA10261	348	chrNC_030808.1	260200	267284	-	0	0	0	2	0	0
circRNA10262	318	chrNC_030808.1	538040	539071	-	0	0	0	2	2	1
circRNA10263	491	chrNC_030808.1	1345783	1346955	+	0	0	0	4	0	0
circRNA10264	527	chrNC_030808.1	1388188	1394829	+	0	0	0	3	0	0
circRNA10265	593	chrNC_030808.1	8831857	8859456	+	0	0	0	2	0	4
circRNA10266	1162	chrNC_030808.1	9073414	9094506	-	0	0	0	1	4	0
circRNA10267	579	chrNC_030808.1	9083859	9094506	-	0	0	0	3	0	0
circRNA10268	411	chrNC_030808.1	9129841	9135256	-	0	0	0	1	0	0
circRNA10269	1414	chrNC_030808.1	19824288	19852036	-	0	0	0	2	0	0
circRNA1027	900	chrNC_030808.1	69493384	69548742	-	3	0	0	0	0	0
circRNA10270	896	chrNC_030808.1	19839369	19898849	-	0	0	0	3	0	0
circRNA10271	307	chrNC_030808.1	19898766	19907621	-	0	0	0	6	0	0
circRNA10272	849	chrNC_030808.1	27969213	28065245	-	0	0	0	1	1	0
circRNA10273	525	chrNC_030808.1	36994058	37004698	-	0	0	0	1	0	0
circRNA10274	1083	chrNC_030808.1	37069458	37111079	+	0	0	0	1	0	0
circRNA10275	186	chrNC_030808.1	37109929	37111079	+	0	0	0	5	0	0
circRNA10276	153	chrNC_030808.1	42823244	42823396	+	0	0	0	3	0	0
circRNA10277	516	chrNC_030808.1	42910040	42916152	-	0	0	0	1	0	0
circRNA10278	929	chrNC_030808.1	44391690	44409006	+	0	0	0	2	0	0
circRNA10279	937	chrNC_030808.1	45597694	45626226	-	0	0	0	3	0	0
circRNA1028	683	chrNC_030808.1	69493384	69530360	-	10	13	10	0	13	0
circRNA10280	647	chrNC_030808.1	50200527	50212707	-	0	0	0	1	0	0
circRNA10281	220	chrNC_030808.1	50247811	50250902	-	0	0	0	1	0	0
circRNA10282	417	chrNC_030808.1	50254524	50263935	-	0	0	0	1	1	4
circRNA10283	815	chrNC_030808.1	50254524	50364574	-	0	0	0	1	0	0
circRNA10284	532	chrNC_030808.1	52181693	52236204	+	0	0	0	2	0	0
circRNA10285	1564	chrNC_030808.1	53182653	53195454	-	0	0	0	1	0	0
circRNA10286	2012	chrNC_030808.1	56407610	56441171	+	0	0	0	1	0	0
circRNA10287	501	chrNC_030808.1	56460291	56468502	+	0	0	0	1	0	0
circRNA10288	1067	chrNC_030808.1	57925203	57936445	-	0	0	0	2	0	1
circRNA10289	321	chrNC_030808.1	58176034	58177070	-	0	0	0	3	0	0
circRNA1029	349	chrNC_030808.1	69530012	69530360	-	1	0	0	4	0	1
circRNA10290	889	chrNC_030808.1	58465750	58489938	-	0	0	0	2	0	0
circRNA10291	387	chrNC_030808.1	63877814	63892424	+	0	0	0	4	0	0
circRNA10292	307	chrNC_030808.1	63932746	63937781	-	0	0	0	3	0	0
circRNA10293	543	chrNC_030808.1	64380743	64413475	-	0	0	0	1	0	0
circRNA10294	531	chrNC_030808.1	64403979	64435190	-	0	0	0	1	0	0
circRNA10295	492	chrNC_030808.1	64643028	64653148	-	0	0	0	1	0	0
circRNA10296	701	chrNC_030808.1	66805380	66843323	+	0	0	0	2	0	0
circRNA10297	311	chrNC_030808.1	66843196	66863087	+	0	0	0	1	0	0
circRNA10298	215	chrNC_030808.1	67166655	67169983	+	0	0	0	2	0	2
circRNA10299	291	chrNC_030808.1	68933857	68935907	+	0	0	0	1	0	0
circRNA103	371	chrNC_030829.1	55317021	55318868	+	11	12	0	8	14	0
circRNA1030	485	chrNC_030808.1	69530012	69539989	-	1	0	3	0	9	2
circRNA10300	969	chrNC_030808.1	69316980	69332910	-	0	0	0	1	0	0
circRNA10301	475	chrNC_030808.1	69503316	69530360	-	0	0	0	1	0	0
circRNA10302	566	chrNC_030808.1	69530012	69548742	-	0	0	0	1	4	0
circRNA10303	414	chrNC_030808.1	69902905	69908816	-	0	0	0	2	1	2
circRNA10304	395	chrNC_030808.1	70697443	70712923	-	0	0	0	1	0	1
circRNA10305	747	chrNC_030808.1	79904311	79913187	-	0	0	0	1	1	0
circRNA10306	432	chrNC_030808.1	80129861	80137678	+	0	0	0	3	0	0
circRNA10307	649	chrNC_030808.1	81216836	81235615	+	0	0	0	1	0	0
circRNA10308	1841	chrNC_030808.1	81967863	82057498	-	0	0	0	2	0	0
circRNA10309	1033	chrNC_030808.1	82544327	82546285	-	0	0	0	1	0	0
circRNA1031	713	chrNC_030808.1	69668367	69696696	-	2	0	0	0	0	0
circRNA10310	1023	chrNC_030808.1	83159501	83162902	-	0	0	0	2	0	0
circRNA10311	211	chrNC_030808.1	83430561	83433010	+	0	0	0	1	0	0
circRNA10312	627	chrNC_030808.1	83442316	83454519	+	0	0	0	1	0	0
circRNA10313	319	chrNC_030808.1	83865186	83868272	-	0	0	0	2	0	0
circRNA10314	496	chrNC_030808.1	87363041	87366048	+	0	0	0	1	0	0
circRNA10315	840	chrNC_030808.1	87390004	87394865	-	0	0	0	2	0	0
circRNA10316	755	chrNC_030808.1	87536799	87544611	-	0	0	0	1	0	0
circRNA10317	447	chrNC_030808.1	87663367	87684985	+	0	0	0	3	3	2
circRNA10318	598	chrNC_030808.1	94742770	94750149	-	0	0	0	1	0	0
circRNA10319	258	chrNC_030808.1	96760493	96762966	+	0	0	0	5	0	0
circRNA1032	827	chrNC_030808.1	69753767	69763848	-	2	0	0	0	0	0
circRNA10320	1096	chrNC_030808.1	97817837	97843644	+	0	0	0	1	0	0
circRNA10321	421	chrNC_030808.1	97842397	97843644	+	0	0	0	2	0	0
circRNA10322	1918	chrNC_030808.1	106588582	106601387	-	0	0	0	1	0	0
circRNA10323	1005	chrNC_030808.1	106625314	106683713	+	0	0	0	1	1	0
circRNA10324	1446	chrNC_030808.1	106683534	106731460	+	0	0	0	1	0	1
circRNA10325	1177	chrNC_030808.1	113037707	113154407	-	0	0	0	1	4	0
circRNA10326	320	chrNC_030808.1	113058929	113077478	-	0	0	0	1	0	0
circRNA10327	722	chrNC_030808.1	113077404	113154407	-	0	0	0	1	0	0
circRNA10328	838	chrNC_030808.1	114992027	115015993	-	0	0	0	1	2	4
circRNA10329	236	chrNC_030808.1	121854538	121854773	+	0	0	0	1	0	0
circRNA1033	414	chrNC_030808.1	70012056	70015399	-	2	0	1	3	0	0
circRNA10330	393	chrNC_030808.1	121976892	121993939	+	0	0	0	2	0	0
circRNA10331	162	chrNC_030808.1	122000838	122002234	+	0	0	0	1	0	0
circRNA10332	700	chrNC_030808.1	122028653	122039022	+	0	0	0	2	0	0
circRNA10333	1157	chrNC_030808.1	125526938	125538623	-	0	0	0	2	0	0
circRNA10334	518	chrNC_030808.1	125742222	125752055	+	0	0	0	3	0	0
circRNA10335	3154	chrNC_030808.1	126020412	126062040	+	0	0	0	2	0	0
circRNA10336	508	chrNC_030808.1	126167183	126173506	+	0	0	0	1	0	4
circRNA10337	898	chrNC_030808.1	126301945	126325763	+	0	0	0	5	0	0
circRNA10338	274	chrNC_030808.1	126500527	126507726	+	0	0	0	4	0	0
circRNA10339	390	chrNC_030808.1	127101396	127135261	-	0	0	0	1	0	0
circRNA1034	643	chrNC_030808.1	70029441	70045110	-	5	0	2	0	0	0
circRNA10340	371	chrNC_030808.1	132818277	132826881	-	0	0	0	2	0	0
circRNA10341	580	chrNC_030808.1	134379278	134408570	-	0	0	0	3	1	0
circRNA10342	1652	chrNC_030808.1	136456158	136485217	+	0	0	0	1	0	0
circRNA10343	821	chrNC_030808.1	136695051	136701340	-	0	0	0	3	0	0
circRNA10344	1281	chrNC_030808.1	136778124	136792692	-	0	0	0	1	0	0
circRNA10345	187	chrNC_030808.1	138042283	138044453	+	0	0	0	3	0	0
circRNA10346	389	chrNC_030808.1	138525222	138529506	-	0	0	0	1	0	0
circRNA10347	4169	chrNC_030808.1	138890280	138972203	-	0	0	0	1	0	0
circRNA10348	1046	chrNC_030808.1	138948985	138972203	-	0	0	0	1	0	0
circRNA10349	482	chrNC_030808.1	138968000	138970003	-	0	0	0	1	0	0
circRNA1035	890	chrNC_030808.1	70029441	70052993	-	2	9	5	0	5	2
circRNA10350	543	chrNC_030808.1	141258255	141261856	+	0	0	0	2	0	0
circRNA10351	801	chrNC_030808.1	146114083	146129450	+	0	0	0	2	0	0
circRNA10352	454	chrNC_030808.1	146914668	146961367	-	0	0	0	4	0	0
circRNA10353	353	chrNC_030808.1	148375045	148375957	+	0	0	0	1	0	2
circRNA10354	317	chrNC_030808.1	148445501	148448521	+	0	0	0	1	0	0
circRNA10355	2036	chrNC_030808.1	149269290	149284860	+	0	0	0	2	0	0
circRNA10356	409	chrNC_030808.1	150634159	150801687	-	0	0	0	3	0	0
circRNA10357	1446	chrNC_030808.1	157111670	157157831	+	0	0	0	1	3	0
circRNA10358	1557	chrNC_030808.1	157111670	157169829	+	0	0	0	2	0	0
circRNA10359	1917	chrNC_030808.1	157111670	157179644	+	0	0	0	7	0	0
circRNA1036	270	chrNC_030808.1	70042056	70043810	-	1	0	0	0	2	0
circRNA10360	417	chrNC_030812.1	1298669	1319358	+	0	0	0	1	0	0
circRNA10361	460	chrNC_030812.1	1384406	1406442	+	0	0	0	6	3	0
circRNA10362	616	chrNC_030812.1	4816534	4822393	-	0	0	0	1	0	0
circRNA10363	804	chrNC_030812.1	5983002	6023604	+	0	0	0	2	0	0
circRNA10364	1239	chrNC_030812.1	7244440	7260129	+	0	0	0	2	0	0
circRNA10365	1899	chrNC_030812.1	7247767	7308412	+	0	0	0	2	0	0
circRNA10366	2327	chrNC_030812.1	7381386	7454612	+	0	0	0	1	0	0
circRNA10367	599	chrNC_030812.1	7437373	7441998	+	0	0	0	4	0	0
circRNA10368	1356	chrNC_030812.1	9154453	9176508	-	0	0	0	1	0	0
circRNA10369	669	chrNC_030812.1	12250675	12338205	+	0	0	0	3	0	0
circRNA1037	989	chrNC_030808.1	70042056	70058752	-	1	0	0	0	0	0
circRNA10370	1072	chrNC_030812.1	17702601	17716664	-	0	0	0	2	0	0
circRNA10371	270	chrNC_030812.1	22449527	22452104	-	0	0	0	2	0	0
circRNA10372	1380	chrNC_030812.1	23860039	23899051	-	0	0	0	6	4	0
circRNA10373	451	chrNC_030812.1	25522872	25523553	-	0	0	0	1	0	0
circRNA10374	525	chrNC_030812.1	26238888	26241560	+	0	0	0	1	0	0
circRNA10375	654	chrNC_030812.1	26667889	26672658	-	0	0	0	2	0	0
circRNA10376	344	chrNC_030812.1	28411109	28412127	+	0	0	0	1	0	0
circRNA10377	1118	chrNC_030812.1	28856852	28879415	-	0	0	0	1	0	0
circRNA10378	335	chrNC_030812.1	33471247	33476056	+	0	0	0	3	0	9
circRNA10379	776	chrNC_030812.1	34452848	34472427	-	0	0	0	1	0	0
circRNA1038	1912	chrNC_030808.1	71102881	71117943	+	2	0	0	0	0	0
circRNA10380	409	chrNC_030812.1	37878128	37881304	+	0	0	0	1	0	0
circRNA10381	358	chrNC_030812.1	40117794	40118562	-	0	0	0	1	0	0
circRNA10382	729	chrNC_030812.1	40490044	40765017	+	0	0	0	3	0	0
circRNA10383	339	chrNC_030812.1	41841161	41881467	+	0	0	0	1	0	0
circRNA10384	460	chrNC_030812.1	43950436	43953755	-	0	0	0	1	0	0
circRNA10385	447	chrNC_030812.1	48458932	48463296	-	0	0	0	3	1	0
circRNA10386	725	chrNC_030812.1	48637703	48651256	-	0	0	0	2	0	0
circRNA10387	748	chrNC_030812.1	48689443	48698206	-	0	0	0	2	0	0
circRNA10388	384	chrNC_030812.1	55594809	55595570	-	0	0	0	2	0	0
circRNA10389	252	chrNC_030812.1	56537839	56538181	-	0	0	0	2	0	0
circRNA1039	371	chrNC_030808.1	71111108	71117943	+	1	0	0	0	0	0
circRNA10390	457	chrNC_030812.1	59527031	59540779	+	0	0	0	1	0	0
circRNA10391	1172	chrNC_030812.1	59671377	59698440	+	0	0	0	2	0	0
circRNA10392	594	chrNC_030812.1	62814807	62821039	-	0	0	0	3	0	1
circRNA10393	470	chrNC_030812.1	63869353	63874894	+	0	0	0	1	0	0
circRNA10394	478	chrNC_030812.1	66349177	66353522	-	0	0	0	11	0	0
circRNA10395	355	chrNC_030812.1	69658696	69660929	-	0	0	0	2	0	0
circRNA10396	697	chrNC_030812.1	70782816	70935668	-	0	0	0	1	0	0
circRNA10397	316	chrNC_030812.1	73633660	73635109	-	0	0	0	1	0	0
circRNA10398	667	chrNC_030812.1	77031080	77031746	+	0	0	0	3	2	1
circRNA10399	609	chrNC_030812.1	77064384	77092816	+	0	0	0	1	0	0
circRNA104	756	chrNC_030829.1	55970906	55975521	+	5	0	13	6	0	3
circRNA1040	368	chrNC_030808.1	71264560	71273737	-	1	0	0	0	1	0
circRNA10400	453	chrNC_030812.1	77356108	77358606	+	0	0	0	1	0	0
circRNA10401	978	chrNC_030812.1	77388107	77405279	+	0	0	0	2	0	0
circRNA10402	656	chrNC_030812.1	79923660	80021906	-	0	0	0	3	1	0
circRNA10403	369	chrNC_030812.1	80717892	80719464	-	0	0	0	1	0	0
circRNA10404	440	chrNC_030812.1	81485871	81488578	+	0	0	0	1	0	0
circRNA10405	531	chrNC_030812.1	81993485	82001475	+	0	0	0	2	0	0
circRNA10406	1768	chrNC_030812.1	89174155	89230769	-	0	0	0	1	0	0
circRNA10407	1855	chrNC_030812.1	94029088	94042196	-	0	0	0	1	0	0
circRNA10408	2188	chrNC_030812.1	96280190	96310548	+	0	0	0	1	0	0
circRNA10409	597	chrNC_030812.1	97557255	97569113	+	0	0	0	1	0	0
circRNA1041	381	chrNC_030808.1	71308110	71328596	-	9	8	9	14	16	19
circRNA10410	254	chrNC_030812.1	98481320	98483582	+	0	0	0	2	0	0
circRNA10411	991	chrNC_030812.1	102674815	102687840	+	0	0	0	2	0	0
circRNA10412	345	chrNC_030812.1	104514600	104516871	+	0	0	0	2	0	0
circRNA10413	336	chrNC_030812.1	106782483	106790563	+	0	0	0	5	0	4
circRNA10414	1259	chrNC_030812.1	106782483	106859169	+	0	0	0	2	1	0
circRNA10415	476	chrNC_030812.1	106806481	106809648	+	0	0	0	1	0	0
circRNA10416	251	chrNC_030812.1	109097456	109098148	-	0	0	0	3	0	0
circRNA10417	442	chrNC_030812.1	110963501	110967146	-	0	0	0	1	0	0
circRNA10418	391	chrNC_030812.1	111397124	111398378	+	0	0	0	1	0	0
circRNA10419	1309	chrNC_030812.1	111529427	111542507	+	0	0	0	3	0	0
circRNA1042	960	chrNC_030808.1	71320929	71368349	-	1	0	0	0	2	0
circRNA10420	163	chrNC_030812.1	114516024	114518148	+	0	0	0	4	0	0
circRNA10421	761	chrNC_030812.1	118640880	118669313	-	0	0	0	1	0	0
circRNA10422	695	chrNC_030812.1	118642072	118669313	-	0	0	0	1	0	0
circRNA10423	1184	chrNC_030810.1	402190	403373	+	0	0	0	1	1	0
circRNA10424	552	chrNC_030810.1	650439	654327	+	0	0	0	1	0	0
circRNA10425	487	chrNC_030810.1	651551	654327	+	0	0	0	5	0	0
circRNA10426	568	chrNC_030810.1	3521139	3532928	-	0	0	0	9	0	0
circRNA10427	2403	chrNC_030810.1	3897236	3906533	+	0	0	0	3	0	0
circRNA10428	328	chrNC_030810.1	5321967	5341818	-	0	0	0	1	1	4
circRNA10429	2360	chrNC_030810.1	6163033	6165392	-	0	0	0	1	0	0
circRNA1043	278	chrNC_030808.1	71320929	71328596	-	8	4	2	12	9	14
circRNA10430	906	chrNC_030810.1	8271952	8278186	-	0	0	0	1	0	0
circRNA10431	567	chrNC_030810.1	8277468	8278204	-	0	0	0	2	0	0
circRNA10432	180	chrNC_030810.1	8282050	8282229	-	0	0	0	1	0	0
circRNA10433	924	chrNC_030810.1	10143159	10149266	-	0	0	0	2	0	0
circRNA10434	512	chrNC_030810.1	10597187	10597698	-	0	0	0	2	0	0
circRNA10435	302	chrNC_030810.1	10878130	10878664	+	0	0	0	1	0	0
circRNA10436	683	chrNC_030810.1	11059658	11067147	+	0	0	0	1	0	0
circRNA10437	6108	chrNC_030810.1	14094231	14104087	+	0	0	0	1	1	0
circRNA10438	282	chrNC_030810.1	14196126	14196907	+	0	0	0	1	0	0
circRNA10439	507	chrNC_030810.1	14303728	14306501	-	0	0	0	3	0	0
circRNA1044	1391	chrNC_030808.1	71320929	71491736	-	2	0	0	0	0	0
circRNA10440	370	chrNC_030810.1	14871339	14875809	+	0	0	0	2	0	4
circRNA10441	1100	chrNC_030810.1	17185185	17218216	+	0	0	0	1	0	0
circRNA10442	278	chrNC_030810.1	19064075	19064352	-	0	0	0	1	0	0
circRNA10443	513	chrNC_030810.1	19528995	19530542	+	0	0	0	1	0	0
circRNA10444	318	chrNC_030810.1	20069879	20127935	-	0	0	0	3	0	0
circRNA10445	494	chrNC_030810.1	20327979	20335661	-	0	0	0	2	0	0
circRNA10446	407	chrNC_030810.1	20661652	20670249	+	0	0	0	1	0	0
circRNA10447	189	chrNC_030810.1	20973111	20974038	+	0	0	0	3	0	0
circRNA10448	322	chrNC_030810.1	22352614	22359700	-	0	0	0	2	0	0
circRNA10449	458	chrNC_030810.1	22895495	22949678	-	0	0	0	3	0	0
circRNA1045	628	chrNC_030808.1	71339030	71354409	-	2	0	0	0	0	0
circRNA10450	708	chrNC_030810.1	22920280	22955029	-	0	0	0	2	0	0
circRNA10451	464	chrNC_030810.1	25037765	25108024	-	0	0	0	1	0	0
circRNA10452	732	chrNC_030810.1	25862227	25893142	-	0	0	0	2	0	0
circRNA10453	1015	chrNC_030810.1	25880708	25899383	-	0	0	0	4	0	0
circRNA10454	945	chrNC_030810.1	25885169	25899383	-	0	0	0	3	0	0
circRNA10455	277	chrNC_030810.1	26731647	26734336	+	0	0	0	1	3	0
circRNA10456	1155	chrNC_030810.1	26731647	26756958	+	0	0	0	2	2	0
circRNA10457	1098	chrNC_030810.1	26842868	26853041	-	0	0	0	3	0	0
circRNA10458	2820	chrNC_030810.1	26908088	26955056	-	0	0	0	1	0	0
circRNA10459	489	chrNC_030810.1	29356900	29359200	-	0	0	0	2	0	0
circRNA1046	537	chrNC_030808.1	71344983	71368349	-	1	0	0	3	1	0
circRNA10460	501	chrNC_030810.1	29591459	29602716	-	0	0	0	2	0	2
circRNA10461	1534	chrNC_030810.1	33269562	33308594	-	0	0	0	1	0	0
circRNA10462	1711	chrNC_030810.1	33419592	33439652	-	0	0	0	2	0	0
circRNA10463	1112	chrNC_030810.1	33433526	33443021	-	0	0	0	1	1	0
circRNA10464	450	chrNC_030810.1	36505585	36561206	+	0	0	0	2	0	0
circRNA10465	299	chrNC_030810.1	37030052	37035796	+	0	0	0	2	0	0
circRNA10466	1538	chrNC_030810.1	37932575	37957950	-	0	0	0	3	6	1
circRNA10467	413	chrNC_030810.1	38131424	38142779	+	0	0	0	2	0	0
circRNA10468	171	chrNC_030810.1	38753020	38755323	+	0	0	0	2	0	0
circRNA10469	436	chrNC_030810.1	38789011	38828696	-	0	0	0	2	0	0
circRNA1047	400	chrNC_030808.1	71992448	72008177	+	1	0	5	0	0	0
circRNA10470	365	chrNC_030810.1	40123633	40125132	+	0	0	0	1	0	1
circRNA10471	909	chrNC_030810.1	40264006	40295967	+	0	0	0	1	0	0
circRNA10472	533	chrNC_030810.1	40278410	40284666	+	0	0	0	1	0	0
circRNA10473	572	chrNC_030810.1	40278413	40284666	+	0	0	0	1	0	0
circRNA10474	785	chrNC_030810.1	40381683	40394313	-	0	0	0	1	0	0
circRNA10475	406	chrNC_030810.1	40394190	40403985	-	0	0	0	3	0	0
circRNA10476	510	chrNC_030810.1	41103760	41110929	+	0	0	0	2	0	0
circRNA10477	484	chrNC_030810.1	42989232	42990963	-	0	0	0	1	0	3
circRNA10478	449	chrNC_030810.1	46021453	46035760	-	0	0	0	2	0	0
circRNA10479	288	chrNC_030810.1	46114204	46119280	+	0	0	0	1	0	0
circRNA1048	576	chrNC_030808.1	72001143	72023311	+	4	0	6	1	2	1
circRNA10480	477	chrNC_030810.1	51837507	51845133	+	0	0	0	2	0	2
circRNA10481	673	chrNC_030810.1	54110440	54117089	-	0	0	0	7	0	0
circRNA10482	475	chrNC_030810.1	54113446	54117089	-	0	0	0	7	3	0
circRNA10483	576	chrNC_030810.1	54332269	54343297	+	0	0	0	1	0	0
circRNA10484	307	chrNC_030810.1	54425305	54427355	+	0	0	0	3	3	6
circRNA10485	606	chrNC_030810.1	54468278	54477035	-	0	0	0	1	0	0
circRNA10486	343	chrNC_030810.1	55192130	55192632	+	0	0	0	1	0	0
circRNA10487	454	chrNC_030810.1	61034380	61039951	-	0	0	0	2	0	0
circRNA10488	228	chrNC_030810.1	62791858	62794678	-	0	0	0	1	0	0
circRNA10489	983	chrNC_030810.1	63539683	63552638	-	0	0	0	4	0	0
circRNA1049	535	chrNC_030808.1	72830742	72836639	+	1	0	0	0	0	0
circRNA10490	281	chrNC_030810.1	66157533	66160294	-	0	0	0	1	0	0
circRNA10491	1547	chrNC_030810.1	68914551	68935308	-	0	0	0	1	0	0
circRNA10492	1126	chrNC_030810.1	68922927	68935308	-	0	0	0	1	0	0
circRNA10493	549	chrNC_030810.1	69275324	69298384	+	0	0	0	3	0	0
circRNA10494	2025	chrNC_030810.1	69298267	69350507	+	0	0	0	5	0	0
circRNA10495	578	chrNC_030810.1	69298267	69329435	+	0	0	0	1	1	0
circRNA10496	757	chrNC_030810.1	70656222	70658436	-	0	0	0	1	0	0
circRNA10497	368	chrNC_030810.1	70729468	70757908	-	0	0	0	7	5	8
circRNA10498	486	chrNC_030810.1	75914012	75922181	+	0	0	0	1	0	0
circRNA10499	240	chrNC_030810.1	75922095	75973157	+	0	0	0	1	2	0
circRNA105	935	chrNC_030829.1	56061029	56061963	+	15	23	7	18	8	18
circRNA1050	504	chrNC_030808.1	72836515	72839554	+	1	4	7	4	1	10
circRNA10500	432	chrNC_030810.1	80049008	80057599	-	0	0	0	5	0	0
circRNA10501	438	chrNC_030810.1	89922450	89929406	+	0	0	0	1	0	0
circRNA10502	867	chrNC_030810.1	90201266	90202132	-	0	0	0	1	0	0
circRNA10503	1272	chrNC_030810.1	90201266	90208825	-	0	0	0	1	0	0
circRNA10504	1725	chrNC_030810.1	90771039	90820586	+	0	0	0	2	0	0
circRNA10505	598	chrNC_030810.1	90874322	90878745	-	0	0	0	1	0	0
circRNA10506	267	chrNC_030810.1	92899971	92901681	+	0	0	0	2	0	0
circRNA10507	153	chrNC_030810.1	93782057	93789695	-	0	0	0	2	0	0
circRNA10508	1109	chrNC_030810.1	94396166	94408268	+	0	0	0	2	0	0
circRNA10509	1728	chrNC_030810.1	97212843	97255177	-	0	0	0	1	1	0
circRNA1051	646	chrNC_030808.1	73578288	73582542	-	2	1	0	0	2	0
circRNA10510	418	chrNC_030810.1	97452553	97459904	-	0	0	0	1	1	1
circRNA10511	366	chrNC_030810.1	98962860	98984516	-	0	0	0	3	0	0
circRNA10512	612	chrNC_030810.1	99129462	99132039	+	0	0	0	2	0	0
circRNA10513	219	chrNC_030810.1	100211334	100211552	-	0	0	0	1	0	0
circRNA10514	595	chrNC_030810.1	101012207	101037663	+	0	0	0	3	0	0
circRNA10515	743	chrNC_030810.1	103842830	103853088	+	0	0	0	3	0	0
circRNA10516	420	chrNC_030810.1	103867272	103868781	+	0	0	0	1	0	0
circRNA10517	2102	chrNC_030810.1	104162317	104167468	-	0	0	0	1	0	0
circRNA10518	275	chrNC_030810.1	104883441	104925331	-	0	0	0	1	0	0
circRNA10519	297	chrNC_030810.1	105472929	105473508	+	0	0	0	1	0	0
circRNA1052	399	chrNC_030808.1	75731776	75745838	-	18	25	23	35	17	31
circRNA10520	395	chrNC_030810.1	105773451	105774457	-	0	0	0	3	0	2
circRNA10521	300	chrNC_030810.1	107767180	107769267	+	0	0	0	3	0	0
circRNA10522	672	chrNC_030810.1	112952021	113022622	+	0	0	0	2	0	0
circRNA10523	815	chrNC_030810.1	113246689	113259417	+	0	0	0	1	0	0
circRNA10524	486	chrNC_030810.1	113443986	113445167	+	0	0	0	1	0	0
circRNA10525	744	chrNC_030810.1	119404919	119444051	+	0	0	0	1	0	0
circRNA10526	1489	chrNC_030810.1	119439044	119493614	+	0	0	0	1	0	0
circRNA10527	475	chrNC_030810.1	119450852	119454164	+	0	0	0	2	0	0
circRNA10528	706	chrNC_030810.1	119473360	119494165	+	0	0	0	4	0	0
circRNA10529	257	chrNW_017189851.1	312519	313438	-	0	0	0	4	0	0
circRNA1053	281	chrNC_030808.1	75741521	75745838	-	5	0	0	3	0	0
circRNA10530	492	chrNW_017189851.1	351255	355621	-	0	0	0	2	0	0
circRNA10531	646	chrNC_030828.1	6507952	6558163	-	0	0	0	1	0	0
circRNA10532	810	chrNC_030828.1	13376989	13382766	-	0	0	0	2	0	3
circRNA10533	951	chrNC_030828.1	13376989	13384460	-	0	0	0	2	2	0
circRNA10534	1161	chrNC_030828.1	13379357	13417792	-	0	0	0	2	0	0
circRNA10535	486	chrNC_030828.1	13387424	13399888	-	0	0	0	1	0	0
circRNA10536	358	chrNC_030828.1	20071216	20072899	+	0	0	0	1	0	0
circRNA10537	402	chrNC_030828.1	21419559	21420956	-	0	0	0	2	4	0
circRNA10538	614	chrNC_030828.1	21429849	21434841	-	0	0	0	2	0	0
circRNA10539	986	chrNC_030828.1	23409952	23410937	-	0	0	0	2	0	4
circRNA1054	473	chrNC_030808.1	76396786	76401607	-	3	0	1	0	0	0
circRNA10540	1553	chrNC_030828.1	26360750	26387721	+	0	0	0	1	0	0
circRNA10541	469	chrNC_030828.1	26366125	26371188	+	0	0	0	1	0	0
circRNA10542	210	chrNC_030828.1	26387512	26387721	+	0	0	0	1	0	0
circRNA10543	854	chrNC_030828.1	29927222	29937443	+	0	0	0	3	0	0
circRNA10544	777	chrNC_030828.1	31114870	31129209	-	0	0	0	2	6	2
circRNA10545	480	chrNC_030828.1	31429280	31457293	-	0	0	0	4	0	0
circRNA10546	1254	chrNC_030828.1	31454999	31483958	-	0	0	0	3	0	0
circRNA10547	1077	chrNC_030828.1	31488946	31541177	-	0	0	0	2	0	0
circRNA10548	806	chrNC_030828.1	33278673	33284159	+	0	0	0	2	7	0
circRNA10549	531	chrNC_030828.1	33459841	33463972	+	0	0	0	1	0	0
circRNA1055	987	chrNC_030808.1	78281233	78447723	-	2	0	5	0	1	0
circRNA10550	336	chrNC_030828.1	33472492	33472827	+	0	0	0	1	3	2
circRNA10551	436	chrNC_030828.1	33698418	33701732	+	0	0	0	2	0	0
circRNA10552	332	chrNC_030828.1	40739251	40745678	+	0	0	0	1	0	0
circRNA10553	528	chrNC_030828.1	41019884	41035359	-	0	0	0	3	0	3
circRNA10554	282	chrNC_030828.1	41171166	41171967	-	0	0	0	1	0	0
circRNA10555	377	chrNC_030828.1	41284716	41286133	-	0	0	0	1	2	0
circRNA10556	3424	chrNC_030828.1	41302090	41352303	-	0	0	0	2	0	0
circRNA10557	3285	chrNC_030828.1	41306961	41352303	-	0	0	0	2	0	0
circRNA10558	454	chrNC_030828.1	41312050	41314931	-	0	0	0	3	0	0
circRNA10559	1000	chrNC_030828.1	41314014	41329826	-	0	0	0	3	0	0
circRNA1056	817	chrNC_030808.1	78350136	78447723	-	2	0	0	0	4	0
circRNA10560	2588	chrNC_030828.1	45236536	45286943	-	0	0	0	1	0	0
circRNA10561	1327	chrNC_030828.1	54715891	54717217	-	0	0	0	2	0	0
circRNA10562	1514	chrNC_030828.1	54946419	54986368	+	0	0	0	1	1	0
circRNA10563	1061	chrNC_030828.1	55976068	55993496	-	0	0	0	1	0	0
circRNA10564	4881	chrNC_030828.1	56157166	56198533	-	0	0	0	1	0	0
circRNA10565	1425	chrNC_030828.1	59317017	59325156	-	0	0	0	1	0	0
circRNA10566	1586	chrNC_030828.1	59332342	59345696	-	0	0	0	2	0	0
circRNA10567	1676	chrNC_030828.1	60520615	60532701	-	0	0	0	3	0	0
circRNA10568	1513	chrNC_030828.1	60696311	60718812	+	0	0	0	2	0	0
circRNA10569	165	chrNC_030828.1	60996150	60996314	+	0	0	0	1	0	0
circRNA1057	690	chrNC_030808.1	78447034	78447723	-	5	3	0	3	5	0
circRNA10570	330	chrNC_030828.1	63757016	63757652	-	0	0	0	1	0	0
circRNA10571	848	chrNC_030828.1	64547733	64548580	+	0	0	0	1	1	0
circRNA10572	1388	chrNC_030828.1	65938125	66061842	+	0	0	0	1	0	0
circRNA10573	334	chrNC_030828.1	66161195	66161608	+	0	0	0	2	0	0
circRNA10574	806	chrNC_030828.1	66170375	66172195	+	0	0	0	2	0	0
circRNA10575	183	chrNC_030828.1	66290316	66290498	+	0	0	0	4	0	0
circRNA10576	550	chrNC_030828.1	66425388	66444323	+	0	0	0	2	0	0
circRNA10577	4835	chrNC_030828.1	66888517	66947921	-	0	0	0	1	0	0
circRNA10578	361	chrNC_030828.1	67329005	67377416	+	0	0	0	1	0	0
circRNA10579	2663	chrNC_030828.1	67545652	67574880	+	0	0	0	1	0	0
circRNA1058	296	chrNC_030808.1	78659582	78667846	-	1	3	0	0	0	5
circRNA10580	615	chrNC_030828.1	67616112	67621880	-	0	0	0	2	0	0
circRNA10581	600	chrNW_017189530.1	317209	327307	+	0	0	0	1	0	0
circRNA10582	1326	chrNC_030820.1	6878174	7029087	-	0	0	0	1	0	0
circRNA10583	592	chrNC_030820.1	6923000	6996814	-	0	0	0	1	0	0
circRNA10584	373	chrNC_030820.1	6923013	6974971	-	0	0	0	7	0	0
circRNA10585	2761	chrNC_030820.1	9984704	10130277	-	0	0	0	1	0	0
circRNA10586	758	chrNC_030820.1	10698274	10699341	+	0	0	0	1	2	1
circRNA10587	1536	chrNC_030820.1	15326166	15482097	+	0	0	0	1	0	0
circRNA10588	423	chrNC_030820.1	15417629	15440106	+	0	0	0	1	0	0
circRNA10589	220	chrNC_030820.1	15825930	15827563	+	0	0	0	1	0	0
circRNA1059	265	chrNC_030808.1	78659582	78720029	-	2	1	0	0	0	0
circRNA10590	1893	chrNC_030820.1	16077820	16097379	+	0	0	0	1	0	0
circRNA10591	684	chrNC_030820.1	16090927	16094393	+	0	0	0	1	1	0
circRNA10592	359	chrNC_030820.1	16127196	16127869	+	0	0	0	1	0	0
circRNA10593	294	chrNC_030820.1	16167571	16175964	+	0	0	0	2	0	0
circRNA10594	882	chrNC_030820.1	16908549	16916583	-	0	0	0	2	0	0
circRNA10595	289	chrNC_030820.1	17021806	17022255	-	0	0	0	5	0	3
circRNA10596	712	chrNC_030820.1	17209222	17221935	+	0	0	0	5	0	0
circRNA10597	425	chrNC_030820.1	17421587	17447527	-	0	0	0	2	0	0
circRNA10598	271	chrNC_030820.1	17575371	17594545	-	0	0	0	1	0	0
circRNA10599	249	chrNC_030820.1	18357384	18369481	+	0	0	0	2	0	0
circRNA106	363	chrNC_030829.1	56136562	56137256	+	4	3	8	6	14	12
circRNA1060	871	chrNC_030808.1	80143733	80146608	-	1	0	0	0	0	0
circRNA10600	2164	chrNC_030820.1	19326903	19343693	+	0	0	0	2	0	0
circRNA10601	1617	chrNC_030820.1	19334994	19343693	+	0	0	0	1	0	0
circRNA10602	737	chrNC_030820.1	20917460	21033087	+	0	0	0	1	0	0
circRNA10603	284	chrNC_030820.1	24444528	24444811	+	0	0	0	8	2	0
circRNA10604	214	chrNC_030820.1	27198883	27202125	+	0	0	0	1	1	0
circRNA10605	609	chrNC_030820.1	29030701	29038970	-	0	0	0	1	0	0
circRNA10606	1084	chrNC_030820.1	29442574	29483445	-	0	0	0	2	0	0
circRNA10607	317	chrNC_030820.1	30555339	30558497	-	0	0	0	4	0	0
circRNA10608	2191	chrNC_030820.1	30693622	30715150	-	0	0	0	1	0	0
circRNA10609	996	chrNC_030820.1	30920578	30948449	-	0	0	0	3	0	0
circRNA1061	339	chrNC_030808.1	82027832	82032296	-	1	0	0	0	0	5
circRNA10610	202	chrNC_030820.1	32367985	32373487	-	0	0	0	2	0	0
circRNA10611	663	chrNC_030820.1	32684973	32687781	+	0	0	0	1	0	0
circRNA10612	526	chrNC_030820.1	36081462	36098605	+	0	0	0	1	0	0
circRNA10613	233	chrNC_030820.1	37673100	37674157	-	0	0	0	1	0	0
circRNA10614	306	chrNC_030820.1	38926292	38926597	+	0	0	0	1	0	0
circRNA10615	867	chrNC_030820.1	38994245	39037970	+	0	0	0	1	0	0
circRNA10616	423	chrNC_030820.1	39000793	39007388	+	0	0	0	3	0	0
circRNA10617	188	chrNC_030820.1	39378660	39379896	-	0	0	0	1	0	0
circRNA10618	571	chrNC_030820.1	44496052	44500822	+	0	0	0	2	0	0
circRNA10619	830	chrNC_030820.1	44503411	44507784	+	0	0	0	1	0	0
circRNA1062	1193	chrNC_030808.1	82027832	82057498	-	1	0	0	0	0	0
circRNA10620	477	chrNC_030820.1	46091970	46115588	+	0	0	0	3	0	0
circRNA10621	447	chrNC_030820.1	46104637	46118693	+	0	0	0	1	0	0
circRNA10622	1252	chrNC_030820.1	46137422	46163517	+	0	0	0	1	1	0
circRNA10623	939	chrNC_030820.1	46191209	46213791	+	0	0	0	2	0	0
circRNA10624	374	chrNC_030820.1	46683815	46705896	-	0	0	0	2	0	4
circRNA10625	1301	chrNC_030820.1	47226279	47263629	-	0	0	0	1	0	0
circRNA10626	676	chrNC_030820.1	47239801	47247007	-	0	0	0	2	1	4
circRNA10627	572	chrNC_030820.1	47804590	47821210	-	0	0	0	1	0	0
circRNA10628	1005	chrNC_030820.1	50697216	50702036	-	0	0	0	1	0	1
circRNA10629	672	chrNC_030820.1	50983557	50988579	-	0	0	0	1	0	0
circRNA1063	1351	chrNC_030808.1	82688403	82692850	-	2	0	1	2	0	0
circRNA10630	607	chrNC_030820.1	51162380	51195061	+	0	0	0	1	0	0
circRNA10631	182	chrNC_030820.1	51300336	51300834	+	0	0	0	2	0	0
circRNA10632	340	chrNC_030820.1	51870534	51870954	-	0	0	0	1	0	0
circRNA10633	765	chrNC_030820.1	52546547	52549643	-	0	0	0	2	0	0
circRNA10634	1122	chrNC_030820.1	52546547	52555603	-	0	0	0	4	0	0
circRNA10635	207	chrNC_030820.1	54208485	54210433	-	0	0	0	2	0	0
circRNA10636	252	chrNC_030820.1	54376585	54377490	+	0	0	0	1	0	0
circRNA10637	267	chrNC_030820.1	59903845	59906268	+	0	0	0	1	0	0
circRNA10638	656	chrNC_030820.1	60623262	60632387	+	0	0	0	3	0	0
circRNA10639	776	chrNC_030820.1	60636068	60645856	+	0	0	0	1	0	0
circRNA1064	317	chrNC_030808.1	82964030	82967563	+	44	51	51	64	71	93
circRNA10640	386	chrNC_030820.1	62642003	62645067	+	0	0	0	2	3	0
circRNA10641	400	chrNC_030820.1	62785490	62791008	+	0	0	0	3	0	0
circRNA10642	858	chrNC_030820.1	63045948	63051000	+	0	0	0	1	0	0
circRNA10643	1161	chrNC_030820.1	63395268	63419909	+	0	0	0	1	0	1
circRNA10644	262	chrNC_030820.1	63445564	63449860	+	0	0	0	1	0	0
circRNA10645	230	chrNC_030820.1	64938974	64939203	+	0	0	0	1	0	0
circRNA10646	495	chrNC_030820.1	65330502	65337799	-	0	0	0	4	2	0
circRNA10647	168	chrNC_030820.1	65420059	65420226	-	0	0	0	1	0	0
circRNA10648	968	chrNC_030820.1	65586253	65604982	-	0	0	0	1	0	0
circRNA10649	439	chrNC_030820.1	65873463	65888219	+	0	0	0	5	0	0
circRNA1065	671	chrNC_030808.1	83073653	83082442	-	5	6	0	3	2	3
circRNA10650	467	chrNC_030820.1	66242646	66257240	+	0	0	0	1	0	0
circRNA10651	240	chrNC_030820.1	66498410	66500187	+	0	0	0	1	0	0
circRNA10652	256	chrNC_030820.1	67374360	67375514	+	0	0	0	2	0	0
circRNA10653	431	chrNC_030820.1	75358624	75366198	-	0	0	0	1	0	0
circRNA10654	487	chrNC_030820.1	76670056	76672963	+	0	0	0	4	0	0
circRNA10655	745	chrNC_030820.1	76697118	76705358	+	0	0	0	1	0	0
circRNA10656	1174	chrNC_030820.1	76749077	76758803	+	0	0	0	3	4	0
circRNA10657	561	chrNC_030820.1	76787325	76802458	-	0	0	0	1	3	2
circRNA10658	237	chrNC_030820.1	77690607	77692014	-	0	0	0	1	0	0
circRNA10659	517	chrNC_030820.1	78370886	78383919	-	0	0	0	1	0	0
circRNA1066	199	chrNC_030808.1	83390455	83404643	+	1	0	0	0	0	0
circRNA10660	368	chrNC_030820.1	79035007	79044755	-	0	0	0	2	0	0
circRNA10661	315	chrNC_030820.1	79379334	79383629	-	0	0	0	2	4	0
circRNA10662	304	chrNC_030818.1	30907	37503	-	0	0	0	2	0	4
circRNA10663	203	chrNC_030818.1	309327	314543	-	0	0	0	3	0	0
circRNA10664	545	chrNC_030818.1	442129	448597	+	0	0	0	1	1	2
circRNA10665	505	chrNC_030818.1	1084941	1114312	-	0	0	0	1	3	0
circRNA10666	395	chrNC_030818.1	1113918	1114312	-	0	0	0	1	0	0
circRNA10667	877	chrNC_030818.1	2890870	2895243	-	0	0	0	3	0	0
circRNA10668	885	chrNC_030818.1	3045152	3053645	-	0	0	0	1	0	0
circRNA10669	2233	chrNC_030818.1	4402918	4432669	+	0	0	0	1	0	0
circRNA1067	504	chrNC_030808.1	83692744	83697297	+	2	0	1	0	0	0
circRNA10670	566	chrNC_030818.1	5861146	5873459	+	0	0	0	1	0	0
circRNA10671	699	chrNC_030818.1	6108499	6119313	-	0	0	0	1	0	0
circRNA10672	769	chrNC_030818.1	6497607	6508570	+	0	0	0	1	0	2
circRNA10673	1456	chrNC_030818.1	6531121	6547359	+	0	0	0	1	0	0
circRNA10674	505	chrNC_030818.1	6820062	6830591	+	0	0	0	1	0	0
circRNA10675	3825	chrNC_030818.1	10788914	10837357	-	0	0	0	1	2	0
circRNA10676	1285	chrNC_030818.1	13040140	13042009	-	0	0	0	2	0	0
circRNA10677	438	chrNC_030818.1	13052628	13056605	-	0	0	0	1	0	0
circRNA10678	233	chrNC_030818.1	13585553	13586210	+	0	0	0	5	1	0
circRNA10679	853	chrNC_030818.1	14881907	14886584	+	0	0	0	1	0	0
circRNA1068	810	chrNC_030808.1	85768859	85782421	-	1	0	0	0	0	0
circRNA10680	978	chrNC_030818.1	15112304	15210076	+	0	0	0	1	0	0
circRNA10681	351	chrNC_030818.1	15130048	15158331	+	0	0	0	2	0	0
circRNA10682	1602	chrNC_030818.1	15626959	15684645	+	0	0	0	1	0	0
circRNA10683	438	chrNC_030818.1	18840697	18846580	+	0	0	0	6	0	0
circRNA10684	1134	chrNC_030818.1	19188507	19212299	-	0	0	0	1	0	0
circRNA10685	456	chrNC_030818.1	19664488	19670969	+	0	0	0	1	0	0
circRNA10686	493	chrNC_030818.1	20241941	20254760	+	0	0	0	3	7	0
circRNA10687	613	chrNC_030818.1	20776288	20784100	-	0	0	0	1	0	0
circRNA10688	512	chrNC_030818.1	21011784	21019316	-	0	0	0	1	0	0
circRNA10689	861	chrNC_030818.1	21211631	21223463	-	0	0	0	3	0	0
circRNA1069	449	chrNC_030808.1	87062576	87070581	-	1	0	0	0	1	0
circRNA10690	983	chrNC_030818.1	21353527	21386749	-	0	0	0	4	0	0
circRNA10691	259	chrNC_030818.1	21675016	21680474	+	0	0	0	1	1	0
circRNA10692	353	chrNC_030818.1	22337159	22354718	-	0	0	0	1	0	2
circRNA10693	706	chrNC_030818.1	24556219	24577032	+	0	0	0	2	0	0
circRNA10694	551	chrNC_030818.1	24569168	24577032	+	0	0	0	1	0	0
circRNA10695	1487	chrNC_030818.1	24569168	24605984	+	0	0	0	5	0	1
circRNA10696	2043	chrNC_030818.1	25545295	25695944	-	0	0	0	1	0	0
circRNA10697	1162	chrNC_030818.1	25628130	25677402	-	0	0	0	1	0	2
circRNA10698	480	chrNC_030818.1	25640249	25661509	-	0	0	0	3	0	1
circRNA10699	2741	chrNC_030818.1	25683767	25718777	-	0	0	0	1	0	0
circRNA107	1034	chrNC_030829.1	56288436	56289884	+	1	0	1	0	0	0
circRNA1070	739	chrNC_030808.1	87344828	87366048	+	1	2	0	0	1	0
circRNA10700	402	chrNC_030818.1	25817036	25822078	+	0	0	0	2	0	0
circRNA10701	363	chrNC_030818.1	25850492	25852650	+	0	0	0	1	0	0
circRNA10702	1782	chrNC_030818.1	27501829	27621569	-	0	0	0	1	0	0
circRNA10703	370	chrNC_030818.1	27578902	27586229	-	0	0	0	3	0	0
circRNA10704	302	chrNC_030818.1	28403785	28404604	+	0	0	0	3	0	0
circRNA10705	436	chrNC_030818.1	29081210	29090497	+	0	0	0	2	0	0
circRNA10706	865	chrNC_030818.1	29377416	29385543	+	0	0	0	1	0	0
circRNA10707	626	chrNC_030818.1	30352287	30361390	+	0	0	0	2	0	0
circRNA10708	2194	chrNC_030818.1	37650137	37670986	-	0	0	0	1	0	0
circRNA10709	255	chrNC_030818.1	37838028	37843790	+	0	0	0	2	0	0
circRNA1071	726	chrNC_030808.1	87553970	87559647	-	1	0	0	0	1	0
circRNA10710	802	chrNC_030818.1	40330741	40404235	+	0	0	0	2	0	0
circRNA10711	287	chrNC_030818.1	40360990	40363166	+	0	0	0	3	0	0
circRNA10712	401	chrNC_030818.1	43543539	43563053	+	0	0	0	4	0	0
circRNA10713	379	chrNC_030818.1	47769736	47785615	-	0	0	0	1	0	3
circRNA10714	1099	chrNC_030818.1	48011291	48020942	-	0	0	0	2	0	0
circRNA10715	332	chrNC_030818.1	48888265	48895755	-	0	0	0	1	0	0
circRNA10716	560	chrNC_030818.1	49456269	49462086	-	0	0	0	7	0	0
circRNA10717	147	chrNC_030818.1	59592826	59594709	-	0	0	0	2	0	0
circRNA10718	420	chrNC_030818.1	59636838	59639345	-	0	0	0	5	0	2
circRNA10719	997	chrNC_030818.1	59658600	59681641	-	0	0	0	1	0	0
circRNA1072	1615	chrNC_030808.1	87553970	87564102	-	6	12	8	2	8	5
circRNA10720	1047	chrNC_030818.1	61123615	61131552	+	0	0	0	2	0	0
circRNA10721	751	chrNC_030818.1	61159882	61177512	+	0	0	0	4	10	3
circRNA10722	299	chrNC_030818.1	61739786	61742305	+	0	0	0	1	0	0
circRNA10723	1758	chrNC_030818.1	62104895	62143359	-	0	0	0	5	0	0
circRNA10724	230	chrNC_030818.1	67599170	67599399	-	0	0	0	2	1	0
circRNA10725	1104	chrNC_030818.1	67918941	67955714	+	0	0	0	1	0	0
circRNA10726	883	chrNC_030818.1	67921433	67955714	+	0	0	0	1	1	0
circRNA10727	264	chrNC_030818.1	69046315	69050822	-	0	0	0	6	0	0
circRNA10728	827	chrNC_030818.1	70719294	70731614	-	0	0	0	3	3	0
circRNA10729	270	chrNC_030818.1	71414821	71430454	-	0	0	0	1	0	0
circRNA1073	332	chrNC_030808.1	87558643	87559647	-	1	2	0	0	1	0
circRNA10730	393	chrNC_030818.1	71735625	71738464	-	0	0	0	2	0	1
circRNA10731	1732	chrNC_030818.1	73319530	73348929	+	0	0	0	1	0	0
circRNA10732	966	chrNC_030818.1	74221904	74251724	-	0	0	0	4	2	0
circRNA10733	273	chrNC_030818.1	74244795	74251724	-	0	0	0	1	0	0
circRNA10734	624	chrNC_030818.1	74585646	74589822	+	0	0	0	1	0	0
circRNA10735	761	chrNC_030818.1	74799462	74814563	+	0	0	0	4	0	0
circRNA10736	821	chrNC_030818.1	74845237	74870110	+	0	0	0	1	2	3
circRNA10737	537	chrNC_030818.1	82481230	82510909	+	0	0	0	1	0	0
circRNA10738	4825	chrNC_030818.1	82571995	82797415	+	0	0	0	3	0	0
circRNA10739	406	chrNC_030818.1	82676118	82680067	+	0	0	0	1	2	0
circRNA1074	294	chrNC_030808.1	94281654	94283249	-	1	0	1	1	2	0
circRNA10740	1405	chrNC_030818.1	82705343	82770802	+	0	0	0	2	0	0
circRNA10741	586	chrNC_030818.1	82717260	82718984	+	0	0	0	2	0	1
circRNA10742	183	chrNC_030818.1	86128727	86130875	+	0	0	0	1	0	0
circRNA10743	376	chrNC_030818.1	86588030	86593350	+	0	0	0	1	0	0
circRNA10744	395	chrNC_030818.1	86812373	86812767	-	0	0	0	3	0	3
circRNA10745	603	chrNC_030818.1	87591301	87598209	-	0	0	0	2	0	0
circRNA10746	417	chrNC_030818.1	87600884	87605021	-	0	0	0	2	0	0
circRNA10747	1796	chrNC_030818.1	88134968	88162826	+	0	0	0	2	0	0
circRNA10748	605	chrNC_030818.1	95082749	95091541	-	0	0	0	4	0	0
circRNA10749	1059	chrNC_030818.1	95082749	95109434	-	0	0	0	2	0	0
circRNA1075	2049	chrNC_030808.1	94696383	94750149	-	1	0	0	0	0	0
circRNA10750	594	chrNC_030818.1	95558535	95570814	-	0	0	0	1	0	0
circRNA10751	287	chrNC_030818.1	95876818	95891076	-	0	0	0	1	0	0
circRNA10752	812	chrNC_030818.1	98160822	98166153	-	0	0	0	1	0	0
circRNA10753	267	chrNC_030818.1	98674571	98674942	+	0	0	0	1	0	0
circRNA10754	546	chrNC_030818.1	98691367	98692168	+	0	0	0	1	0	0
circRNA10755	372	chrNC_030818.1	98814292	98815537	+	0	0	0	2	0	0
circRNA10756	1344	chrNC_030818.1	100565316	100590389	+	0	0	0	1	0	0
circRNA10757	593	chrNC_030818.1	100586785	100592540	+	0	0	0	2	0	0
circRNA10758	668	chrNC_030818.1	101030929	101041143	+	0	0	0	1	0	1
circRNA10759	1175	chrNC_030818.1	101030929	101044388	+	0	0	0	5	1	1
circRNA1076	662	chrNC_030808.1	94734017	94740181	-	2	0	2	0	0	0
circRNA10760	543	chrNC_030818.1	101819569	101826146	-	0	0	0	1	0	0
circRNA10761	1239	chrNC_030818.1	102382853	102388245	-	0	0	0	2	0	1
circRNA10762	523	chrNW_017189516.1	702571	708454	+	0	0	0	1	0	0
circRNA10763	434	chrNW_017189516.1	2852568	2885356	-	0	0	0	2	0	1
circRNA10764	1815	chrNW_017189516.1	2885184	2939556	-	0	0	0	5	1	0
circRNA10765	381	chrNW_017189516.1	2949016	2963720	-	0	0	0	1	3	0
circRNA10766	3998	chrNW_017189516.1	2949016	3004438	-	0	0	0	1	0	1
circRNA10767	546	chrNW_017189516.1	11291802	11296173	-	0	0	0	1	0	0
circRNA10768	444	chrNW_017189516.1	16069548	16074834	-	0	0	0	1	0	0
circRNA10769	240	chrNW_017189516.1	22758209	22769007	+	0	0	0	3	0	0
circRNA1077	823	chrNC_030808.1	94830292	94964400	-	1	0	0	0	0	0
circRNA10770	699	chrNW_017189516.1	23170156	23173000	-	0	0	0	2	0	0
circRNA10771	2565	chrNW_017189516.1	23196637	23221588	-	0	0	0	4	0	0
circRNA10772	1918	chrNW_017189516.1	27042833	27177777	+	0	0	0	1	0	0
circRNA10773	1481	chrNW_017189516.1	45282355	45372103	-	0	0	0	2	0	0
circRNA10774	262	chrNW_017189516.1	46278884	46285388	+	0	0	0	1	4	0
circRNA10775	821	chrNW_017189516.1	51262773	51300752	-	0	0	0	1	0	0
circRNA10776	398	chrNW_017189516.1	53206086	53251177	-	0	0	0	1	0	0
circRNA10777	424	chrNW_017189516.1	53610790	53617639	-	0	0	0	1	0	0
circRNA10778	426	chrNW_017189516.1	54448016	54454895	+	0	0	0	1	0	0
circRNA10779	372	chrNW_017189516.1	54479042	54484579	-	0	0	0	2	0	0
circRNA1078	860	chrNC_030808.1	95346081	95366679	+	1	0	0	0	0	0
circRNA10780	292	chrNW_017189516.1	54834154	54856133	+	0	0	0	1	0	0
circRNA10781	812	chrNW_017189516.1	59537024	59583287	+	0	0	0	1	0	0
circRNA10782	421	chrNW_017189516.1	59643839	59659364	+	0	0	0	1	0	1
circRNA10783	153	chrNW_017189516.1	60591912	60592064	+	0	0	0	2	0	0
circRNA10784	521	chrNW_017189516.1	65374405	65375795	+	0	0	0	1	0	0
circRNA10785	117	chrNW_017189516.1	65582385	65582851	-	0	0	0	1	0	0
circRNA10786	602	chrNC_030814.1	1702011	1716948	-	0	0	0	1	0	2
circRNA10787	1225	chrNC_030814.1	1702011	1740894	-	0	0	0	1	0	4
circRNA10788	1030	chrNC_030814.1	1711233	1740894	-	0	0	0	1	0	0
circRNA10789	757	chrNC_030814.1	1716815	1740894	-	0	0	0	2	0	0
circRNA1079	314	chrNC_030808.1	95398257	95418102	+	1	0	0	3	0	0
circRNA10790	2031	chrNC_030814.1	1735346	1819724	-	0	0	0	1	1	0
circRNA10791	1236	chrNC_030814.1	1769240	1802974	-	0	0	0	1	0	0
circRNA10792	237	chrNC_030814.1	2236867	2237491	+	0	0	0	1	0	0
circRNA10793	542	chrNC_030814.1	2747654	2776475	-	0	0	0	4	0	0
circRNA10794	972	chrNC_030814.1	3207819	3685847	+	0	0	0	1	0	0
circRNA10795	1403	chrNC_030814.1	8491577	8508272	-	0	0	0	1	0	0
circRNA10796	1003	chrNC_030814.1	12513295	12518573	+	0	0	0	2	4	1
circRNA10797	807	chrNC_030814.1	15354125	15360814	+	0	0	0	1	0	4
circRNA10798	264	chrNC_030814.1	15473403	15481032	-	0	0	0	1	0	0
circRNA10799	1228	chrNC_030814.1	15483801	15522034	-	0	0	0	2	0	0
circRNA108	942	chrNC_030829.1	56535707	56541943	-	4	3	1	1	7	3
circRNA1080	613	chrNC_030808.1	95398257	95447367	+	2	0	0	0	1	0
circRNA10800	1159	chrNC_030814.1	15492722	15527105	-	0	0	0	1	0	0
circRNA10801	1416	chrNC_030814.1	15738724	15771397	+	0	0	0	4	0	0
circRNA10802	431	chrNC_030814.1	16589759	16591458	-	0	0	0	1	0	0
circRNA10803	327	chrNC_030814.1	17098149	17113658	+	0	0	0	1	2	2
circRNA10804	309	chrNC_030814.1	20481558	20493579	-	0	0	0	5	0	0
circRNA10805	643	chrNC_030814.1	23518579	23535337	+	0	0	0	1	0	0
circRNA10806	156	chrNC_030814.1	26709585	26709740	+	0	0	0	1	0	0
circRNA10807	220	chrNC_030814.1	28957765	28975337	+	0	0	0	9	0	0
circRNA10808	789	chrNC_030814.1	29297203	29305029	-	0	0	0	2	0	0
circRNA10809	884	chrNC_030814.1	29337012	29426977	-	0	0	0	2	0	0
circRNA1081	601	chrNC_030808.1	95928916	95947656	+	2	0	0	0	0	0
circRNA10810	857	chrNC_030814.1	29424184	29435313	-	0	0	0	2	0	2
circRNA10811	1315	chrNC_030814.1	29434090	29465046	-	0	0	0	1	0	0
circRNA10812	572	chrNC_030814.1	29471574	29484155	-	0	0	0	1	0	0
circRNA10813	2887	chrNC_030814.1	29637204	29813952	-	0	0	0	2	0	0
circRNA10814	1482	chrNC_030814.1	29683302	29794597	-	0	0	0	3	0	0
circRNA10815	357	chrNC_030814.1	29714382	29715632	-	0	0	0	3	0	0
circRNA10816	590	chrNC_030814.1	29756014	29794597	-	0	0	0	2	0	0
circRNA10817	2473	chrNC_030814.1	29980403	29985327	-	0	0	0	1	0	0
circRNA10818	624	chrNC_030814.1	35434952	35436431	-	0	0	0	1	0	0
circRNA10819	280	chrNC_030814.1	44242110	44248585	-	0	0	0	3	0	0
circRNA1082	1339	chrNC_030808.1	96638154	96660447	-	1	0	0	0	0	0
circRNA10820	1025	chrNC_030814.1	45052706	45065452	+	0	0	0	1	1	3
circRNA10821	745	chrNC_030814.1	47405937	47413898	-	0	0	0	8	0	0
circRNA10822	265	chrNC_030814.1	47948251	47954366	+	0	0	0	2	0	0
circRNA10823	495	chrNC_030814.1	48572429	48572923	-	0	0	0	1	0	0
circRNA10824	1467	chrNC_030814.1	49041576	49074497	-	0	0	0	2	0	0
circRNA10825	953	chrNC_030814.1	49065049	49077341	-	0	0	0	1	0	1
circRNA10826	771	chrNC_030814.1	53075590	53082602	+	0	0	0	1	0	0
circRNA10827	248	chrNC_030814.1	53100858	53105065	+	0	0	0	1	0	0
circRNA10828	297	chrNC_030814.1	53180275	53180571	-	0	0	0	2	0	0
circRNA10829	443	chrNC_030814.1	56568673	56587652	-	0	0	0	3	0	0
circRNA1083	505	chrNC_030808.1	96760493	96769741	+	4	8	3	1	6	4
circRNA10830	283	chrNC_030814.1	59806280	59809096	+	0	0	0	2	0	0
circRNA10831	256	chrNC_030814.1	60582766	60583996	+	0	0	0	1	3	4
circRNA10832	516	chrNC_030814.1	60696630	60699424	-	0	0	0	1	0	0
circRNA10833	288	chrNC_030814.1	60808520	60808807	+	0	0	0	1	0	0
circRNA10834	219	chrNC_030814.1	60895776	60895994	+	0	0	0	1	0	0
circRNA10835	572	chrNC_030814.1	61028681	61031367	+	0	0	0	1	3	1
circRNA10836	1203	chrNC_030814.1	61028681	61044597	+	0	0	0	1	0	4
circRNA10837	395	chrNC_030814.1	61066504	61077768	+	0	0	0	1	0	0
circRNA10838	543	chrNC_030814.1	64299985	64303182	-	0	0	0	1	0	0
circRNA10839	1533	chrNC_030814.1	64299985	64316964	-	0	0	0	3	0	0
circRNA1084	1684	chrNC_030808.1	96769495	96791185	+	2	0	0	0	0	0
circRNA10840	572	chrNC_030814.1	64307309	64314797	-	0	0	0	1	0	0
circRNA10841	922	chrNC_030814.1	65963072	65966550	+	0	0	0	2	0	0
circRNA10842	282	chrNC_030814.1	67109222	67109579	-	0	0	0	1	0	0
circRNA10843	555	chrNC_030814.1	67475094	67478749	+	0	0	0	1	0	0
circRNA10844	263	chrNC_030814.1	71895502	71896709	-	0	0	0	2	0	1
circRNA10845	3723	chrNC_030814.1	71895502	71933220	-	0	0	0	1	0	0
circRNA10846	406	chrNC_030814.1	72180208	72199322	+	0	0	0	1	0	10
circRNA10847	851	chrNC_030814.1	80250373	80257863	-	0	0	0	1	1	0
circRNA10848	413	chrNC_030814.1	80495318	80507825	+	0	0	0	1	0	0
circRNA10849	1360	chrNC_030814.1	83511054	83536246	+	0	0	0	5	0	0
circRNA1085	694	chrNC_030808.1	96920123	96937762	-	1	0	0	3	0	2
circRNA10850	1182	chrNC_030814.1	88775190	88790681	+	0	0	0	1	0	2
circRNA10851	294	chrNC_030814.1	91926538	91927027	-	0	0	0	1	0	0
circRNA10852	591	chrNC_030814.1	91947932	91951527	+	0	0	0	3	0	3
circRNA10853	632	chrNC_030814.1	92050348	92056170	-	0	0	0	1	0	0
circRNA10854	1962	chrNC_030814.1	93327929	93355526	-	0	0	0	3	0	0
circRNA10855	1606	chrNC_030814.1	94853441	94865735	+	0	0	0	2	0	0
circRNA10856	293	chrNC_030814.1	95711506	95711882	-	0	0	0	1	0	0
circRNA10857	368	chrNC_030814.1	96222227	96225000	-	0	0	0	1	0	0
circRNA10858	1246	chrNC_030814.1	100927096	100935854	-	0	0	0	2	0	0
circRNA10859	677	chrNC_030814.1	102565546	102581008	+	0	0	0	1	0	1
circRNA1086	1750	chrNC_030808.1	97808003	97817924	+	1	0	0	0	0	0
circRNA10860	406	chrNC_030814.1	107514181	107565081	-	0	0	0	4	4	0
circRNA10861	320	chrNC_030830.1	319217	322021	-	0	0	0	1	0	0
circRNA10862	206	chrNC_030830.1	3196798	3198281	-	0	0	0	1	0	0
circRNA10863	1275	chrNC_030830.1	8844216	8849644	+	0	0	0	4	0	0
circRNA10864	2071	chrNC_030830.1	9544369	9546439	-	0	0	0	2	0	0
circRNA10865	254	chrNC_030830.1	9775618	9832495	-	0	0	0	1	0	0
circRNA10866	1086	chrNC_030830.1	10565335	10568060	-	0	0	0	1	0	0
circRNA10867	302	chrNC_030830.1	10663289	10663852	-	0	0	0	1	0	0
circRNA10868	362	chrNC_030830.1	10720408	10724421	-	0	0	0	2	0	0
circRNA10869	791	chrNC_030830.1	10942163	10954639	+	0	0	0	1	0	0
circRNA1087	326	chrNC_030808.1	98907383	98911332	+	1	0	0	2	0	0
circRNA10870	347	chrNC_030830.1	15055925	15057673	+	0	0	0	1	0	0
circRNA10871	210	chrNC_030830.1	15441862	15442548	-	0	0	0	2	0	0
circRNA10872	960	chrNC_030830.1	21489234	21493076	-	0	0	0	1	0	0
circRNA10873	253	chrNC_030830.1	22313637	22313889	-	0	0	0	3	0	0
circRNA10874	1522	chrNC_030830.1	32473158	32486677	-	0	0	0	1	0	0
circRNA10875	782	chrNC_030830.1	37448338	37466777	-	0	0	0	1	0	0
circRNA10876	688	chrNC_030830.1	37597877	37602996	-	0	0	0	1	0	0
circRNA10877	1634	chrNC_030830.1	38600397	38605363	-	0	0	0	1	0	0
circRNA10878	572	chrNC_030830.1	44996053	44997470	-	0	0	0	1	0	0
circRNA10879	726	chrNC_030830.1	45056794	45061728	-	0	0	0	1	0	0
circRNA1088	442	chrNC_030808.1	105732619	105741139	-	11	13	10	13	17	18
circRNA10880	267	chrNC_030830.1	45064971	45065237	-	0	0	0	1	0	0
circRNA10881	490	chrNC_030830.1	45155740	45225965	-	0	0	0	1	0	1
circRNA10882	232	chrNC_030830.1	45587160	45591726	+	0	0	0	3	4	2
circRNA10883	692	chrNC_030830.1	45591615	45609072	+	0	0	0	1	0	0
circRNA10884	266	chrNC_030832.1	1607740	1609725	+	0	0	0	1	0	0
circRNA10885	264	chrNC_030832.1	1959081	1959344	+	0	0	0	3	0	0
circRNA10886	343	chrNC_030832.1	3513883	3515419	+	0	0	0	2	0	0
circRNA10887	353	chrNC_030832.1	7421426	7423079	+	0	0	0	3	0	0
circRNA10888	281	chrNC_030832.1	7545630	7549029	+	0	0	0	2	0	0
circRNA10889	960	chrNC_030832.1	9537667	9570904	+	0	0	0	2	0	0
circRNA1089	742	chrNC_030808.1	106485860	106496371	+	1	0	0	0	1	0
circRNA10890	1137	chrNC_030832.1	9537667	9591384	+	0	0	0	2	0	0
circRNA10891	415	chrNC_030832.1	9570673	9591384	+	0	0	0	1	0	0
circRNA10892	1332	chrNC_030832.1	9586961	9684257	+	0	0	0	1	0	1
circRNA10893	228	chrNC_030832.1	10459596	10459823	-	0	0	0	1	0	0
circRNA10894	585	chrNC_030832.1	12695275	12708598	+	0	0	0	5	0	0
circRNA10895	530	chrNC_030832.1	13386031	13400369	-	0	0	0	3	0	0
circRNA10896	797	chrNC_030832.1	13573100	13582723	+	0	0	0	4	0	0
circRNA10897	571	chrNC_030832.1	14265179	14268136	+	0	0	0	2	0	1
circRNA10898	457	chrNC_030832.1	16287851	16291553	-	0	0	0	1	0	0
circRNA10899	500	chrNC_030832.1	17048723	17060996	+	0	0	0	2	0	0
circRNA109	831	chrNC_030829.1	56538318	56541943	-	1	1	0	0	0	0
circRNA1090	371	chrNC_030808.1	106609462	106610289	-	2	0	2	3	0	3
circRNA10900	1338	chrNC_030832.1	17060327	17123272	+	0	0	0	2	0	0
circRNA10901	306	chrNC_030832.1	17123133	17130616	+	0	0	0	1	2	0
circRNA10902	402	chrNC_030832.1	19914870	19920776	+	0	0	0	4	0	0
circRNA10903	1491	chrNC_030832.1	21232076	21233566	-	0	0	0	2	0	0
circRNA10904	509	chrNC_030832.1	22350315	22377573	+	0	0	0	4	2	1
circRNA10905	287	chrNC_030832.1	22538434	22543142	-	0	0	0	1	0	0
circRNA10906	272	chrNC_030832.1	25558432	25561281	-	0	0	0	1	0	0
circRNA10907	963	chrNC_030832.1	25558432	25578759	-	0	0	0	2	0	0
circRNA10908	311	chrNC_030832.1	25595685	25596974	-	0	0	0	1	0	0
circRNA10909	324	chrNC_030832.1	26755254	26755665	+	0	0	0	2	0	0
circRNA1091	307	chrNC_030808.1	106625314	106628069	+	15	10	7	26	29	21
circRNA10910	244	chrNC_030832.1	27774783	27775026	+	0	0	0	3	0	0
circRNA10911	194	chrNC_030832.1	27865011	27866503	+	0	0	0	3	0	0
circRNA10912	243	chrNC_030832.1	32522381	32523741	+	0	0	0	2	3	4
circRNA10913	1054	chrNC_030832.1	32599974	32624611	-	0	0	0	1	0	0
circRNA10914	839	chrNC_030832.1	33509219	33515942	+	0	0	0	2	6	0
circRNA10915	166	chrNC_030832.1	33634492	33635754	-	0	0	0	1	0	0
circRNA10916	406	chrNC_030832.1	35742618	35752459	-	0	0	0	1	0	0
circRNA10917	458	chrNC_030832.1	38201346	38203728	-	0	0	0	6	0	0
circRNA10918	965	chrNC_030832.1	38882805	38891882	-	0	0	0	1	0	0
circRNA10919	1571	chrNC_030832.1	39484732	39508727	+	0	0	0	1	0	0
circRNA1092	518	chrNC_030808.1	106638989	106656660	+	1	5	8	4	5	6
circRNA10920	1315	chrNC_030832.1	39494782	39508727	+	0	0	0	3	0	0
circRNA10921	5580	chrNC_030832.1	39764112	39800581	+	0	0	0	1	0	0
circRNA10922	938	chrNC_030832.1	39795779	39806748	+	0	0	0	1	0	0
circRNA10923	309	chrNC_030832.1	41794582	41797728	+	0	0	0	3	0	0
circRNA10924	512	chrNC_030832.1	41794582	41800420	+	0	0	0	1	0	0
circRNA10925	2461	chrNC_030832.1	42458071	42487547	+	0	0	0	1	0	0
circRNA10926	993	chrNC_030834.1	7781999	7793337	+	0	0	0	4	0	0
circRNA10927	706	chrNC_030834.1	7958524	7967506	-	0	0	0	1	0	0
circRNA10928	1460	chrNC_030834.1	8253490	8322464	+	0	0	0	1	0	0
circRNA10929	1765	chrNC_030834.1	8308471	8341664	+	0	0	0	2	2	0
circRNA1093	698	chrNC_030808.1	106638989	106683713	+	2	6	0	5	0	0
circRNA10930	986	chrNC_030834.1	8322368	8341664	+	0	0	0	1	0	0
circRNA10931	165	chrNC_030834.1	9173641	9174988	-	0	0	0	3	0	0
circRNA10932	509	chrNC_030834.1	11542321	11561324	-	0	0	0	1	0	2
circRNA10933	228	chrNC_030834.1	11720283	11723966	-	0	0	0	1	0	0
circRNA10934	1567	chrNC_030834.1	12190275	12213863	+	0	0	0	1	0	0
circRNA10935	812	chrNC_030834.1	12259341	12271689	-	0	0	0	1	0	0
circRNA10936	1745	chrNC_030834.1	12259341	12280149	-	0	0	0	2	0	0
circRNA10937	3328	chrNC_030834.1	18386858	18465399	-	0	0	0	1	0	0
circRNA10938	553	chrNC_030834.1	18425373	18441849	-	0	0	0	1	0	0
circRNA10939	1519	chrNC_030834.1	18425373	18456581	-	0	0	0	2	0	0
circRNA1094	338	chrNC_030808.1	106650479	106656660	+	1	3	0	1	0	2
circRNA10940	373	chrNC_030834.1	18782004	18794070	+	0	0	0	1	0	0
circRNA10941	1376	chrNC_030834.1	19986500	20010282	-	0	0	0	1	0	0
circRNA10942	396	chrNC_030834.1	25402641	25421581	+	0	0	0	2	0	0
circRNA10943	305	chrNC_030834.1	26281307	26281959	+	0	0	0	3	1	0
circRNA10944	577	chrNC_030834.1	29991351	29997988	-	0	0	0	2	0	0
circRNA10945	1179	chrNC_030834.1	36919585	36935263	-	0	0	0	1	0	0
circRNA10946	221	chrNC_030834.1	37843104	37844003	-	0	0	0	2	0	0
circRNA10947	501	chrNC_030836.1	594855	596599	-	0	0	0	3	0	0
circRNA10948	221	chrNC_030836.1	7916178	7918987	-	0	0	0	2	0	3
circRNA10949	1895	chrNC_030836.1	8978539	9027534	+	0	0	0	3	0	0
circRNA1095	1660	chrNC_030808.1	106650479	106714713	+	3	0	6	0	0	1
circRNA10950	776	chrNC_030836.1	9219546	9234847	+	0	0	0	2	0	0
circRNA10951	436	chrNC_030836.1	11699670	11705991	+	0	0	0	1	0	0
circRNA10952	1499	chrNC_030836.1	11960596	11963262	-	0	0	0	1	0	0
circRNA10953	464	chrNC_030836.1	17552665	17564299	+	0	0	0	1	0	1
circRNA10954	2302	chrNC_030836.1	17742540	17756520	+	0	0	0	1	0	0
circRNA10955	356	chrNC_030836.1	18077511	18083215	+	0	0	0	1	0	0
circRNA10956	288	chrNC_030836.1	23902038	23929226	-	0	0	0	5	0	0
circRNA10957	507	chrNC_030836.1	25561758	25576646	+	0	0	0	1	0	0
circRNA10958	2280	chrNC_030836.1	25760605	25779810	+	0	0	0	1	0	0
circRNA10959	407	chrNC_030836.1	35407886	35412511	-	0	0	0	1	0	0
circRNA1096	1023	chrNC_030808.1	106694287	106714713	+	1	0	0	0	0	0
circRNA10960	1159	chrNC_030836.1	35647614	35661374	-	0	0	0	2	0	0
circRNA10961	672	chrNC_030836.1	40747343	40749905	-	0	0	0	1	0	0
circRNA10962	417	chrNC_030836.1	41262494	41263074	-	0	0	0	2	0	0
circRNA10963	372	chrNC_030836.1	42359657	42362569	-	0	0	0	2	0	0
circRNA10964	267	chrNC_030836.1	43724729	43725087	+	0	0	0	1	1	0
circRNA10965	864	chrNC_030836.1	44203008	44204792	-	0	0	0	1	0	0
circRNA10966	492	chrNC_030836.1	45550687	45553231	+	0	0	0	1	0	0
circRNA10967	225	chrNC_030836.1	45924720	45928361	+	0	0	0	2	0	0
circRNA10968	1415	chrNC_030836.1	46224822	46235624	+	0	0	0	2	0	0
circRNA10969	581	chrNC_030836.1	47220948	47226942	-	0	0	0	1	0	0
circRNA1097	416	chrNC_030808.1	107090112	107093978	-	1	1	2	0	4	3
circRNA10970	274	chrNC_030836.1	47231124	47233912	-	0	0	0	1	0	0
circRNA10971	240	chrNC_030836.1	48503536	48504424	+	0	0	0	1	0	0
circRNA10972	685	chrNC_030836.1	48542881	48547414	+	0	0	0	1	0	0
circRNA10973	427	chrNC_030836.1	51171968	51173581	+	0	0	0	1	0	0
circRNA10974	759	chrNW_017190073.1	256076	298570	-	0	0	0	7	0	0
circRNA10975	2786	chrNW_017189896.1	117730	145885	-	0	0	0	2	0	0
circRNA10976	753	chrNW_017189629.1	416839	471838	-	0	0	0	1	0	0
circRNA10977	716	chrNW_017189585.1	204773	217590	+	0	0	0	1	0	0
circRNA10978	218	chrNW_017212809.1	11461	11678	-	0	0	0	1	1	0
circRNA10979	993	chrNC_030817.1	348832	383746	-	0	0	0	1	0	4
circRNA1098	534	chrNC_030808.1	107090112	107095957	-	2	1	0	0	0	0
circRNA10980	344	chrNC_030817.1	1061692	1073332	+	0	0	0	2	0	1
circRNA10981	870	chrNC_030817.1	2833151	2852080	+	0	0	0	1	1	1
circRNA10982	411	chrNC_030817.1	10904381	10912699	+	0	0	0	1	0	0
circRNA10983	295	chrNC_030817.1	10965571	10970506	+	0	0	0	2	6	4
circRNA10984	441	chrNC_030817.1	10965571	10984388	+	0	0	0	2	3	2
circRNA10985	595	chrNC_030817.1	11040358	11077335	+	0	0	0	10	0	0
circRNA10986	1171	chrNC_030817.1	14330986	14360356	+	0	0	0	4	0	0
circRNA10987	672	chrNC_030817.1	14349896	14360356	+	0	0	0	1	0	0
circRNA10988	1630	chrNC_030817.1	16025623	16050967	-	0	0	0	2	0	0
circRNA10989	1404	chrNC_030817.1	17244167	17296264	+	0	0	0	1	0	0
circRNA1099	999	chrNC_030808.1	108438575	108456685	-	1	0	0	0	0	0
circRNA10990	264	chrNC_030817.1	17665899	17674448	-	0	0	0	2	0	1
circRNA10991	318	chrNC_030817.1	17770537	17772467	-	0	0	0	1	0	0
circRNA10992	2001	chrNC_030817.1	17968887	17972069	+	0	0	0	2	0	0
circRNA10993	348	chrNC_030817.1	18254916	18339363	+	0	0	0	6	0	0
circRNA10994	649	chrNC_030817.1	18439424	18457404	-	0	0	0	1	0	0
circRNA10995	882	chrNC_030817.1	18528544	18550647	-	0	0	0	3	0	0
circRNA10996	483	chrNC_030817.1	20401098	20407407	-	0	0	0	2	0	0
circRNA10997	765	chrNC_030817.1	20459567	20477331	-	0	0	0	2	0	0
circRNA10998	430	chrNC_030817.1	20467735	20478862	-	0	0	0	2	0	7
circRNA10999	839	chrNC_030817.1	20467735	20502930	-	0	0	0	1	0	0
circRNA11	478	chrNC_030829.1	6099244	6099721	-	2	0	2	0	1	4
circRNA110	328	chrNC_030829.1	57243401	57244491	-	1	0	0	0	0	0
circRNA1100	491	chrNC_030808.1	108454282	108456685	-	3	5	5	3	4	0
circRNA11000	1840	chrNC_030817.1	20502798	20515524	-	0	0	0	1	1	1
circRNA11001	337	chrNC_030817.1	21674229	21675551	-	0	0	0	3	0	0
circRNA11002	767	chrNC_030817.1	22113035	22134321	-	0	0	0	1	0	0
circRNA11003	281	chrNC_030817.1	22252120	22269773	+	0	0	0	1	0	0
circRNA11004	441	chrNC_030817.1	23420841	23433076	-	0	0	0	4	1	0
circRNA11005	279	chrNC_030817.1	25418568	25418962	-	0	0	0	3	0	0
circRNA11006	686	chrNC_030817.1	26541789	26557372	-	0	0	0	4	2	0
circRNA11007	2013	chrNC_030817.1	26810341	26828137	-	0	0	0	1	0	0
circRNA11008	654	chrNC_030817.1	26860726	26869751	-	0	0	0	5	0	1
circRNA11009	219	chrNC_030817.1	26869533	26869751	-	0	0	0	1	0	0
circRNA1101	322	chrNC_030808.1	108960150	108960763	-	9	9	14	9	4	13
circRNA11010	488	chrNC_030817.1	26894721	26898090	-	0	0	0	1	0	0
circRNA11011	2049	chrNC_030817.1	29298185	29317566	-	0	0	0	2	0	0
circRNA11012	632	chrNC_030817.1	32615648	32622467	-	0	0	0	1	0	0
circRNA11013	1852	chrNC_030817.1	32762029	32771216	+	0	0	0	1	0	0
circRNA11014	1269	chrNC_030817.1	33602628	33617524	+	0	0	0	4	0	1
circRNA11015	160	chrNC_030817.1	35162443	35162975	-	0	0	0	8	0	0
circRNA11016	782	chrNC_030817.1	37927858	37933279	-	0	0	0	1	0	0
circRNA11017	495	chrNC_030817.1	41261107	41273754	-	0	0	0	2	0	0
circRNA11018	606	chrNC_030817.1	41368225	41383605	-	0	0	0	2	0	0
circRNA11019	547	chrNC_030817.1	42304775	42305321	+	0	0	0	1	0	0
circRNA1102	530	chrNC_030808.1	113037707	113077478	-	5	0	1	1	0	0
circRNA11020	1055	chrNC_030817.1	42768822	42790720	-	0	0	0	2	0	0
circRNA11021	1195	chrNC_030817.1	43533673	43552034	-	0	0	0	2	0	2
circRNA11022	1868	chrNC_030817.1	43697630	43739860	+	0	0	0	1	0	0
circRNA11023	1173	chrNC_030817.1	43723117	43747187	+	0	0	0	1	0	0
circRNA11024	1095	chrNC_030817.1	45161447	45176147	-	0	0	0	1	0	0
circRNA11025	260	chrNC_030817.1	48277668	48278960	-	0	0	0	1	0	0
circRNA11026	403	chrNC_030817.1	48860453	48959939	-	0	0	0	4	0	0
circRNA11027	2029	chrNC_030817.1	49449927	49507457	-	0	0	0	1	0	0
circRNA11028	4262	chrNC_030817.1	54974538	55034842	-	0	0	0	2	0	0
circRNA11029	825	chrNC_030817.1	55001378	55013734	-	0	0	0	1	0	2
circRNA1103	372	chrNC_030808.1	115004821	115015993	-	1	2	1	2	5	3
circRNA11030	298	chrNC_030817.1	56628048	56647701	+	0	0	0	6	0	0
circRNA11031	1815	chrNC_030817.1	56726237	56741109	-	0	0	0	1	0	0
circRNA11032	1324	chrNC_030817.1	56756665	56769874	-	0	0	0	2	0	0
circRNA11033	286	chrNC_030817.1	56828607	56829016	-	0	0	0	4	0	0
circRNA11034	1335	chrNC_030817.1	56832907	56845289	-	0	0	0	1	0	0
circRNA11035	1559	chrNC_030817.1	56848816	56864429	-	0	0	0	1	0	0
circRNA11036	686	chrNC_030817.1	58130421	58131106	+	0	0	0	1	0	1
circRNA11037	1290	chrNC_030817.1	58492365	58515779	-	0	0	0	4	0	0
circRNA11038	926	chrNC_030817.1	58505784	58526942	-	0	0	0	2	0	0
circRNA11039	245	chrNC_030817.1	58526698	58526942	-	0	0	0	2	0	0
circRNA1104	379	chrNC_030808.1	117834975	117855782	-	2	0	0	3	0	0
circRNA11040	583	chrNC_030817.1	59297579	59302247	+	0	0	0	3	0	0
circRNA11041	959	chrNC_030817.1	59409820	59416457	+	0	0	0	1	0	0
circRNA11042	523	chrNC_030817.1	64754227	64756889	+	0	0	0	3	0	0
circRNA11043	2023	chrNC_030817.1	65949275	65963568	-	0	0	0	3	0	2
circRNA11044	883	chrNC_030817.1	66560951	66565777	+	0	0	0	1	0	0
circRNA11045	1733	chrNC_030817.1	67376222	67407662	-	0	0	0	3	0	0
circRNA11046	2371	chrNC_030817.1	67825846	67835372	-	0	0	0	1	0	0
circRNA11047	904	chrNC_030817.1	73177036	73312103	-	0	0	0	2	0	0
circRNA11048	802	chrNC_030817.1	74178891	74192278	+	0	0	0	1	0	1
circRNA11049	2034	chrNC_030817.1	76900986	76905007	+	0	0	0	1	0	0
circRNA1105	1487	chrNC_030808.1	118597532	118612682	-	6	12	8	7	9	9
circRNA11050	1384	chrNC_030817.1	77151745	77154419	-	0	0	0	1	0	0
circRNA11051	267	chrNC_030817.1	81032312	81036130	+	0	0	0	2	0	1
circRNA11052	417	chrNC_030817.1	81857649	81862965	+	0	0	0	3	0	0
circRNA11053	1953	chrNC_030817.1	82207350	82225072	+	0	0	0	2	0	0
circRNA11054	271	chrNC_030817.1	82255678	82255948	+	0	0	0	1	0	0
circRNA11055	460	chrNC_030817.1	82440028	82455839	+	0	0	0	3	0	0
circRNA11056	458	chrNC_030817.1	82446683	82469109	+	0	0	0	5	0	0
circRNA11057	1092	chrNC_030817.1	82485502	82508332	+	0	0	0	1	4	0
circRNA11058	473	chrNC_030817.1	86269708	86272595	-	0	0	0	1	0	0
circRNA11059	471	chrNC_030817.1	88518510	88520392	-	0	0	0	2	1	2
circRNA1106	451	chrNC_030808.1	118620038	118623944	-	2	0	1	0	0	6
circRNA11060	1140	chrNC_030817.1	88627018	88650789	+	0	0	0	2	0	0
circRNA11061	675	chrNC_030817.1	88868823	88876559	+	0	0	0	4	0	0
circRNA11062	333	chrNC_030817.1	89312998	89316900	+	0	0	0	2	0	0
circRNA11063	309	chrNC_030817.1	90608053	90621402	-	0	0	0	1	2	0
circRNA11064	208	chrNC_030817.1	91717670	91718857	-	0	0	0	1	5	3
circRNA11065	183	chrNC_030817.1	91932321	91932503	+	0	0	0	3	0	0
circRNA11066	768	chrNC_030817.1	92691629	92720299	-	0	0	0	3	0	0
circRNA11067	443	chrNC_030817.1	95576573	95593576	+	0	0	0	1	0	0
circRNA11068	242	chrNC_030817.1	96199633	96200013	+	0	0	0	1	0	0
circRNA11069	427	chrNC_030817.1	99512964	99530959	-	0	0	0	2	0	0
circRNA1107	601	chrNC_030808.1	118752350	118767580	-	3	0	1	0	0	0
circRNA11070	630	chrNC_030817.1	99566365	99595119	-	0	0	0	1	0	0
circRNA11071	236	chrNC_030817.1	99609246	99653197	-	0	0	0	1	0	0
circRNA11072	612	chrNC_030817.1	100257384	100278663	+	0	0	0	1	0	0
circRNA11073	257	chrNC_030817.1	100406172	100421377	-	0	0	0	3	0	0
circRNA11074	385	chrNC_030813.1	2369868	2381677	-	0	0	0	3	0	0
circRNA11075	435	chrNC_030813.1	4988398	5021476	+	0	0	0	3	2	0
circRNA11076	1202	chrNC_030813.1	6461268	6465153	-	0	0	0	5	8	0
circRNA11077	1085	chrNC_030813.1	6919099	6956735	+	0	0	0	2	0	0
circRNA11078	348	chrNC_030813.1	13342054	13342401	-	0	0	0	1	0	1
circRNA11079	511	chrNC_030813.1	13371552	13376256	+	0	0	0	3	2	0
circRNA1108	229	chrNC_030808.1	121976892	121981713	+	1	0	0	0	0	0
circRNA11080	512	chrNC_030813.1	16143636	16146479	-	0	0	0	1	0	0
circRNA11081	484	chrNC_030813.1	16161607	16171936	-	0	0	0	1	0	0
circRNA11082	342	chrNC_030813.1	17861763	17863521	+	0	0	0	1	0	0
circRNA11083	336	chrNC_030813.1	19387723	19401895	+	0	0	0	1	0	0
circRNA11084	609	chrNC_030813.1	22002415	22004600	+	0	0	0	1	0	0
circRNA11085	1107	chrNC_030813.1	22359164	22409237	+	0	0	0	3	0	0
circRNA11086	428	chrNC_030813.1	22514424	22518177	-	0	0	0	2	1	0
circRNA11087	609	chrNC_030813.1	22964447	23005075	-	0	0	0	2	0	0
circRNA11088	1098	chrNC_030813.1	23879859	24004139	+	0	0	0	1	0	0
circRNA11089	772	chrNC_030813.1	23966019	24004139	+	0	0	0	4	0	0
circRNA1109	506	chrNC_030808.1	121976892	121997882	+	1	0	0	1	1	0
circRNA11090	222	chrNC_030813.1	29699969	29700190	+	0	0	0	9	0	0
circRNA11091	1300	chrNC_030813.1	29763570	29841109	+	0	0	0	2	0	0
circRNA11092	315	chrNC_030813.1	29874587	29876831	+	0	0	0	2	1	0
circRNA11093	857	chrNC_030813.1	30538247	30607415	-	0	0	0	3	0	0
circRNA11094	1097	chrNC_030813.1	30880029	30917625	-	0	0	0	1	0	0
circRNA11095	428	chrNC_030813.1	36425137	36487196	+	0	0	0	2	0	0
circRNA11096	378	chrNC_030813.1	36611890	36615881	-	0	0	0	2	0	0
circRNA11097	672	chrNC_030813.1	42422027	42437724	-	0	0	0	1	0	0
circRNA11098	1903	chrNC_030813.1	42437095	42490461	-	0	0	0	1	0	0
circRNA11099	1042	chrNC_030813.1	42465231	42485643	-	0	0	0	1	1	2
circRNA111	368	chrNC_030829.1	57754749	57764234	-	4	4	0	0	0	2
circRNA1110	668	chrNC_030808.1	121976892	122002234	+	5	0	3	0	5	0
circRNA11100	434	chrNC_030813.1	57532636	57540805	-	0	0	0	1	3	3
circRNA11101	790	chrNC_030813.1	57904595	57911446	+	0	0	0	3	0	6
circRNA11102	685	chrNC_030813.1	59040401	59044233	-	0	0	0	1	0	0
circRNA11103	1409	chrNC_030813.1	63865674	63883316	+	0	0	0	3	0	0
circRNA11104	929	chrNC_030813.1	66119908	66136018	-	0	0	0	1	0	0
circRNA11105	965	chrNC_030813.1	67150797	67179827	-	0	0	0	1	0	0
circRNA11106	175	chrNC_030813.1	67154872	67160307	-	0	0	0	1	0	0
circRNA11107	491	chrNC_030813.1	67845006	67860193	-	0	0	0	2	0	0
circRNA11108	558	chrNC_030813.1	68030403	68045490	+	0	0	0	1	0	0
circRNA11109	426	chrNC_030813.1	69312229	69397966	-	0	0	0	1	0	0
circRNA1111	2334	chrNC_030808.1	125507433	125536503	-	1	0	0	0	0	0
circRNA11110	422	chrNC_030813.1	70311063	70312411	+	0	0	0	3	0	0
circRNA11111	354	chrNC_030813.1	71455309	71459599	-	0	0	0	2	0	0
circRNA11112	1088	chrNC_030813.1	71933163	71946762	+	0	0	0	1	0	0
circRNA11113	1666	chrNC_030813.1	71934820	71962962	+	0	0	0	2	0	0
circRNA11114	984	chrNC_030813.1	71983996	71995386	+	0	0	0	5	0	3
circRNA11115	396	chrNC_030813.1	72354616	72355102	-	0	0	0	1	0	0
circRNA11116	380	chrNC_030813.1	83893997	83897096	-	0	0	0	1	0	0
circRNA11117	1788	chrNC_030813.1	83910574	83957845	-	0	0	0	1	0	0
circRNA11118	1114	chrNC_030813.1	84066691	84097458	-	0	0	0	1	0	0
circRNA11119	261	chrNC_030813.1	86801135	86809977	+	0	0	0	2	0	0
circRNA1112	544	chrNC_030808.1	125751919	125770550	+	2	6	4	5	6	2
circRNA11120	767	chrNC_030813.1	87184073	87233871	+	0	0	0	2	0	0
circRNA11121	1328	chrNC_030813.1	88737092	88764215	-	0	0	0	3	0	0
circRNA11122	1167	chrNC_030813.1	88752687	88769183	-	0	0	0	2	0	0
circRNA11123	954	chrNC_030813.1	88762807	88769183	-	0	0	0	1	3	0
circRNA11124	1103	chrNC_030813.1	88762807	88777203	-	0	0	0	1	0	0
circRNA11125	1678	chrNC_030813.1	88765854	88785110	-	0	0	0	1	0	0
circRNA11126	229	chrNC_030813.1	91098028	91105466	+	0	0	0	1	0	0
circRNA11127	415	chrNC_030813.1	93073456	93077716	+	0	0	0	2	1	0
circRNA11128	300	chrNC_030813.1	93791480	93799069	+	0	0	0	4	0	1
circRNA11129	171	chrNC_030813.1	93798979	93805219	+	0	0	0	2	0	0
circRNA1113	1152	chrNC_030808.1	125808094	125827340	-	2	0	0	0	6	4
circRNA11130	1050	chrNC_030813.1	94050544	94082130	+	0	0	0	1	0	2
circRNA11131	317	chrNC_030813.1	94068481	94077877	+	0	0	0	3	0	0
circRNA11132	345	chrNC_030813.1	94074879	94082130	+	0	0	0	1	0	0
circRNA11133	241	chrNC_030813.1	94077798	94082130	+	0	0	0	1	2	1
circRNA11134	627	chrNC_030813.1	94089580	94092851	+	0	0	0	1	0	0
circRNA11135	643	chrNC_030813.1	98157751	98163625	-	0	0	0	1	0	0
circRNA11136	409	chrNC_030813.1	98308438	98313663	+	0	0	0	1	0	0
circRNA11137	650	chrNC_030813.1	98675696	98681182	-	0	0	0	2	0	2
circRNA11138	1000	chrNC_030813.1	99984443	100002364	-	0	0	0	1	0	0
circRNA11139	223	chrNC_030813.1	99990665	99993062	-	0	0	0	5	0	0
circRNA1114	1307	chrNC_030808.1	125808094	125837611	-	2	0	0	0	2	2
circRNA11140	1198	chrNC_030813.1	100003439	100020224	-	0	0	0	1	3	0
circRNA11141	331	chrNC_030813.1	101215656	101237777	+	0	0	0	1	1	0
circRNA11142	554	chrNC_030813.1	101982315	102018238	+	0	0	0	2	0	0
circRNA11143	726	chrNC_030813.1	102107290	102110554	+	0	0	0	4	0	0
circRNA11144	239	chrNC_030813.1	103768419	103772746	-	0	0	0	5	0	0
circRNA11145	1476	chrNC_030813.1	103798125	103848180	-	0	0	0	2	0	1
circRNA11146	695	chrNC_030813.1	103877130	103910174	+	0	0	0	1	0	0
circRNA11147	333	chrNC_030813.1	105586627	105589849	-	0	0	0	1	0	0
circRNA11148	584	chrNC_030813.1	110995797	111004383	+	0	0	0	3	0	0
circRNA11149	701	chrNC_030813.1	111641580	111654575	-	0	0	0	1	0	0
circRNA1115	358	chrNC_030808.1	125827138	125837611	-	2	0	0	0	0	0
circRNA11150	467	chrNC_030813.1	111652236	111657481	-	0	0	0	1	0	0
circRNA11151	524	chrNC_030813.1	113033257	113046030	-	0	0	0	3	0	0
circRNA11152	484	chrNC_030813.1	113645951	113657648	+	0	0	0	2	0	0
circRNA11153	984	chrNC_030813.1	114319367	114365740	-	0	0	0	1	0	0
circRNA11154	822	chrNC_030813.1	116482969	116494748	+	0	0	0	5	0	0
circRNA11155	4276	chrNC_030813.1	116869530	116919504	+	0	0	0	1	0	0
circRNA11156	540	chrNC_030811.1	340653	343095	-	0	0	0	2	0	2
circRNA11157	2388	chrNC_030811.1	480376	524802	+	0	0	0	1	0	0
circRNA11158	222	chrNC_030811.1	490486	491313	+	0	0	0	2	0	0
circRNA11159	993	chrNC_030811.1	2925411	2940679	+	0	0	0	1	0	0
circRNA1116	1876	chrNC_030808.1	126028771	126068863	+	2	1	3	4	0	5
circRNA11160	1138	chrNC_030811.1	5096928	5166415	+	0	0	0	3	0	0
circRNA11161	1943	chrNC_030811.1	5164214	5198601	+	0	0	0	1	0	0
circRNA11162	1656	chrNC_030811.1	5177550	5198601	+	0	0	0	1	0	0
circRNA11163	1440	chrNC_030811.1	5192815	5215477	+	0	0	0	2	0	0
circRNA11164	376	chrNC_030811.1	5244795	5248463	+	0	0	0	1	0	0
circRNA11165	744	chrNC_030811.1	5301332	5310900	-	0	0	0	1	1	0
circRNA11166	293	chrNC_030811.1	5760552	5763562	+	0	0	0	1	6	0
circRNA11167	355	chrNC_030811.1	6073046	6073483	+	0	0	0	1	0	0
circRNA11168	638	chrNC_030811.1	6174870	6176683	-	0	0	0	3	0	0
circRNA11169	253	chrNC_030811.1	8629572	8630380	+	0	0	0	3	4	1
circRNA1117	1474	chrNC_030808.1	126084096	126099864	+	1	0	0	0	0	0
circRNA11170	991	chrNC_030811.1	8629572	8653489	+	0	0	0	2	0	0
circRNA11171	246	chrNC_030811.1	8630252	8642426	+	0	0	0	1	0	0
circRNA11172	316	chrNC_030811.1	12736423	12782199	+	0	0	0	6	0	0
circRNA11173	1454	chrNC_030811.1	16303856	16344025	+	0	0	0	1	0	0
circRNA11174	721	chrNC_030811.1	16325093	16340020	+	0	0	0	2	0	0
circRNA11175	393	chrNC_030811.1	17651798	17661994	-	0	0	0	1	0	0
circRNA11176	706	chrNC_030811.1	18138607	18143957	-	0	0	0	2	0	0
circRNA11177	726	chrNC_030811.1	18143789	18155751	-	0	0	0	4	0	1
circRNA11178	904	chrNC_030811.1	18779156	18800791	+	0	0	0	1	0	0
circRNA11179	1047	chrNC_030811.1	20998448	21008529	-	0	0	0	1	0	0
circRNA1118	903	chrNC_030808.1	126159047	126170829	+	1	0	0	0	0	0
circRNA11180	696	chrNC_030811.1	26009417	26013676	+	0	0	0	1	0	0
circRNA11181	1470	chrNC_030811.1	27006069	27012332	-	0	0	0	1	0	0
circRNA11182	420	chrNC_030811.1	27206443	27209551	+	0	0	0	1	0	0
circRNA11183	422	chrNC_030811.1	27398591	27403192	-	0	0	0	2	0	0
circRNA11184	762	chrNC_030811.1	28194572	28209871	-	0	0	0	3	0	0
circRNA11185	334	chrNC_030811.1	38074400	38084624	-	0	0	0	3	0	0
circRNA11186	471	chrNC_030811.1	38083129	38119554	-	0	0	0	1	0	0
circRNA11187	255	chrNC_030811.1	41186085	41187896	-	0	0	0	2	0	0
circRNA11188	469	chrNC_030811.1	41186085	41189570	-	0	0	0	1	0	0
circRNA11189	857	chrNC_030811.1	49227151	49249489	-	0	0	0	5	0	3
circRNA1119	269	chrNC_030808.1	126892868	126896969	-	1	0	6	2	5	1
circRNA11190	760	chrNC_030811.1	49261759	49268848	-	0	0	0	1	0	0
circRNA11191	401	chrNC_030811.1	50484331	50489234	+	0	0	0	3	0	0
circRNA11192	515	chrNC_030811.1	50918795	50957609	-	0	0	0	4	2	0
circRNA11193	402	chrNC_030811.1	50924714	50957609	-	0	0	0	2	0	0
circRNA11194	1224	chrNC_030811.1	51858957	51882458	+	0	0	0	2	0	0
circRNA11195	906	chrNC_030811.1	53827172	53855722	-	0	0	0	1	0	0
circRNA11196	420	chrNC_030811.1	54349902	54359734	-	0	0	0	1	0	0
circRNA11197	1315	chrNC_030811.1	56393857	56418190	+	0	0	0	9	0	3
circRNA11198	722	chrNC_030811.1	58962167	58983051	+	0	0	0	2	0	0
circRNA11199	496	chrNC_030811.1	59388914	59391033	+	0	0	0	1	0	0
circRNA112	865	chrNC_030829.1	57754749	57779404	-	1	0	0	0	0	0
circRNA1120	956	chrNC_030808.1	126899781	126923180	-	1	0	0	0	0	0
circRNA11200	737	chrNC_030811.1	63643133	63661713	-	0	0	0	1	0	0
circRNA11201	592	chrNC_030811.1	63657195	63676177	-	0	0	0	1	0	0
circRNA11202	365	chrNC_030811.1	63828878	63838438	-	0	0	0	1	0	0
circRNA11203	710	chrNC_030811.1	64154408	64200223	+	0	0	0	1	0	0
circRNA11204	171	chrNC_030811.1	64702017	64702187	-	0	0	0	1	0	0
circRNA11205	1098	chrNC_030811.1	69671084	69698660	-	0	0	0	1	0	0
circRNA11206	323	chrNC_030811.1	71702444	71711869	+	0	0	0	1	7	0
circRNA11207	357	chrNC_030811.1	71844350	71867531	+	0	0	0	1	0	0
circRNA11208	1042	chrNC_030811.1	73675982	73706220	+	0	0	0	1	0	0
circRNA11209	519	chrNC_030811.1	74902490	74919580	+	0	0	0	1	0	0
circRNA1121	336	chrNC_030808.1	126915992	126923180	-	4	6	6	7	2	0
circRNA11210	2111	chrNC_030811.1	76633149	76679381	+	0	0	0	1	0	0
circRNA11211	1063	chrNC_030811.1	76665826	76671207	+	0	0	0	1	0	0
circRNA11212	903	chrNC_030811.1	76904723	76921280	+	0	0	0	4	0	0
circRNA11213	1316	chrNC_030811.1	80189992	80252119	-	0	0	0	1	0	0
circRNA11214	334	chrNC_030811.1	83818987	83875403	-	0	0	0	2	0	0
circRNA11215	450	chrNC_030811.1	87195399	87206319	+	0	0	0	2	0	0
circRNA11216	352	chrNC_030811.1	87337262	87344018	+	0	0	0	3	6	0
circRNA11217	1534	chrNC_030811.1	87337262	87378921	+	0	0	0	4	0	0
circRNA11218	677	chrNC_030811.1	87339873	87351077	+	0	0	0	4	0	0
circRNA11219	827	chrNC_030811.1	88280205	88293788	+	0	0	0	1	0	0
circRNA1122	394	chrNC_030808.1	126942777	126966802	-	33	52	16	27	25	36
circRNA11220	947	chrNC_030811.1	88789990	88807975	-	0	0	0	3	0	0
circRNA11221	658	chrNC_030811.1	88940406	88957319	+	0	0	0	6	0	0
circRNA11222	1968	chrNC_030811.1	91416361	91460707	-	0	0	0	1	0	0
circRNA11223	1064	chrNC_030811.1	93234016	93278436	-	0	0	0	2	2	1
circRNA11224	800	chrNC_030811.1	93254809	93278436	-	0	0	0	2	0	0
circRNA11225	300	chrNC_030811.1	95797127	95835834	+	0	0	0	3	0	0
circRNA11226	553	chrNC_030811.1	108602091	108614315	+	0	0	0	2	1	0
circRNA11227	1284	chrNC_030811.1	108697328	108713190	-	0	0	0	3	0	0
circRNA11228	972	chrNC_030811.1	108706892	108716484	-	0	0	0	1	0	0
circRNA11229	785	chrNC_030811.1	109949441	109993882	-	0	0	0	1	0	0
circRNA1123	521	chrNC_030808.1	130116103	130122846	+	31	45	0	33	0	26
circRNA11230	256	chrNC_030811.1	110152823	110153078	+	0	0	0	1	0	0
circRNA11231	1002	chrNC_030811.1	110758280	110761211	+	0	0	0	1	2	0
circRNA11232	1212	chrNC_030811.1	110914300	110955696	-	0	0	0	1	0	1
circRNA11233	541	chrNC_030811.1	111227652	111239124	-	0	0	0	1	0	0
circRNA11234	291	chrNC_030811.1	111256058	111258335	-	0	0	0	1	0	0
circRNA11235	577	chrNC_030811.1	112210879	112407160	-	0	0	0	1	0	0
circRNA11236	672	chrNC_030811.1	112210879	112445824	-	0	0	0	2	0	0
circRNA11237	921	chrNC_030811.1	112210879	112466230	-	0	0	0	2	0	0
circRNA11238	501	chrNC_030811.1	115219952	115252669	-	0	0	0	1	0	0
circRNA11239	494	chrNC_030823.1	2344947	2346466	-	0	0	0	3	0	0
circRNA1124	249	chrNC_030808.1	130154785	130156638	+	5	0	0	0	0	0
circRNA11240	408	chrNC_030823.1	3531294	3539323	+	0	0	0	1	0	3
circRNA11241	1043	chrNC_030823.1	3550517	3592719	+	0	0	0	3	0	0
circRNA11242	380	chrNC_030823.1	10806836	10820626	+	0	0	0	1	0	0
circRNA11243	217	chrNC_030823.1	10810889	10817787	+	0	0	0	1	0	0
circRNA11244	1045	chrNC_030823.1	19634341	19644690	-	0	0	0	5	0	0
circRNA11245	709	chrNC_030823.1	22022708	22032376	-	0	0	0	1	0	0
circRNA11246	1190	chrNC_030823.1	22120334	22148762	+	0	0	0	4	0	0
circRNA11247	914	chrNC_030823.1	22147577	22154791	+	0	0	0	1	0	0
circRNA11248	365	chrNC_030823.1	22150390	22152181	+	0	0	0	4	0	0
circRNA11249	1598	chrNC_030823.1	22191390	22212278	-	0	0	0	4	0	0
circRNA1125	369	chrNC_030808.1	130614319	130618631	+	1	0	0	0	0	0
circRNA11250	350	chrNC_030823.1	25005420	25006956	+	0	0	0	3	0	0
circRNA11251	448	chrNC_030823.1	25005420	25008952	+	0	0	0	2	2	0
circRNA11252	207	chrNC_030823.1	25933742	25947560	-	0	0	0	1	0	0
circRNA11253	734	chrNC_030823.1	27120608	27171726	-	0	0	0	2	0	1
circRNA11254	515	chrNC_030823.1	27573040	27576113	-	0	0	0	1	0	0
circRNA11255	748	chrNC_030823.1	30257284	30267851	-	0	0	0	1	0	0
circRNA11256	399	chrNC_030823.1	31887707	32043108	+	0	0	0	1	0	0
circRNA11257	1079	chrNC_030823.1	32042997	32123120	+	0	0	0	1	0	0
circRNA11258	1764	chrNC_030823.1	38581967	38599428	+	0	0	0	1	0	0
circRNA11259	1357	chrNC_030823.1	38586441	38596837	+	0	0	0	3	3	1
circRNA1126	498	chrNC_030808.1	130614319	130621939	+	3	2	6	0	0	0
circRNA11260	720	chrNC_030823.1	39812392	39819721	-	0	0	0	1	0	0
circRNA11261	431	chrNC_030823.1	40648894	40650391	-	0	0	0	1	0	0
circRNA11262	234	chrNC_030823.1	40990749	40991892	+	0	0	0	1	0	0
circRNA11263	325	chrNC_030823.1	42148624	42154673	+	0	0	0	3	0	0
circRNA11264	708	chrNC_030823.1	43364084	43466290	+	0	0	0	1	1	0
circRNA11265	300	chrNC_030823.1	49383396	49399280	+	0	0	0	6	0	0
circRNA11266	227	chrNC_030823.1	49403096	49404386	+	0	0	0	3	0	0
circRNA11267	495	chrNC_030823.1	49745530	49752133	+	0	0	0	1	0	0
circRNA11268	367	chrNC_030823.1	50395801	50398814	-	0	0	0	1	0	2
circRNA11269	395	chrNC_030823.1	50459102	50466887	-	0	0	0	1	1	0
circRNA1127	244	chrNC_030808.1	131832282	131832525	-	4	0	6	1	8	5
circRNA11270	1041	chrNC_030823.1	50465468	50486188	-	0	0	0	1	0	0
circRNA11271	280	chrNC_030823.1	52336870	52346867	-	0	0	0	1	0	0
circRNA11272	502	chrNC_030823.1	52336870	52358643	-	0	0	0	4	0	1
circRNA11273	282	chrNC_030823.1	52480787	52482691	-	0	0	0	1	0	0
circRNA11274	270	chrNC_030823.1	54146637	54150716	+	0	0	0	1	0	0
circRNA11275	372	chrNC_030823.1	54703633	54718026	+	0	0	0	2	0	0
circRNA11276	435	chrNC_030823.1	59254957	59259934	+	0	0	0	3	0	0
circRNA11277	737	chrNC_030823.1	59257054	59263204	+	0	0	0	1	1	0
circRNA11278	381	chrNC_030823.1	59261189	59263204	+	0	0	0	4	0	1
circRNA11279	649	chrNC_030823.1	59287357	59302324	+	0	0	0	1	0	0
circRNA1128	644	chrNC_030808.1	132347907	132397145	+	1	0	0	0	5	2
circRNA11280	1146	chrNC_030823.1	59856045	59884663	+	0	0	0	2	0	0
circRNA11281	1267	chrNC_030823.1	60553793	60599034	+	0	0	0	1	0	0
circRNA11282	274	chrNC_030823.1	62527649	62528720	+	0	0	0	1	0	0
circRNA11283	547	chrNC_030823.1	62563886	62565489	+	0	0	0	1	0	0
circRNA11284	1005	chrNC_030823.1	64897959	64903363	-	0	0	0	1	0	0
circRNA11285	351	chrNC_030823.1	64902057	64903363	-	0	0	0	2	0	0
circRNA11286	409	chrNC_030823.1	65532992	65535402	+	0	0	0	2	0	2
circRNA11287	1281	chrNC_030823.1	65535258	65590773	+	0	0	0	2	0	0
circRNA11288	3063	chrNC_030823.1	65535258	65617181	+	0	0	0	1	0	0
circRNA11289	401	chrNC_030823.1	65571213	65579792	+	0	0	0	2	0	2
circRNA1129	624	chrNC_030808.1	132379822	132411038	+	2	0	1	1	0	0
circRNA11290	950	chrNC_030823.1	65573814	65601768	+	0	0	0	4	0	1
circRNA11291	1006	chrNC_030823.1	65590579	65604174	+	0	0	0	4	0	0
circRNA11292	474	chrNC_030823.1	65615487	65617181	+	0	0	0	2	0	0
circRNA11293	10626	chrNC_030823.1	65633099	65813846	+	0	0	0	1	0	0
circRNA11294	279	chrNC_030823.1	65634950	65637014	+	0	0	0	2	0	0
circRNA11295	555	chrNC_030823.1	65661400	65664436	+	0	0	0	7	0	0
circRNA11296	1563	chrNC_030823.1	65661400	65684011	+	0	0	0	3	2	0
circRNA11297	849	chrNC_030823.1	65678712	65688330	+	0	0	0	1	0	0
circRNA11298	1377	chrNC_030823.1	65754355	65766795	+	0	0	0	1	0	0
circRNA11299	1020	chrNC_030823.1	65787432	65795747	+	0	0	0	1	0	1
circRNA113	1032	chrNC_030829.1	59079667	59085516	+	1	0	0	0	0	0
circRNA1130	1415	chrNC_030808.1	132427850	132471459	+	1	0	0	0	0	0
circRNA11300	191	chrNC_030823.1	65787946	65788136	+	0	0	0	1	0	0
circRNA11301	712	chrNC_030823.1	66090565	66101983	+	0	0	0	1	0	0
circRNA11302	573	chrNC_030823.1	69118868	69144899	-	0	0	0	3	0	0
circRNA11303	299	chrNC_030823.1	69867684	69874080	-	0	0	0	2	4	0
circRNA11304	131	chrNC_030823.1	70749120	70751844	-	0	0	0	3	0	0
circRNA11305	480	chrNC_030823.1	74651992	74652687	-	0	0	0	4	1	1
circRNA11306	2475	chrNC_030823.1	74659850	74675418	-	0	0	0	3	0	0
circRNA11307	477	chrNC_030823.1	75133967	75169994	-	0	0	0	1	4	0
circRNA11308	681	chrNC_030823.1	75147063	75196668	-	0	0	0	6	2	0
circRNA11309	1640	chrNC_030823.1	77829564	77835358	-	0	0	0	3	0	0
circRNA1131	436	chrNC_030808.1	132525637	132546726	-	4	3	1	11	3	5
circRNA11310	1698	chrNC_030823.1	78688514	78739316	-	0	0	0	1	0	0
circRNA11311	2336	chrNC_030833.1	5539505	5613520	-	0	0	0	5	0	0
circRNA11312	427	chrNC_030833.1	5596635	5613520	-	0	0	0	1	0	0
circRNA11313	920	chrNC_030833.1	6490601	6505020	+	0	0	0	1	0	3
circRNA11314	836	chrNC_030833.1	10158184	10175290	+	0	0	0	11	7	5
circRNA11315	1151	chrNC_030833.1	10158184	10235735	+	0	0	0	1	4	0
circRNA11316	1072	chrNC_030833.1	11095727	11104313	-	0	0	0	4	0	0
circRNA11317	1204	chrNC_030833.1	11122626	11138095	-	0	0	0	3	0	4
circRNA11318	294	chrNC_030833.1	11964015	11968582	-	0	0	0	1	0	0
circRNA11319	516	chrNC_030833.1	12022188	12025915	+	0	0	0	1	0	0
circRNA1132	296	chrNC_030808.1	132757978	132765282	-	1	10	11	12	10	7
circRNA11320	729	chrNC_030833.1	12211106	12213600	-	0	0	0	2	0	0
circRNA11321	350	chrNC_030833.1	12329965	12341910	+	0	0	0	2	3	0
circRNA11322	491	chrNC_030833.1	16675845	16676521	-	0	0	0	1	0	0
circRNA11323	695	chrNC_030833.1	17692173	17701368	+	0	0	0	2	0	0
circRNA11324	256	chrNC_030833.1	20456884	20457679	-	0	0	0	2	0	0
circRNA11325	364	chrNC_030833.1	27203748	27208047	-	0	0	0	1	0	3
circRNA11326	452	chrNC_030833.1	28057506	28062813	-	0	0	0	1	0	0
circRNA11327	1929	chrNC_030833.1	28940356	29007388	+	0	0	0	1	0	0
circRNA11328	687	chrNC_030833.1	29126255	29131633	+	0	0	0	4	0	0
circRNA11329	276	chrNC_030833.1	29423051	29481617	-	0	0	0	3	0	0
circRNA1133	912	chrNC_030808.1	134344866	134355357	-	1	0	0	2	0	0
circRNA11330	318	chrNC_030833.1	29883112	29885546	-	0	0	0	1	0	0
circRNA11331	667	chrNC_030833.1	30534708	30541635	+	0	0	0	1	0	0
circRNA11332	200	chrNC_030833.1	30580817	30583154	+	0	0	0	4	0	0
circRNA11333	549	chrNC_030833.1	32782013	32790955	-	0	0	0	2	0	0
circRNA11334	319	chrNC_030833.1	33712277	33724770	+	0	0	0	3	0	2
circRNA11335	334	chrNC_030833.1	35562624	35565977	-	0	0	0	8	4	2
circRNA11336	540	chrNC_030833.1	36561804	36567154	-	0	0	0	1	0	1
circRNA11337	837	chrNC_030833.1	36704652	36716355	+	0	0	0	1	0	0
circRNA11338	541	chrNC_030833.1	36709595	36716355	+	0	0	0	1	1	1
circRNA11339	411	chrNC_030833.1	36726239	36735385	+	0	0	0	1	0	0
circRNA1134	285	chrNC_030808.1	134344866	134346465	-	3	0	0	0	0	0
circRNA11340	2128	chrNC_030833.1	37862634	37887680	-	0	0	0	1	0	0
circRNA11341	922	chrNC_030833.1	39970717	39977566	-	0	0	0	1	0	0
circRNA11342	353	chrNC_030833.1	40085020	40085372	+	0	0	0	20	0	22
circRNA11343	301	chrNC_030833.1	40763328	40766180	-	0	0	0	1	0	2
circRNA11344	321	chrNC_030819.1	2626294	2634612	-	0	0	0	3	0	0
circRNA11345	330	chrNC_030819.1	9050559	9051151	+	0	0	0	3	5	0
circRNA11346	422	chrNC_030819.1	9218619	9289248	-	0	0	0	2	0	0
circRNA11347	474	chrNC_030819.1	10455194	10464281	+	0	0	0	2	0	0
circRNA11348	732	chrNC_030819.1	10866927	10890487	-	0	0	0	1	0	0
circRNA11349	412	chrNC_030819.1	10887881	10890487	-	0	0	0	3	0	0
circRNA1135	512	chrNC_030808.1	134351160	134355357	-	1	0	0	0	0	1
circRNA11350	741	chrNC_030819.1	10887881	10906018	-	0	0	0	4	0	0
circRNA11351	773	chrNC_030819.1	13020295	13056829	+	0	0	0	1	0	0
circRNA11352	426	chrNC_030819.1	13122007	13123375	+	0	0	0	3	0	0
circRNA11353	529	chrNC_030819.1	13181142	13188118	-	0	0	0	1	0	0
circRNA11354	430	chrNC_030819.1	33785540	33790708	+	0	0	0	3	0	0
circRNA11355	586	chrNC_030819.1	35520126	35531959	-	0	0	0	2	0	0
circRNA11356	547	chrNC_030819.1	37739302	37739848	+	0	0	0	3	0	0
circRNA11357	451	chrNC_030819.1	40062027	40186774	+	0	0	0	2	0	0
circRNA11358	2793	chrNC_030819.1	50253214	50268743	-	0	0	0	1	0	0
circRNA11359	813	chrNC_030819.1	50867383	50880069	+	0	0	0	2	0	0
circRNA1136	219	chrNC_030808.1	134387560	134388610	-	7	0	0	1	0	0
circRNA11360	248	chrNC_030819.1	51030385	51035813	-	0	0	0	3	0	0
circRNA11361	260	chrNC_030819.1	51173742	51174387	-	0	0	0	1	0	0
circRNA11362	1840	chrNC_030819.1	52114087	52121208	-	0	0	0	5	0	0
circRNA11363	1149	chrNC_030819.1	52430045	52454630	-	0	0	0	3	0	0
circRNA11364	353	chrNC_030819.1	54861188	54864021	+	0	0	0	3	0	0
circRNA11365	343	chrNC_030819.1	57896830	57906227	+	0	0	0	4	0	0
circRNA11366	1843	chrNC_030819.1	58117018	58121614	-	0	0	0	3	0	0
circRNA11367	937	chrNC_030819.1	58312247	58341369	+	0	0	0	2	0	0
circRNA11368	1533	chrNC_030819.1	58689744	58709333	-	0	0	0	1	0	0
circRNA11369	845	chrNC_030819.1	62509305	62531494	-	0	0	0	1	0	0
circRNA1137	247	chrNC_030808.1	134405843	134408570	-	6	6	6	5	6	7
circRNA11370	590	chrNC_030819.1	63929859	63940280	+	0	0	0	3	0	0
circRNA11371	411	chrNC_030819.1	65243164	65246752	+	0	0	0	2	0	0
circRNA11372	575	chrNC_030819.1	65418701	65440879	-	0	0	0	1	0	0
circRNA11373	928	chrNC_030819.1	67757432	67761567	-	0	0	0	3	0	0
circRNA11374	292	chrNC_030819.1	68346727	68348484	-	0	0	0	1	0	0
circRNA11375	666	chrNC_030819.1	69907228	69921111	-	0	0	0	2	3	0
circRNA11376	538	chrNC_030819.1	69909682	69921111	-	0	0	0	2	0	0
circRNA11377	279	chrNC_030819.1	70184496	70186411	+	0	0	0	4	0	0
circRNA11378	1314	chrNC_030819.1	70951289	70965871	-	0	0	0	6	2	0
circRNA11379	392	chrNC_030819.1	72459400	72462156	-	0	0	0	1	0	0
circRNA1138	604	chrNC_030808.1	134538935	134540505	+	1	0	0	0	2	0
circRNA11380	788	chrNC_030819.1	73026711	73120490	+	0	0	0	1	0	0
circRNA11381	1049	chrNC_030819.1	74495943	74551466	+	0	0	0	1	0	0
circRNA11382	1459	chrNC_030819.1	74520095	74579509	+	0	0	0	1	0	0
circRNA11383	649	chrNC_030819.1	74593892	74613401	+	0	0	0	2	0	0
circRNA11384	726	chrNC_030819.1	74593892	74634541	+	0	0	0	1	0	0
circRNA11385	284	chrNC_030819.1	74730396	74737085	+	0	0	0	1	0	0
circRNA11386	1301	chrNC_030819.1	74988227	75003049	-	0	0	0	2	0	0
circRNA11387	329	chrNC_030819.1	75251442	75254025	-	0	0	0	1	0	0
circRNA11388	1178	chrNC_030819.1	75348817	75367484	+	0	0	0	2	2	2
circRNA11389	721	chrNC_030819.1	75365078	75367484	+	0	0	0	3	0	1
circRNA1139	308	chrNC_030808.1	134540198	134540505	+	1	0	2	0	0	0
circRNA11390	533	chrNC_030819.1	84061503	84117148	-	0	0	0	1	0	0
circRNA11391	788	chrNC_030819.1	84860800	84898217	+	0	0	0	2	0	0
circRNA11392	578	chrNC_030827.1	2880206	2895911	+	0	0	0	3	0	0
circRNA11393	1212	chrNC_030827.1	2880206	2903425	+	0	0	0	12	7	8
circRNA11394	979	chrNC_030827.1	2892071	2903425	+	0	0	0	2	0	0
circRNA11395	1116	chrNC_030827.1	2892952	2958684	+	0	0	0	4	0	0
circRNA11396	485	chrNC_030827.1	3941995	3952827	-	0	0	0	2	0	0
circRNA11397	199	chrNC_030827.1	3968039	3975194	-	0	0	0	3	0	0
circRNA11398	237	chrNC_030827.1	4070563	4070799	-	0	0	0	2	0	0
circRNA11399	904	chrNC_030827.1	10049533	10052107	-	0	0	0	1	0	0
circRNA114	1171	chrNC_030829.1	59079667	59087294	+	3	0	0	0	0	0
circRNA1140	411	chrNC_030808.1	134679232	134695950	+	2	0	0	1	0	6
circRNA11400	3322	chrNC_030827.1	10056192	10068843	-	0	0	0	1	0	0
circRNA11401	620	chrNC_030827.1	10082154	10095059	-	0	0	0	1	1	0
circRNA11402	569	chrNC_030827.1	10361443	10363667	-	0	0	0	1	0	0
circRNA11403	636	chrNC_030827.1	10443382	10452390	-	0	0	0	1	0	0
circRNA11404	1005	chrNC_030827.1	13561763	13584341	-	0	0	0	5	0	0
circRNA11405	365	chrNC_030827.1	13584267	13595838	-	0	0	0	1	0	0
circRNA11406	409	chrNC_030827.1	13812327	13816263	-	0	0	0	1	0	0
circRNA11407	429	chrNC_030827.1	14012334	14022408	+	0	0	0	4	0	0
circRNA11408	1789	chrNC_030827.1	14052132	14192985	+	0	0	0	1	0	0
circRNA11409	289	chrNC_030827.1	14183620	14192985	+	0	0	0	5	2	5
circRNA1141	556	chrNC_030808.1	134679232	134700145	+	11	20	21	12	20	17
circRNA11410	339	chrNC_030827.1	14257128	14259604	+	0	0	0	3	0	0
circRNA11411	332	chrNC_030827.1	16857321	16866597	-	0	0	0	1	1	0
circRNA11412	766	chrNC_030827.1	18397546	18418329	+	0	0	0	2	0	0
circRNA11413	682	chrNC_030827.1	22081662	22085130	-	0	0	0	1	0	0
circRNA11414	1554	chrNC_030827.1	23506438	23583230	+	0	0	0	2	0	0
circRNA11415	363	chrNC_030827.1	23542726	23552536	+	0	0	0	2	0	0
circRNA11416	305	chrNC_030827.1	23960092	23960978	+	0	0	0	1	0	0
circRNA11417	388	chrNC_030827.1	31288659	31299685	+	0	0	0	3	0	0
circRNA11418	516	chrNC_030827.1	32744019	32757263	+	0	0	0	7	2	3
circRNA11419	1308	chrNC_030827.1	33676221	33689116	+	0	0	0	2	1	2
circRNA1142	870	chrNC_030808.1	134679232	134713425	+	2	0	0	0	0	0
circRNA11420	390	chrNC_030827.1	37160527	37161519	-	0	0	0	1	0	0
circRNA11421	705	chrNC_030827.1	37193711	37197629	-	0	0	0	4	6	0
circRNA11422	309	chrNC_030827.1	37254006	37256746	-	0	0	0	1	0	0
circRNA11423	338	chrNC_030827.1	38087625	38092309	+	0	0	0	1	0	0
circRNA11424	214	chrNC_030827.1	39355783	39428384	-	0	0	0	1	0	5
circRNA11425	167	chrNC_030827.1	40921319	40921485	-	0	0	0	1	0	0
circRNA11426	2048	chrNC_030827.1	41197830	41222399	+	0	0	0	2	0	0
circRNA11427	357	chrNC_030827.1	41213306	41214354	+	0	0	0	1	0	0
circRNA11428	493	chrNC_030827.1	41919430	41921860	-	0	0	0	4	0	0
circRNA11429	1154	chrNC_030827.1	41996234	42032701	+	0	0	0	2	0	0
circRNA1143	1343	chrNC_030808.1	134679232	134731778	+	14	5	4	3	11	0
circRNA11430	1650	chrNC_030827.1	56290402	56329057	+	0	0	0	2	0	0
circRNA11431	324	chrNC_030827.1	58364821	58371671	+	0	0	0	1	0	0
circRNA11432	586	chrNC_030827.1	58432584	58450448	-	0	0	0	1	0	0
circRNA11433	648	chrNC_030827.1	58673522	58682645	-	0	0	0	5	0	0
circRNA11434	239	chrNC_030827.1	58699042	58702480	-	0	0	0	3	0	0
circRNA11435	1268	chrNC_030827.1	58768828	58792931	-	0	0	0	3	0	0
circRNA11436	344	chrNC_030827.1	71423769	71425427	-	0	0	0	3	0	0
circRNA11437	266	chrNC_030827.1	71703529	71710372	-	0	0	0	4	0	0
circRNA11438	849	chrNW_017189531.1	22069	22917	-	0	0	0	2	0	2
circRNA11439	501	chrNC_030825.1	2684569	2705286	+	0	0	0	3	1	0
circRNA1144	434	chrNC_030808.1	134690831	134700145	+	5	0	18	1	14	5
circRNA11440	448	chrNC_030825.1	3539250	3545195	-	0	0	0	1	1	0
circRNA11441	279	chrNC_030825.1	3872732	3938392	-	0	0	0	1	0	0
circRNA11442	286	chrNC_030825.1	9706652	9709561	+	0	0	0	5	0	0
circRNA11443	321	chrNC_030825.1	10713256	10875555	+	0	0	0	1	2	3
circRNA11444	326	chrNC_030825.1	10875347	10960751	+	0	0	0	1	0	0
circRNA11445	270	chrNC_030825.1	10960635	11054347	+	0	0	0	2	0	0
circRNA11446	578	chrNC_030825.1	11389437	11435362	+	0	0	0	1	0	0
circRNA11447	417	chrNC_030825.1	11806095	11808660	-	0	0	0	1	0	0
circRNA11448	419	chrNC_030825.1	13018437	13027048	+	0	0	0	1	0	0
circRNA11449	320	chrNC_030825.1	14329941	14335658	-	0	0	0	1	0	0
circRNA1145	818	chrNC_030808.1	134690831	134722926	+	3	0	2	4	5	0
circRNA11450	1492	chrNC_030825.1	21282709	21424035	-	0	0	0	1	2	0
circRNA11451	268	chrNC_030825.1	21568941	21573040	+	0	0	0	1	3	0
circRNA11452	647	chrNC_030825.1	23110485	23115351	+	0	0	0	1	0	0
circRNA11453	224	chrNC_030825.1	23586820	23596837	+	0	0	0	8	0	0
circRNA11454	1616	chrNC_030825.1	25130412	25147126	+	0	0	0	1	0	0
circRNA11455	430	chrNC_030825.1	25613546	25622131	+	0	0	0	1	0	0
circRNA11456	771	chrNC_030825.1	34010046	34019290	-	0	0	0	1	0	0
circRNA11457	583	chrNC_030825.1	34013702	34019290	-	0	0	0	1	0	0
circRNA11458	1995	chrNC_030825.1	36813005	36845990	+	0	0	0	1	0	0
circRNA11459	833	chrNC_030825.1	37418977	37447001	+	0	0	0	2	0	2
circRNA1146	1221	chrNC_030808.1	134690831	134731778	+	5	7	13	6	0	8
circRNA11460	476	chrNC_030825.1	38189147	38213326	+	0	0	0	2	0	0
circRNA11461	1100	chrNC_030825.1	40500537	40525365	+	0	0	0	2	0	0
circRNA11462	277	chrNC_030825.1	41419198	41420916	+	0	0	0	1	0	0
circRNA11463	392	chrNC_030825.1	44114399	44118452	+	0	0	0	1	0	0
circRNA11464	1070	chrNC_030825.1	45672223	45693782	+	0	0	0	1	0	1
circRNA11465	460	chrNC_030825.1	45895218	45899676	+	0	0	0	1	4	0
circRNA11466	409	chrNC_030825.1	47582813	47587022	+	0	0	0	3	0	0
circRNA11467	913	chrNC_030825.1	47582813	47595283	+	0	0	0	2	0	0
circRNA11468	217	chrNC_030825.1	48306191	48309601	-	0	0	0	1	0	2
circRNA11469	2272	chrNC_030825.1	49058351	49070634	+	0	0	0	2	0	0
circRNA1147	932	chrNC_030808.1	134700001	134731778	+	3	0	5	3	4	0
circRNA11470	250	chrNC_030825.1	49064786	49065139	+	0	0	0	2	0	0
circRNA11471	241	chrNC_030825.1	50541471	50543062	-	0	0	0	1	0	1
circRNA11472	255	chrNC_030825.1	50596933	50601120	-	0	0	0	1	0	0
circRNA11473	707	chrNC_030825.1	51372848	51381783	+	0	0	0	1	4	0
circRNA11474	1680	chrNC_030825.1	51372848	51396779	+	0	0	0	4	0	0
circRNA11475	508	chrNC_030825.1	51426106	51430019	-	0	0	0	2	1	0
circRNA11476	279	chrNC_030825.1	51719041	51719319	+	0	0	0	1	2	0
circRNA11477	251	chrNC_030825.1	52133287	52133639	+	0	0	0	1	0	0
circRNA11478	551	chrNC_030825.1	53021732	53024215	-	0	0	0	4	0	0
circRNA11479	331	chrNC_030825.1	55172038	55172648	-	0	0	0	1	1	0
circRNA1148	384	chrNC_030808.1	134707240	134722926	+	33	25	36	32	40	26
circRNA11480	511	chrNC_030825.1	55662669	55667583	+	0	0	0	3	0	0
circRNA11481	195	chrNC_030825.1	56290105	56290660	-	0	0	0	1	0	0
circRNA11482	381	chrNC_030825.1	56508955	56511952	+	0	0	0	2	0	0
circRNA11483	724	chrNC_030825.1	57036190	57037433	+	0	0	0	1	0	0
circRNA11484	212	chrNC_030825.1	57159543	57159876	+	0	0	0	1	0	0
circRNA11485	426	chrNC_030825.1	57160413	57164402	+	0	0	0	2	0	0
circRNA11486	290	chrNW_017189517.1	13686795	13688356	-	0	0	0	1	0	0
circRNA11487	411	chrNW_017189517.1	13782374	13784958	-	0	0	0	2	0	1
circRNA11488	554	chrNW_017189517.1	32897500	32913718	-	0	0	0	1	0	0
circRNA11489	490	chrNW_017189517.1	32904944	32913718	-	0	0	0	3	0	0
circRNA1149	787	chrNC_030808.1	134707240	134731778	+	89	85	111	77	83	102
circRNA11490	636	chrNW_017189517.1	32904944	32919286	-	0	0	0	1	1	0
circRNA11491	838	chrNW_017189517.1	32904944	32942779	-	0	0	0	1	0	0
circRNA11492	347	chrNW_017189517.1	33859311	33860538	+	0	0	0	1	0	0
circRNA11493	404	chrNW_017189517.1	36365908	36366311	+	0	0	0	3	0	0
circRNA11494	733	chrNW_017189517.1	36365908	36393284	+	0	0	0	2	0	0
circRNA11495	615	chrNW_017189517.1	36632475	36637966	-	0	0	0	2	0	0
circRNA11496	539	chrNW_017189517.1	45532142	45599101	-	0	0	0	1	0	0
circRNA11497	681	chrNW_017189517.1	45712887	45735297	-	0	0	0	2	0	0
circRNA11498	479	chrNC_030809.1	2463876	2468134	-	0	0	0	3	0	0
circRNA11499	491	chrNC_030809.1	3175622	3192850	+	0	0	0	1	1	0
circRNA115	913	chrNC_030829.1	59305107	59345009	-	1	0	0	0	0	0
circRNA1150	403	chrNC_030808.1	134730322	134731778	+	10	9	0	7	13	5
circRNA11500	1434	chrNC_030809.1	4163558	4201955	-	0	0	0	1	0	0
circRNA11501	623	chrNC_030809.1	4186204	4201955	-	0	0	0	1	0	0
circRNA11502	1687	chrNC_030809.1	4245888	4352309	-	0	0	0	1	0	0
circRNA11503	741	chrNC_030809.1	4271866	4352309	-	0	0	0	2	0	0
circRNA11504	205	chrNC_030809.1	4352181	4389547	-	0	0	0	9	0	5
circRNA11505	661	chrNC_030809.1	6131674	6158140	+	0	0	0	1	0	0
circRNA11506	189	chrNC_030809.1	6156422	6158140	+	0	0	0	1	0	0
[truncated: 14,176 more rows]
