# Supplementary material for: Genome-wide analysis of circular RNAs in goat skin fibroblast cells in response to Orf virus infection
Source: PeerJ. 2019 Jan 22;7:e6267. doi: 10.7717/peerj.6267 (PMC6346991; doi:10.7717/peerj.6267)
Supplement: Table S3 [file peerj-07-6267-s005.xlsx]

## Sheet: Sheet1
Table S3: The mapping overview of miRNA sequencing
3ADT&length filter: reads removed due to 3ADT not found and length with <18 nt and >25 nt were removed(for plants); length with<18 and >26 were remove(for animals)
Junk reads:Junk: >=2N, >=7A, >=8C, >=6G, >=7T, >=10Dimer, >=6Trimer, or >=5Tetramer
Rfam:Collection of many common non-coding RNA families except micro RNA; http://rfam.janelia.org
Repeats:Prototypic sequences representing repetitive DNA from different eukaryotic species; http://www.girinst.org/repbase.
Notes:valid reads may not be equal to raw reads - 3ADT&length filter - Junk reads ï¿½C mRNA ï¿½C Rfam - Repeats, because there are overlapped sequences between mRNAï¿½ï¿½Rfam and Repeats, details please refer to _comp_others.txt in fold 2_MappedData.
mRNA_Database:YES
		GSF_1				GSF_2				GSF_3				OV_1				OV_2				OV_3
lib	type	Total	% of Total	uniq	% of uniq	Total	% of Total	uniq	% of uniq	Total	% of Total	uniq	% of uniq	Total	% of Total	uniq	% of uniq	Total	% of Total	uniq	% of uniq	Total	% of Total	uniq	% of uniq
Raw reads	NA	23565751	100	788883	100	12315365	100	582797	100	16777663	100	727565	100	21256324	100	835183	100	23770240	100	1328175	100	13352369	100	1180241	100
3ADT&length filter	Sequence type	4713849	20	444838	56.39	1765976	14.34	411991	70.69	4416950	26.33	464211	63.8	4657604	21.91	501141	60	5556186	23.37	750568	56.51	4122445	30.87	954667	80.89
Junk reads	Sequence type	53454	0.23	7736	0.98	23806	0.19	3927	0.67	28456	0.17	5446	0.75	46460	0.22	10926	1.31	53393	0.22	13321	1	25381	0.19	7132	0.6
Rfam	RNA class	358582	1.52	6338	0.8	195735	1.59	3960	0.68	237336	1.41	4760	0.65	338537	1.59	5722	0.69	408254	1.72	6606	0.5	209053	1.57	4316	0.37
mRNA	RNA class	3707880	15.73	7291	0.92	3234023	26.26	4211	0.72	2631764	15.69	5501	0.76	3215314	15.13	5733	0.69	3713820	15.62	7046	0.53	1382106	10.35	4316	0.37
Repeats	RNA class	70623	0.3	955	0.12	58198	0.47	753	0.13	62791	0.37	787	0.11	67610	0.32	898	0.11	78520	0.33	1014	0.08	33373	0.25	728	0.06
rRNA	RNA class	147855	0.63	1604	0.01	82626	0.67	903	0.01	92965	0.55	1143	0.01	105344	0.5	1168	0.01	145639	0.61	1572	0.01	62670	0.47	857	0.01
tRNA	RNA class	92821	0.39	2121	0.01	53783	0.44	1439	0.01	63168	0.38	1610	0.01	76866	0.36	1970	0.01	82284	0.35	2088	0.01	42681	0.32	1464	0.01
snoRNA	RNA class	51939	0.22	1472	0.01	27624	0.22	949	0.01	35883	0.21	1140	0.01	38526	0.18	1389	0.01	49403	0.21	1546	0.01	22245	0.17	1070	0.01
snRNA	RNA class	15077	0.06	363	0	8055	0.07	185	0	9660	0.06	246	0	10014	0.05	299	0	13021	0.05	365	0	7031	0.05	213	0
other Rfam RNA	RNA class	50890	0.22	778	0	23647	0.19	484	0	35660	0.21	621	0	107787	0.51	896	0	117907	0.5	1035	0	74426	0.56	712	0.01
valid reads	Sequence type	14864971	63.08	323649	41.03	7163123	58.16	159273	27.33	9544468	56.89	248333	34.13	13086315	61.56	312360	37.4	14161877	59.58	551536	41.53	7670162	57.44	210393	17.83
