# Supplementary material for: Genome-wide analysis of circular RNAs in goat skin fibroblast cells in response to Orf virus infection
Source: PeerJ. 2019 Jan 22;7:e6267. doi: 10.7717/peerj.6267 (PMC6346991; doi:10.7717/peerj.6267)
Supplement: Table S7 [file peerj-07-6267-s009.xlsx]

## Sheet: Sheet1
Table S7: GO enrichement analysis for host genes of differentially expressed circRNAs
GO_ID	GO_Term	GO_Function	GO_class	m	n	M	N	pvalue
GO:0005578	proteinaceous extracellular matrix	cellular_component	5	5	90	31	4725	0.000257693
GO:0014704	intercalated disc	cellular_component	6	3	90	8	4725	0.000349305
GO:0050727	regulation of inflammatory response	biological_process	7	3	90	11	4725	0.000987317
GO:0001518	voltage-gated sodium channel complex	cellular_component	7	2	90	3	4725	0.0010632
GO:0010669	epithelial structure maintenance	biological_process	7	2	90	3	4725	0.0010632
GO:0019228	neuronal action potential	biological_process	7	2	90	3	4725	0.0010632
GO:0001707	mesoderm formation	biological_process	10	3	90	12	4725	0.00129835
GO:0060078	regulation of postsynaptic membrane potential	biological_process	8	2	90	4	4725	0.00210002
GO:0019838	growth factor binding	molecular_function	5	2	90	5	4725	0.00345668
GO:0005248	voltage-gated sodium channel activity	molecular_function	11	2	90	5	4725	0.00345668
GO:0005886	plasma membrane	cellular_component	5	17	90	444	4725	0.00370366
GO:0030315	T-tubule	cellular_component	7	2	90	6	4725	0.00512089
GO:0038191	neuropilin binding	molecular_function	6	2	90	6	4725	0.00512089
GO:0030215	semaphorin receptor binding	molecular_function	6	2	90	6	4725	0.00512089
GO:0046676	negative regulation of insulin secretion	biological_process	11	2	90	6	4725	0.00512089
GO:0045499	chemorepellent activity	molecular_function	3	2	90	6	4725	0.00512089
GO:0005576	extracellular region	cellular_component	3	4	90	39	4725	0.0060864
GO:0030335	positive regulation of cell migration	biological_process	9	4	90	40	4725	0.00666578
GO:0051443	positive regulation of ubiquitin-protein transferase activity	biological_process	13	2	90	7	4725	0.00708069
GO:0007163	establishment or maintenance of cell polarity	biological_process	5	2	90	7	4725	0.00708069
GO:0086010	membrane depolarization during action potential	biological_process	7	2	90	7	4725	0.00708069
GO:0048843	negative regulation of axon extension involved in axon guidance	biological_process	6	2	90	7	4725	0.00708069
GO:0050919	negative chemotaxis	biological_process	6	2	90	9	4725	0.011841
GO:0048675	axon extension	biological_process	8	2	90	9	4725	0.011841
GO:0034765	regulation of ion transmembrane transport	biological_process	7	2	90	10	4725	0.0146192
GO:0071526	semaphorin-plexin signaling pathway	biological_process	8	2	90	10	4725	0.0146192
GO:0005178	integrin binding	molecular_function	6	3	90	28	4725	0.0155203
GO:0035725	sodium ion transmembrane transport	biological_process	7	2	90	11	4725	0.0176485
GO:0009897	external side of plasma membrane	cellular_component	6	3	90	30	4725	0.0187175
GO:0003065	positive regulation of heart rate by epinephrine	biological_process	12	1	90	1	4725	0.0190476
GO:0005542	folic acid binding	molecular_function	5	1	90	1	4725	0.0190476
GO:0000217	DNA secondary structure binding	molecular_function	8	1	90	1	4725	0.0190476
GO:0061181	regulation of chondrocyte development	biological_process	9	1	90	1	4725	0.0190476
GO:1902548	negative regulation of cellular response to vascular endothelial growth factor stimulus	biological_process	10	1	90	1	4725	0.0190476
GO:0008627	intrinsic apoptotic signaling pathway in response to osmotic stress	biological_process	9	1	90	1	4725	0.0190476
GO:1902203	negative regulation of hepatocyte growth factor receptor signaling pathway	biological_process	12	1	90	1	4725	0.0190476
GO:0032765	positive regulation of mast cell cytokine production	biological_process	10	1	90	1	4725	0.0190476
GO:0002009	morphogenesis of an epithelium	biological_process	6	1	90	1	4725	0.0190476
GO:0005597	collagen type XVI trimer	cellular_component	5	1	90	1	4725	0.0190476
GO:0043584	nose development	biological_process	8	1	90	1	4725	0.0190476
GO:0051908	double-stranded DNA 5'-3' exodeoxyribonuclease activity	molecular_function	11	1	90	1	4725	0.0190476
GO:0060907	positive regulation of macrophage cytokine production	biological_process	10	1	90	1	4725	0.0190476
GO:0002114	interleukin-33 receptor activity	molecular_function	7	1	90	1	4725	0.0190476
GO:0034695	response to prostaglandin E	biological_process	7	1	90	1	4725	0.0190476
GO:0033627	cell adhesion mediated by integrin	biological_process	5	1	90	1	4725	0.0190476
GO:0032059	bleb	cellular_component	6	1	90	1	4725	0.0190476
GO:0001642	group III metabotropic glutamate receptor activity	molecular_function	8	1	90	1	4725	0.0190476
GO:0030167	proteoglycan catabolic process	biological_process	8	1	90	1	4725	0.0190476
GO:0070123	transforming growth factor beta receptor activity, type III	molecular_function	11	1	90	1	4725	0.0190476
GO:2000253	positive regulation of feeding behavior	biological_process	6	1	90	1	4725	0.0190476
GO:0032354	response to follicle-stimulating hormone	biological_process	7	1	90	1	4725	0.0190476
GO:0032423	regulation of mismatch repair	biological_process	11	1	90	1	4725	0.0190476
GO:0044089	positive regulation of cellular component biogenesis	biological_process	6	1	90	1	4725	0.0190476
GO:2000108	positive regulation of leukocyte apoptotic process	biological_process	11	1	90	1	4725	0.0190476
GO:0071376	cellular response to corticotropin-releasing hormone stimulus	biological_process	9	1	90	1	4725	0.0190476
GO:0003413	chondrocyte differentiation involved in endochondral bone morphogenesis	biological_process	8	1	90	1	4725	0.0190476
GO:1901509	regulation of endothelial tube morphogenesis	biological_process	10	1	90	1	4725	0.0190476
GO:0036326	VEGF-A-activated receptor activity	molecular_function	11	1	90	1	4725	0.0190476
GO:0043303	mast cell degranulation	biological_process	9	1	90	1	4725	0.0190476
GO:0038100	nodal binding	molecular_function	5	1	90	1	4725	0.0190476
GO:0051656	establishment of organelle localization	biological_process	5	1	90	1	4725	0.0190476
GO:0010269	response to selenium ion	biological_process	6	1	90	1	4725	0.0190476
GO:0008480	sarcosine dehydrogenase activity	molecular_function	7	1	90	1	4725	0.0190476
GO:0035934	corticosterone secretion	biological_process	13	1	90	1	4725	0.0190476
GO:0035194	posttranscriptional gene silencing by RNA	biological_process	10	1	90	1	4725	0.0190476
GO:0035574	histone H4-K20 demethylation	biological_process	12	1	90	1	4725	0.0190476
GO:0036327	VEGF-B-activated receptor activity	molecular_function	11	1	90	1	4725	0.0190476
GO:1901164	negative regulation of trophoblast cell migration	biological_process	11	1	90	1	4725	0.0190476
GO:0002035	brain renin-angiotensin system	biological_process	14	1	90	1	4725	0.0190476
GO:0033270	paranode region of axon	cellular_component	9	1	90	1	4725	0.0190476
GO:0032053	ciliary basal body organization	biological_process	8	1	90	1	4725	0.0190476
GO:0038097	positive regulation of mast cell activation by Fc-epsilon receptor signaling pathway	biological_process	8	1	90	1	4725	0.0190476
GO:0036332	placental growth factor-activated receptor activity	molecular_function	10	1	90	1	4725	0.0190476
GO:0004711	ribosomal protein S6 kinase activity	molecular_function	9	1	90	1	4725	0.0190476
GO:0043194	axon initial segment	cellular_component	9	1	90	1	4725	0.0190476
GO:0048255	mRNA stabilization	biological_process	11	1	90	1	4725	0.0190476
GO:0035575	histone demethylase activity (H4-K20 specific)	molecular_function	6	1	90	1	4725	0.0190476
GO:0085032	modulation by symbiont of host I-kappaB kinase/NF-kappaB cascade	biological_process	10	1	90	1	4725	0.0190476
GO:0042426	choline catabolic process	biological_process	9	1	90	1	4725	0.0190476
GO:0046321	positive regulation of fatty acid oxidation	biological_process	12	1	90	1	4725	0.0190476
GO:0030262	apoptotic nuclear changes	biological_process	10	1	90	1	4725	0.0190476
GO:1900020	positive regulation of protein kinase C activity	biological_process	13	1	90	1	4725	0.0190476
GO:0034699	response to luteinizing hormone	biological_process	7	1	90	1	4725	0.0190476
GO:0010827	regulation of glucose transport	biological_process	9	1	90	1	4725	0.0190476
GO:0050659	N-acetylgalactosamine 4-sulfate 6-O-sulfotransferase activity	molecular_function	7	1	90	1	4725	0.0190476
GO:0007196	adenylate cyclase-inhibiting G-protein coupled glutamate receptor signaling pathway	biological_process	12	1	90	1	4725	0.0190476
GO:0002826	negative regulation of T-helper 1 type immune response	biological_process	9	1	90	1	4725	0.0190476
GO:0031870	thromboxane A2 receptor binding	molecular_function	8	1	90	1	4725	0.0190476
GO:0035810	positive regulation of urine volume	biological_process	8	1	90	1	4725	0.0190476
GO:0002113	interleukin-33 binding	molecular_function	6	1	90	1	4725	0.0190476
GO:0090197	positive regulation of chemokine secretion	biological_process	10	1	90	1	4725	0.0190476
GO:0035196	production of miRNAs involved in gene silencing by miRNA	biological_process	12	1	90	1	4725	0.0190476
GO:0030595	leukocyte chemotaxis	biological_process	5	1	90	1	4725	0.0190476
GO:0045145	single-stranded DNA 5'-3' exodeoxyribonuclease activity	molecular_function	11	1	90	1	4725	0.0190476
GO:0021988	olfactory lobe development	biological_process	12	1	90	1	4725	0.0190476
GO:0002682	regulation of immune system process	biological_process	4	1	90	1	4725	0.0190476
GO:0002158	osteoclast proliferation	biological_process	6	1	90	1	4725	0.0190476
GO:1901383	negative regulation of chorionic trophoblast cell proliferation	biological_process	6	1	90	1	4725	0.0190476
GO:0055106	ubiquitin-protein transferase regulator activity	molecular_function	5	1	90	1	4725	0.0190476
GO:0007565	female pregnancy	biological_process	5	1	90	1	4725	0.0190476
GO:0050656	3'-phosphoadenosine 5'-phosphosulfate binding	molecular_function	9	1	90	1	4725	0.0190476
GO:2001113	negative regulation of cellular response to hepatocyte growth factor stimulus	biological_process	10	1	90	1	4725	0.0190476
GO:0002021	response to dietary excess	biological_process	5	1	90	1	4725	0.0190476
GO:0044320	cellular response to leptin stimulus	biological_process	8	1	90	1	4725	0.0190476
GO:0001681	sialate O-acetylesterase activity	molecular_function	9	1	90	1	4725	0.0190476
GO:0015993	molecular hydrogen transport	biological_process	6	1	90	1	4725	0.0190476
GO:0019319	hexose biosynthetic process	biological_process	8	1	90	1	4725	0.0190476
GO:0033688	regulation of osteoblast proliferation	biological_process	6	1	90	1	4725	0.0190476
GO:0009444	pyruvate oxidation	biological_process	10	1	90	1	4725	0.0190476
GO:0000389	mRNA 3'-splice site recognition	biological_process	14	1	90	1	4725	0.0190476
GO:0002455	humoral immune response mediated by circulating immunoglobulin	biological_process	9	1	90	1	4725	0.0190476
GO:0048256	flap endonuclease activity	molecular_function	9	1	90	1	4725	0.0190476
GO:0060005	vestibular reflex	biological_process	6	1	90	1	4725	0.0190476
GO:0036323	vascular endothelial growth factor receptor-1 signaling pathway	biological_process	11	1	90	1	4725	0.0190476
GO:0047988	hydroxyacid-oxoacid transhydrogenase activity	molecular_function	6	1	90	1	4725	0.0190476
GO:0045333	cellular respiration	biological_process	7	1	90	1	4725	0.0190476
GO:1903208	negative regulation of hydrogen peroxide-induced neuron death	biological_process	10	1	90	1	4725	0.0190476
GO:0038172	interleukin-33-mediated signaling pathway	biological_process	9	1	90	1	4725	0.0190476
GO:0031572	G2 DNA damage checkpoint	biological_process	10	2	90	13	4725	0.0244193
GO:0043124	negative regulation of I-kappaB kinase/NF-kappaB signaling	biological_process	10	2	90	13	4725	0.0244193
GO:0001755	neural crest cell migration	biological_process	9	2	90	13	4725	0.0244193
GO:0031625	ubiquitin protein ligase binding	molecular_function	7	5	90	89	4725	0.0265795
GO:0008237	metallopeptidase activity	molecular_function	7	2	90	14	4725	0.0281409
GO:0030154	cell differentiation	biological_process	6	4	90	61	4725	0.0281648
GO:0004222	metalloendopeptidase activity	molecular_function	8	3	90	35	4725	0.0281928
GO:0031965	nuclear membrane	cellular_component	12	4	90	66	4725	0.0362261
GO:0017157	regulation of exocytosis	biological_process	7	1	90	2	4725	0.0377364
GO:0016941	natriuretic peptide receptor activity	molecular_function	6	1	90	2	4725	0.0377364
GO:0010659	cardiac muscle cell apoptotic process	biological_process	11	1	90	2	4725	0.0377364
GO:0048179	activin receptor complex	cellular_component	8	1	90	2	4725	0.0377364
GO:0016361	activin receptor activity, type I	molecular_function	11	1	90	2	4725	0.0377364
GO:0030853	negative regulation of granulocyte differentiation	biological_process	11	1	90	2	4725	0.0377364
GO:0043252	sodium-independent organic anion transport	biological_process	8	1	90	2	4725	0.0377364
GO:0001223	transcription coactivator binding	molecular_function	7	1	90	2	4725	0.0377364
GO:0000989	transcription factor activity, transcription factor binding	molecular_function	4	1	90	2	4725	0.0377364
GO:0071773	cellular response to BMP stimulus	biological_process	8	1	90	2	4725	0.0377364
GO:0060294	cilium movement involved in cell motility	biological_process	8	1	90	2	4725	0.0377364
GO:0051782	negative regulation of cell division	biological_process	7	1	90	2	4725	0.0377364
GO:0030016	myofibril	cellular_component	10	1	90	2	4725	0.0377364
GO:0019915	lipid storage	biological_process	6	1	90	2	4725	0.0377364
GO:0031017	exocrine pancreas development	biological_process	8	1	90	2	4725	0.0377364
GO:0015347	sodium-independent organic anion transmembrane transporter activity	molecular_function	7	1	90	2	4725	0.0377364
GO:0031507	heterochromatin assembly	biological_process	12	1	90	2	4725	0.0377364
GO:0010828	positive regulation of glucose transport	biological_process	10	1	90	2	4725	0.0377364
GO:0007223	Wnt signaling pathway, calcium modulating pathway	biological_process	10	1	90	2	4725	0.0377364
GO:0001957	intramembranous ossification	biological_process	7	1	90	2	4725	0.0377364
GO:0046923	ER retention sequence binding	molecular_function	7	1	90	2	4725	0.0377364
GO:0035279	mRNA cleavage involved in gene silencing by miRNA	biological_process	12	1	90	2	4725	0.0377364
GO:0019209	kinase activator activity	molecular_function	5	1	90	2	4725	0.0377364
GO:0051864	histone demethylase activity (H3-K36 specific)	molecular_function	7	1	90	2	4725	0.0377364
GO:0071322	cellular response to carbohydrate stimulus	biological_process	7	1	90	2	4725	0.0377364
GO:0000076	DNA replication checkpoint	biological_process	9	1	90	2	4725	0.0377364
GO:0061357	positive regulation of Wnt protein secretion	biological_process	10	1	90	2	4725	0.0377364
GO:0002755	MyD88-dependent toll-like receptor signaling pathway	biological_process	9	1	90	2	4725	0.0377364
GO:0009378	four-way junction helicase activity	molecular_function	11	1	90	2	4725	0.0377364
GO:0004383	guanylate cyclase activity	molecular_function	5	1	90	2	4725	0.0377364
GO:0038084	vascular endothelial growth factor signaling pathway	biological_process	10	1	90	2	4725	0.0377364
GO:1903561	extracellular vesicle	cellular_component	6	1	90	2	4725	0.0377364
GO:0042629	mast cell granule	cellular_component	12	1	90	2	4725	0.0377364
GO:0035726	common myeloid progenitor cell proliferation	biological_process	5	1	90	2	4725	0.0377364
GO:0051984	positive regulation of chromosome segregation	biological_process	7	1	90	2	4725	0.0377364
GO:0071870	cellular response to catecholamine stimulus	biological_process	8	1	90	2	4725	0.0377364
GO:0032689	negative regulation of interferon-gamma production	biological_process	8	1	90	2	4725	0.0377364
GO:0019227	neuronal action potential propagation	biological_process	7	1	90	2	4725	0.0377364
GO:0034673	inhibin-betaglycan-ActRII complex	cellular_component	7	1	90	2	4725	0.0377364
GO:0010942	positive regulation of cell death	biological_process	7	1	90	2	4725	0.0377364
GO:0070602	regulation of centromeric sister chromatid cohesion	biological_process	8	1	90	2	4725	0.0377364
GO:0090102	cochlea development	biological_process	11	1	90	2	4725	0.0377364
GO:0036066	protein O-linked fucosylation	biological_process	10	1	90	2	4725	0.0377364
GO:0050884	neuromuscular process controlling posture	biological_process	8	1	90	2	4725	0.0377364
GO:0045835	negative regulation of meiotic nuclear division	biological_process	7	1	90	2	4725	0.0377364
GO:0022038	corpus callosum development	biological_process	12	1	90	2	4725	0.0377364
GO:0006182	cGMP biosynthetic process	biological_process	12	1	90	2	4725	0.0377364
GO:0005261	cation channel activity	molecular_function	9	1	90	2	4725	0.0377364
GO:0048014	Tie signaling pathway	biological_process	10	1	90	2	4725	0.0377364
GO:0036128	CatSper complex	cellular_component	8	1	90	2	4725	0.0377364
GO:0007159	leukocyte cell-cell adhesion	biological_process	7	1	90	2	4725	0.0377364
GO:0033314	mitotic DNA replication checkpoint	biological_process	10	1	90	2	4725	0.0377364
GO:0060047	heart contraction	biological_process	8	1	90	2	4725	0.0377364
GO:0005096	GTPase activator activity	molecular_function	5	5	90	99	4725	0.039551
GO:0005911	cell-cell junction	cellular_component	4	3	90	40	4725	0.0397763
GO:0006508	proteolysis	biological_process	6	4	90	69	4725	0.0416413
GO:0005615	extracellular space	cellular_component	5	6	90	135	4725	0.0428214
GO:0050660	flavin adenine dinucleotide binding	molecular_function	6	2	90	18	4725	0.0450506
GO:0043524	negative regulation of neuron apoptotic process	biological_process	11	2	90	18	4725	0.0450506
GO:0005884	actin filament	cellular_component	11	2	90	18	4725	0.0450506
GO:0005925	focal adhesion	cellular_component	6	6	90	139	4725	0.0482239
GO:0005694	chromosome	cellular_component	9	2	90	19	4725	0.0497398
GO:0005788	endoplasmic reticulum lumen	cellular_component	11	2	90	19	4725	0.0497398
GO:0042562	hormone binding	molecular_function	4	1	90	3	4725	0.056073
GO:0033268	node of Ranvier	cellular_component	9	1	90	3	4725	0.056073
GO:0071557	histone H3-K27 demethylation	biological_process	12	1	90	3	4725	0.056073
GO:0030001	metal ion transport	biological_process	7	1	90	3	4725	0.056073
GO:0015026	coreceptor activity	molecular_function	5	1	90	3	4725	0.056073
GO:0021532	neural tube patterning	biological_process	8	1	90	3	4725	0.056073
GO:0004791	thioredoxin-disulfide reductase activity	molecular_function	7	1	90	3	4725	0.056073
GO:0005677	chromatin silencing complex	cellular_component	11	1	90	3	4725	0.056073
GO:0002548	monocyte chemotaxis	biological_process	6	1	90	3	4725	0.056073
GO:0005849	mRNA cleavage factor complex	cellular_component	13	1	90	3	4725	0.056073
GO:0045910	negative regulation of DNA recombination	biological_process	11	1	90	3	4725	0.056073
GO:0038092	nodal signaling pathway	biological_process	11	1	90	3	4725	0.056073
GO:0004415	hyalurononglucosaminidase activity	molecular_function	8	1	90	3	4725	0.056073
GO:0043140	ATP-dependent 3'-5' DNA helicase activity	molecular_function	12	1	90	3	4725	0.056073
GO:0043032	positive regulation of macrophage activation	biological_process	8	1	90	3	4725	0.056073
GO:0030274	LIM domain binding	molecular_function	6	1	90	3	4725	0.056073
GO:0032754	positive regulation of interleukin-5 production	biological_process	8	1	90	3	4725	0.056073
GO:0010997	anaphase-promoting complex binding	molecular_function	6	1	90	3	4725	0.056073
GO:0045744	negative regulation of G-protein coupled receptor protein signaling pathway	biological_process	10	1	90	3	4725	0.056073
GO:1903690	negative regulation of wound healing, spreading of epidermal cells	biological_process	11	1	90	3	4725	0.056073
GO:0005684	U2-type spliceosomal complex	cellular_component	9	1	90	3	4725	0.056073
GO:1900625	positive regulation of monocyte aggregation	biological_process	8	1	90	3	4725	0.056073
GO:0035999	tetrahydrofolate interconversion	biological_process	9	1	90	3	4725	0.056073
GO:0072757	cellular response to camptothecin	biological_process	8	1	90	3	4725	0.056073
GO:0009101	glycoprotein biosynthetic process	biological_process	7	1	90	3	4725	0.056073
GO:0051271	negative regulation of cellular component movement	biological_process	7	1	90	3	4725	0.056073
GO:0090244	Wnt signaling pathway involved in somitogenesis	biological_process	9	1	90	3	4725	0.056073
GO:0031465	Cul4B-RING E3 ubiquitin ligase complex	cellular_component	10	1	90	3	4725	0.056073
GO:0030854	positive regulation of granulocyte differentiation	biological_process	11	1	90	3	4725	0.056073
GO:0050930	induction of positive chemotaxis	biological_process	7	1	90	3	4725	0.056073
GO:0033622	integrin activation	biological_process	8	1	90	3	4725	0.056073
GO:0030676	Rac guanyl-nucleotide exchange factor activity	molecular_function	6	1	90	3	4725	0.056073
GO:0035414	negative regulation of catenin import into nucleus	biological_process	7	1	90	3	4725	0.056073
GO:0097228	sperm principal piece	cellular_component	9	1	90	3	4725	0.056073
GO:0035412	regulation of catenin import into nucleus	biological_process	10	1	90	3	4725	0.056073
GO:0070544	histone H3-K36 demethylation	biological_process	12	1	90	3	4725	0.056073
GO:0010863	positive regulation of phospholipase C activity	biological_process	9	1	90	3	4725	0.056073
GO:0048752	semicircular canal morphogenesis	biological_process	11	1	90	3	4725	0.056073
GO:0036310	annealing helicase activity	molecular_function	9	1	90	3	4725	0.056073
GO:0043570	maintenance of DNA repeat elements	biological_process	9	1	90	3	4725	0.056073
GO:0004908	interleukin-1 receptor activity	molecular_function	7	1	90	3	4725	0.056073
GO:0071558	histone demethylase activity (H3-K27 specific)	molecular_function	6	1	90	3	4725	0.056073
GO:0043297	apical junction assembly	biological_process	8	1	90	3	4725	0.056073
GO:0031526	brush border membrane	cellular_component	8	1	90	3	4725	0.056073
GO:0035455	response to interferon-alpha	biological_process	7	1	90	3	4725	0.056073
GO:0032508	DNA duplex unwinding	biological_process	11	2	90	21	4725	0.059614
GO:0003779	actin binding	molecular_function	6	4	90	80	4725	0.0652136
GO:0030018	Z disc	cellular_component	13	2	90	23	4725	0.0700977
GO:0001725	stress fiber	cellular_component	12	2	90	23	4725	0.0700977
GO:0032050	clathrin heavy chain binding	molecular_function	6	1	90	4	4725	0.074064
GO:0000733	DNA strand renaturation	biological_process	9	1	90	4	4725	0.074064
GO:0006139	nucleobase-containing compound metabolic process	biological_process	6	1	90	4	4725	0.074064
GO:0072711	cellular response to hydroxyurea	biological_process	7	1	90	4	4725	0.074064
GO:0070613	regulation of protein processing	biological_process	8	1	90	4	4725	0.074064
GO:0000405	bubble DNA binding	molecular_function	9	1	90	4	4725	0.074064
GO:0045595	regulation of cell differentiation	biological_process	7	1	90	4	4725	0.074064
GO:0030214	hyaluronan catabolic process	biological_process	9	1	90	4	4725	0.074064
GO:0010457	centriole-centriole cohesion	biological_process	9	1	90	4	4725	0.074064
GO:2000505	regulation of energy homeostasis	biological_process	7	1	90	4	4725	0.074064
GO:0005916	fascia adherens	cellular_component	6	1	90	4	4725	0.074064
GO:0045717	negative regulation of fatty acid biosynthetic process	biological_process	11	1	90	4	4725	0.074064
GO:0043034	costamere	cellular_component	11	1	90	4	4725	0.074064
GO:0034333	adherens junction assembly	biological_process	7	1	90	4	4725	0.074064
GO:0043405	regulation of MAP kinase activity	biological_process	12	1	90	4	4725	0.074064
GO:0009948	anterior/posterior axis specification	biological_process	9	1	90	4	4725	0.074064
GO:0031434	mitogen-activated protein kinase kinase binding	molecular_function	8	1	90	4	4725	0.074064
GO:0019985	translesion synthesis	biological_process	9	1	90	4	4725	0.074064
GO:0032454	histone demethylase activity (H3-K9 specific)	molecular_function	6	1	90	4	4725	0.074064
GO:0050729	positive regulation of inflammatory response	biological_process	8	1	90	4	4725	0.074064
GO:0006379	mRNA cleavage	biological_process	11	1	90	4	4725	0.074064
GO:0030534	adult behavior	biological_process	5	1	90	4	4725	0.074064
GO:0001736	establishment of planar polarity	biological_process	6	1	90	4	4725	0.074064
GO:0045294	alpha-catenin binding	molecular_function	5	1	90	4	4725	0.074064
GO:0035253	ciliary rootlet	cellular_component	11	1	90	4	4725	0.074064
GO:0030949	positive regulation of vascular endothelial growth factor receptor signaling pathway	biological_process	12	1	90	4	4725	0.074064
GO:0090136	epithelial cell-cell adhesion	biological_process	7	1	90	4	4725	0.074064
GO:0055010	ventricular cardiac muscle tissue morphogenesis	biological_process	12	1	90	4	4725	0.074064
GO:0046822	regulation of nucleocytoplasmic transport	biological_process	8	1	90	4	4725	0.074064
GO:0004879	RNA polymerase II transcription factor activity, ligand-activated sequence-specific DNA binding	molecular_function	6	1	90	4	4725	0.074064
GO:0009950	dorsal/ventral axis specification	biological_process	9	1	90	4	4725	0.074064
GO:0022617	extracellular matrix disassembly	biological_process	6	1	90	4	4725	0.074064
GO:0042445	hormone metabolic process	biological_process	4	1	90	4	4725	0.074064
GO:0003139	secondary heart field specification	biological_process	10	1	90	4	4725	0.074064
GO:0043235	receptor complex	cellular_component	5	2	90	24	4725	0.0755496
GO:0005930	axoneme	cellular_component	9	2	90	24	4725	0.0755496
GO:0005198	structural molecule activity	molecular_function	3	2	90	24	4725	0.0755496
GO:0043547	positive regulation of GTPase activity	biological_process	15	6	90	161	4725	0.0852794
GO:0016477	cell migration	biological_process	7	3	90	55	4725	0.0863966
GO:0007229	integrin-mediated signaling pathway	biological_process	8	2	90	26	4725	0.0868381
GO:0016023	cytoplasmic, membrane-bounded vesicle	cellular_component	10	2	90	26	4725	0.0868381
GO:0003674	molecular_function	molecular_function	2	5	90	126	4725	0.0911938
GO:0005575	cellular_component	cellular_component	2	5	90	126	4725	0.0911938
GO:0030071	regulation of mitotic metaphase/anaphase transition	biological_process	13	1	90	5	4725	0.0917158
GO:0000800	lateral element	cellular_component	14	1	90	5	4725	0.0917158
GO:0045180	basal cortex	cellular_component	11	1	90	5	4725	0.0917158
GO:0001917	photoreceptor inner segment	cellular_component	6	1	90	5	4725	0.0917158
GO:0045214	sarcomere organization	biological_process	9	1	90	5	4725	0.0917158
GO:0005664	nuclear origin of replication recognition complex	cellular_component	13	1	90	5	4725	0.0917158
GO:0000729	DNA double-strand break processing	biological_process	10	1	90	5	4725	0.0917158
GO:0051497	negative regulation of stress fiber assembly	biological_process	10	1	90	5	4725	0.0917158
GO:0051281	positive regulation of release of sequestered calcium ion into cytosol	biological_process	16	1	90	5	4725	0.0917158
GO:0005686	U2 snRNP	cellular_component	9	1	90	5	4725	0.0917158
GO:0030282	bone mineralization	biological_process	6	1	90	5	4725	0.0917158
GO:0021670	lateral ventricle development	biological_process	11	1	90	5	4725	0.0917158
GO:0003334	keratinocyte development	biological_process	10	1	90	5	4725	0.0917158
GO:0032743	positive regulation of interleukin-2 production	biological_process	8	1	90	5	4725	0.0917158
GO:0051880	G-quadruplex DNA binding	molecular_function	8	1	90	5	4725	0.0917158
GO:0042476	odontogenesis	biological_process	9	1	90	5	4725	0.0917158
GO:0043195	terminal bouton	cellular_component	9	1	90	5	4725	0.0917158
GO:0002162	dystroglycan binding	molecular_function	6	1	90	5	4725	0.0917158
GO:0032183	SUMO binding	molecular_function	6	1	90	5	4725	0.0917158
GO:0030665	clathrin-coated vesicle membrane	cellular_component	13	1	90	5	4725	0.0917158
GO:0042327	positive regulation of phosphorylation	biological_process	9	1	90	5	4725	0.0917158
GO:0010470	regulation of gastrulation	biological_process	8	1	90	5	4725	0.0917158
GO:0051966	regulation of synaptic transmission, glutamatergic	biological_process	10	1	90	5	4725	0.0917158
GO:0005114	type II transforming growth factor beta receptor binding	molecular_function	8	1	90	5	4725	0.0917158
GO:0060389	pathway-restricted SMAD protein phosphorylation	biological_process	9	1	90	5	4725	0.0917158
GO:0060317	cardiac epithelial to mesenchymal transition	biological_process	11	1	90	5	4725	0.0917158
GO:0050708	regulation of protein secretion	biological_process	7	1	90	5	4725	0.0917158
GO:0070507	regulation of microtubule cytoskeleton organization	biological_process	7	1	90	5	4725	0.0917158
GO:0008150	biological_process	biological_process	2	5	90	127	4725	0.0935701
GO:0008283	cell proliferation	biological_process	4	3	90	59	4725	0.101524
GO:0015629	actin cytoskeleton	cellular_component	10	3	90	59	4725	0.101524
GO:0051726	regulation of cell cycle	biological_process	6	2	90	29	4725	0.104634
GO:0043280	positive regulation of cysteine-type endopeptidase activity involved in apoptotic process	biological_process	13	1	90	6	4725	0.109035
GO:0035115	embryonic forelimb morphogenesis	biological_process	10	1	90	6	4725	0.109035
GO:0006402	mRNA catabolic process	biological_process	9	1	90	6	4725	0.109035
GO:0000079	regulation of cyclin-dependent protein serine/threonine kinase activity	biological_process	12	1	90	6	4725	0.109035
GO:0097009	energy homeostasis	biological_process	6	1	90	6	4725	0.109035
GO:0050840	extracellular matrix binding	molecular_function	4	1	90	6	4725	0.109035
GO:0030902	hindbrain development	biological_process	10	1	90	6	4725	0.109035
GO:0051492	regulation of stress fiber assembly	biological_process	9	1	90	6	4725	0.109035
GO:0033169	histone H3-K9 demethylation	biological_process	12	1	90	6	4725	0.109035
GO:0033365	protein localization to organelle	biological_process	7	1	90	6	4725	0.109035
GO:0060039	pericardium development	biological_process	9	1	90	6	4725	0.109035
GO:0035278	miRNA mediated inhibition of translation	biological_process	11	1	90	6	4725	0.109035
GO:0008589	regulation of smoothened signaling pathway	biological_process	9	1	90	6	4725	0.109035
GO:0035019	somatic stem cell population maintenance	biological_process	10	1	90	6	4725	0.109035
GO:0005540	hyaluronic acid binding	molecular_function	6	1	90	6	4725	0.109035
GO:0048661	positive regulation of smooth muscle cell proliferation	biological_process	6	1	90	6	4725	0.109035
GO:0006369	termination of RNA polymerase II transcription	biological_process	10	1	90	6	4725	0.109035
GO:0045190	isotype switching	biological_process	8	1	90	6	4725	0.109035
GO:0031464	Cul4A-RING E3 ubiquitin ligase complex	cellular_component	10	1	90	6	4725	0.109035
GO:0070578	RISC-loading complex	cellular_component	8	1	90	6	4725	0.109035
GO:0071004	U2-type prespliceosome	cellular_component	10	1	90	6	4725	0.109035
GO:0016446	somatic hypermutation of immunoglobulin genes	biological_process	6	1	90	6	4725	0.109035
GO:0060048	cardiac muscle contraction	biological_process	9	1	90	6	4725	0.109035
GO:0010717	regulation of epithelial to mesenchymal transition	biological_process	11	1	90	6	4725	0.109035
GO:0021772	olfactory bulb development	biological_process	13	1	90	6	4725	0.109035
GO:0090314	positive regulation of protein targeting to membrane	biological_process	9	1	90	6	4725	0.109035
GO:0021549	cerebellum development	biological_process	12	1	90	6	4725	0.109035
GO:0035116	embryonic hindlimb morphogenesis	biological_process	10	1	90	6	4725	0.109035
GO:0003382	epithelial cell morphogenesis	biological_process	9	1	90	6	4725	0.109035
GO:0043409	negative regulation of MAPK cascade	biological_process	11	1	90	6	4725	0.109035
GO:0070016	armadillo repeat domain binding	molecular_function	6	1	90	6	4725	0.109035
GO:0051233	spindle midzone	cellular_component	10	1	90	6	4725	0.109035
GO:0035068	micro-ribonucleoprotein complex	cellular_component	8	1	90	6	4725	0.109035
GO:0006342	chromatin silencing	biological_process	13	1	90	6	4725	0.109035
GO:0001556	oocyte maturation	biological_process	10	1	90	6	4725	0.109035
GO:0006357	regulation of transcription from RNA polymerase II promoter	biological_process	12	4	90	97	4725	0.112611
GO:0045668	negative regulation of osteoblast differentiation	biological_process	9	1	90	7	4725	0.126027
GO:0051402	neuron apoptotic process	biological_process	9	1	90	7	4725	0.126027
GO:0051895	negative regulation of focal adhesion assembly	biological_process	11	1	90	7	4725	0.126027
GO:0017147	Wnt-protein binding	molecular_function	5	1	90	7	4725	0.126027
GO:0051019	mitogen-activated protein kinase binding	molecular_function	8	1	90	7	4725	0.126027
GO:0070527	platelet aggregation	biological_process	7	1	90	7	4725	0.126027
GO:0030522	intracellular receptor signaling pathway	biological_process	7	1	90	7	4725	0.126027
GO:0035280	miRNA loading onto RISC involved in gene silencing by miRNA	biological_process	12	1	90	7	4725	0.126027
GO:0014065	phosphatidylinositol 3-kinase signaling	biological_process	10	1	90	7	4725	0.126027
GO:0009636	response to toxic substance	biological_process	5	1	90	7	4725	0.126027
GO:0004860	protein kinase inhibitor activity	molecular_function	6	1	90	7	4725	0.126027
GO:0070411	I-SMAD binding	molecular_function	6	1	90	7	4725	0.126027
GO:0060612	adipose tissue development	biological_process	8	1	90	7	4725	0.126027
GO:0050431	transforming growth factor beta binding	molecular_function	6	1	90	7	4725	0.126027
GO:0007095	mitotic G2 DNA damage checkpoint	biological_process	13	1	90	7	4725	0.126027
GO:0004712	protein serine/threonine/tyrosine kinase activity	molecular_function	8	1	90	7	4725	0.126027
GO:0030877	beta-catenin destruction complex	cellular_component	9	1	90	7	4725	0.126027
GO:0006270	DNA replication initiation	biological_process	11	1	90	7	4725	0.126027
GO:0032331	negative regulation of chondrocyte differentiation	biological_process	9	1	90	7	4725	0.126027
GO:0007049	cell cycle	biological_process	5	2	90	33	4725	0.129714
GO:0051894	positive regulation of focal adhesion assembly	biological_process	11	1	90	8	4725	0.142699
GO:0051262	protein tetramerization	biological_process	9	1	90	8	4725	0.142699
GO:0007628	adult walking behavior	biological_process	6	1	90	8	4725	0.142699
GO:0005125	cytokine activity	molecular_function	6	1	90	8	4725	0.142699
GO:0034394	protein localization to cell surface	biological_process	7	1	90	8	4725	0.142699
GO:0035869	ciliary transition zone	cellular_component	9	1	90	8	4725	0.142699
GO:0010800	positive regulation of peptidyl-threonine phosphorylation	biological_process	10	1	90	8	4725	0.142699
GO:0010165	response to X-ray	biological_process	7	1	90	8	4725	0.142699
GO:0034614	cellular response to reactive oxygen species	biological_process	7	1	90	8	4725	0.142699
GO:0098655	cation transmembrane transport	biological_process	7	1	90	8	4725	0.142699
GO:0008217	regulation of blood pressure	biological_process	8	1	90	8	4725	0.142699
GO:0042734	presynaptic membrane	cellular_component	8	1	90	8	4725	0.142699
GO:0032868	response to insulin	biological_process	7	1	90	8	4725	0.142699
GO:0042742	defense response to bacterium	biological_process	7	1	90	8	4725	0.142699
GO:0003727	single-stranded RNA binding	molecular_function	7	1	90	8	4725	0.142699
GO:0030099	myeloid cell differentiation	biological_process	7	1	90	8	4725	0.142699
GO:0004867	serine-type endopeptidase inhibitor activity	molecular_function	7	1	90	9	4725	0.159056
GO:0031297	replication fork processing	biological_process	12	1	90	9	4725	0.159056
GO:0016442	RISC complex	cellular_component	9	1	90	9	4725	0.159056
GO:0000976	transcription regulatory region sequence-specific DNA binding	molecular_function	9	1	90	9	4725	0.159056
GO:0009749	response to glucose	biological_process	9	1	90	9	4725	0.159056
GO:0045787	positive regulation of cell cycle	biological_process	6	1	90	9	4725	0.159056
GO:0001501	skeletal system development	biological_process	7	1	90	9	4725	0.159056
GO:0030141	secretory granule	cellular_component	11	1	90	9	4725	0.159056
GO:0042542	response to hydrogen peroxide	biological_process	7	1	90	9	4725	0.159056
GO:0003950	NAD+ ADP-ribosyltransferase activity	molecular_function	7	1	90	9	4725	0.159056
GO:0043552	positive regulation of phosphatidylinositol 3-kinase activity	biological_process	10	1	90	9	4725	0.159056
GO:0006298	mismatch repair	biological_process	10	1	90	9	4725	0.159056
GO:0035198	miRNA binding	molecular_function	7	1	90	9	4725	0.159056
GO:0004843	thiol-dependent ubiquitin-specific protease activity	molecular_function	9	2	90	39	4725	0.169528
GO:0031054	pre-miRNA processing	biological_process	13	1	90	10	4725	0.175105
GO:0045494	photoreceptor cell maintenance	biological_process	5	1	90	10	4725	0.175105
GO:0030901	midbrain development	biological_process	10	1	90	10	4725	0.175105
GO:0050714	positive regulation of protein secretion	biological_process	8	1	90	10	4725	0.175105
GO:0032147	activation of protein kinase activity	biological_process	12	1	90	10	4725	0.175105
GO:0030855	epithelial cell differentiation	biological_process	7	1	90	10	4725	0.175105
GO:0034613	cellular protein localization	biological_process	6	1	90	10	4725	0.175105
GO:0006513	protein monoubiquitination	biological_process	11	1	90	10	4725	0.175105
GO:0005912	adherens junction	cellular_component	5	1	90	10	4725	0.175105
GO:0007605	sensory perception of sound	biological_process	9	1	90	10	4725	0.175105
GO:0071347	cellular response to interleukin-1	biological_process	8	1	90	10	4725	0.175105
GO:0035023	regulation of Rho protein signal transduction	biological_process	11	2	90	40	4725	0.176357
GO:0003714	transcription corepressor activity	molecular_function	6	2	90	40	4725	0.176357
GO:0005654	nucleoplasm	cellular_component	11	15	90	617	4725	0.189938
GO:0004003	ATP-dependent DNA helicase activity	molecular_function	11	1	90	11	4725	0.19085
GO:0070064	proline-rich region binding	molecular_function	5	1	90	11	4725	0.19085
GO:0035035	histone acetyltransferase binding	molecular_function	6	1	90	11	4725	0.19085
GO:0043401	steroid hormone mediated signaling pathway	biological_process	8	1	90	11	4725	0.19085
GO:0045773	positive regulation of axon extension	biological_process	10	1	90	11	4725	0.19085
GO:0070373	negative regulation of ERK1 and ERK2 cascade	biological_process	12	1	90	11	4725	0.19085
GO:0043406	positive regulation of MAP kinase activity	biological_process	13	1	90	11	4725	0.19085
GO:0071479	cellular response to ionizing radiation	biological_process	7	1	90	11	4725	0.19085
GO:0016235	aggresome	cellular_component	8	1	90	11	4725	0.19085
GO:0010718	positive regulation of epithelial to mesenchymal transition	biological_process	12	1	90	11	4725	0.19085
GO:0003707	steroid hormone receptor activity	molecular_function	5	1	90	11	4725	0.19085
GO:0051603	proteolysis involved in cellular protein catabolic process	biological_process	8	1	90	11	4725	0.19085
GO:0001942	hair follicle development	biological_process	10	1	90	11	4725	0.19085
GO:0001046	core promoter sequence-specific DNA binding	molecular_function	10	1	90	11	4725	0.19085
GO:0008344	adult locomotory behavior	biological_process	5	1	90	11	4725	0.19085
GO:0050679	positive regulation of epithelial cell proliferation	biological_process	6	1	90	11	4725	0.19085
GO:0035556	intracellular signal transduction	biological_process	7	4	90	121	4725	0.198327
GO:0032467	positive regulation of cytokinesis	biological_process	9	1	90	12	4725	0.206299
GO:0000077	DNA damage checkpoint	biological_process	9	1	90	12	4725	0.206299
GO:0070059	intrinsic apoptotic signaling pathway in response to endoplasmic reticulum stress	biological_process	9	1	90	12	4725	0.206299
GO:0002062	chondrocyte differentiation	biological_process	7	1	90	12	4725	0.206299
GO:0019894	kinesin binding	molecular_function	6	1	90	12	4725	0.206299
GO:0045599	negative regulation of fat cell differentiation	biological_process	9	1	90	12	4725	0.206299
GO:0030971	receptor tyrosine kinase binding	molecular_function	6	1	90	12	4725	0.206299
GO:0005913	cell-cell adherens junction	cellular_component	5	1	90	12	4725	0.206299
GO:0008219	cell death	biological_process	5	1	90	12	4725	0.206299
GO:0031941	filamentous actin	cellular_component	12	1	90	12	4725	0.206299
GO:0001503	ossification	biological_process	5	1	90	12	4725	0.206299
GO:0006378	mRNA polyadenylation	biological_process	12	1	90	12	4725	0.206299
GO:0071407	cellular response to organic cyclic compound	biological_process	7	1	90	12	4725	0.206299
GO:0004842	ubiquitin-protein transferase activity	molecular_function	6	3	90	85	4725	0.219649
GO:0000381	regulation of alternative mRNA splicing, via spliceosome	biological_process	13	1	90	13	4725	0.221455
GO:0008092	cytoskeletal protein binding	molecular_function	5	1	90	13	4725	0.221455
GO:0048015	phosphatidylinositol-mediated signaling	biological_process	9	1	90	13	4725	0.221455
GO:0014068	positive regulation of phosphatidylinositol 3-kinase signaling	biological_process	12	1	90	13	4725	0.221455
GO:0007156	homophilic cell adhesion via plasma membrane adhesion molecules	biological_process	7	1	90	13	4725	0.221455
GO:0030097	hemopoiesis	biological_process	6	1	90	13	4725	0.221455
GO:0030032	lamellipodium assembly	biological_process	7	1	90	13	4725	0.221455
GO:0035690	cellular response to drug	biological_process	6	1	90	13	4725	0.221455
GO:0021766	hippocampus development	biological_process	13	1	90	13	4725	0.221455
GO:0070536	protein K63-linked deubiquitination	biological_process	11	1	90	13	4725	0.221455
GO:0017048	Rho GTPase binding	molecular_function	9	1	90	13	4725	0.221455
GO:0032947	protein complex scaffold	molecular_function	4	1	90	13	4725	0.221455
GO:0051259	protein oligomerization	biological_process	8	1	90	13	4725	0.221455
GO:0000993	RNA polymerase II core binding	molecular_function	7	1	90	13	4725	0.221455
GO:0071356	cellular response to tumor necrosis factor	biological_process	8	1	90	13	4725	0.221455
GO:0007155	cell adhesion	biological_process	4	2	90	47	4725	0.225161
GO:0016021	integral component of membrane	cellular_component	6	15	90	640	4725	0.230838
GO:0051087	chaperone binding	molecular_function	5	1	90	14	4725	0.236326
GO:0030175	filopodium	cellular_component	6	1	90	14	4725	0.236326
GO:0051897	positive regulation of protein kinase B signaling	biological_process	10	1	90	14	4725	0.236326
GO:0030139	endocytic vesicle	cellular_component	11	1	90	14	4725	0.236326
GO:0030182	neuron differentiation	biological_process	9	1	90	14	4725	0.236326
GO:0043010	camera-type eye development	biological_process	10	1	90	14	4725	0.236326
GO:0008270	zinc ion binding	molecular_function	8	9	90	357	4725	0.237506
GO:0042787	protein ubiquitination involved in ubiquitin-dependent protein catabolic process	biological_process	10	2	90	50	4725	0.246413
GO:0001822	kidney development	biological_process	9	1	90	15	4725	0.250915
GO:0001889	liver development	biological_process	8	1	90	15	4725	0.250915
GO:0001228	transcriptional activator activity, RNA polymerase II transcription regulatory region sequence-specific binding	molecular_function	6	1	90	15	4725	0.250915
GO:0010951	negative regulation of endopeptidase activity	biological_process	11	1	90	15	4725	0.250915
GO:0031647	regulation of protein stability	biological_process	9	1	90	15	4725	0.250915
GO:0000781	chromosome, telomeric region	cellular_component	12	1	90	15	4725	0.250915
GO:0005905	clathrin-coated pit	cellular_component	5	1	90	15	4725	0.250915
GO:0000187	activation of MAPK activity	biological_process	13	1	90	15	4725	0.250915
GO:0004197	cysteine-type endopeptidase activity	molecular_function	8	1	90	15	4725	0.250915
GO:0050885	neuromuscular process controlling balance	biological_process	8	1	90	15	4725	0.250915
GO:0006469	negative regulation of protein kinase activity	biological_process	11	1	90	15	4725	0.250915
GO:0005856	cytoskeleton	cellular_component	9	3	90	93	4725	0.260467
GO:0006974	cellular response to DNA damage stimulus	biological_process	6	2	90	52	4725	0.26063
GO:0001077	transcriptional activator activity, RNA polymerase II core promoter proximal region sequence-specific binding	molecular_function	7	2	90	52	4725	0.26063
GO:0051607	defense response to virus	biological_process	5	1	90	16	4725	0.265229
GO:0031201	SNARE complex	cellular_component	9	1	90	16	4725	0.265229
GO:0009411	response to UV	biological_process	7	1	90	16	4725	0.265229
GO:0019900	kinase binding	molecular_function	6	1	90	16	4725	0.265229
GO:0045184	establishment of protein localization	biological_process	6	1	90	16	4725	0.265229
GO:0055114	oxidation-reduction process	biological_process	5	4	90	138	4725	0.268135
GO:0031252	cell leading edge	cellular_component	5	1	90	17	4725	0.279272
GO:0010506	regulation of autophagy	biological_process	7	1	90	17	4725	0.279272
GO:0007015	actin filament organization	biological_process	7	1	90	17	4725	0.279272
GO:0046332	SMAD binding	molecular_function	5	1	90	17	4725	0.279272
GO:0020037	heme binding	molecular_function	6	1	90	17	4725	0.279272
GO:0034976	response to endoplasmic reticulum stress	biological_process	6	1	90	17	4725	0.279272
GO:0007368	determination of left/right symmetry	biological_process	9	1	90	17	4725	0.279272
GO:0048813	dendrite morphogenesis	biological_process	8	1	90	17	4725	0.279272
GO:0006468	protein phosphorylation	biological_process	8	4	90	141	4725	0.280938
GO:0030054	cell junction	cellular_component	3	2	90	55	4725	0.281969
GO:0005524	ATP binding	molecular_function	9	13	90	570	4725	0.286064
GO:0030027	lamellipodium	cellular_component	6	2	90	56	4725	0.289076
GO:0042384	cilium assembly	biological_process	6	2	90	56	4725	0.289076
GO:0045111	intermediate filament cytoskeleton	cellular_component	10	1	90	18	4725	0.29305
GO:0071230	cellular response to amino acid stimulus	biological_process	7	1	90	18	4725	0.29305
GO:0032869	cellular response to insulin stimulus	biological_process	9	1	90	18	4725	0.29305
GO:0006914	autophagy	biological_process	6	1	90	18	4725	0.29305
GO:0010976	positive regulation of neuron projection development	biological_process	8	1	90	18	4725	0.29305
GO:0007283	spermatogenesis	biological_process	7	2	90	57	4725	0.296176
GO:0006366	transcription from RNA polymerase II promoter	biological_process	11	3	90	100	4725	0.296963
GO:0005881	cytoplasmic microtubule	cellular_component	9	1	90	19	4725	0.306567
GO:0035064	methylated histone binding	molecular_function	6	1	90	19	4725	0.306567
GO:0016337	single organismal cell-cell adhesion	biological_process	6	1	90	19	4725	0.306567
GO:0090263	positive regulation of canonical Wnt signaling pathway	biological_process	11	1	90	19	4725	0.306567
GO:0001047	core promoter binding	molecular_function	9	1	90	19	4725	0.306567
GO:0005887	integral component of plasma membrane	cellular_component	7	3	90	102	4725	0.307464
GO:0001701	in utero embryonic development	biological_process	9	2	90	59	4725	0.310345
GO:0018105	peptidyl-serine phosphorylation	biological_process	9	2	90	60	4725	0.31741
GO:0030509	BMP signaling pathway	biological_process	13	1	90	20	4725	0.319828
GO:0019905	syntaxin binding	molecular_function	6	1	90	20	4725	0.319828
GO:0001934	positive regulation of protein phosphorylation	biological_process	10	1	90	20	4725	0.319828
GO:0032092	positive regulation of protein binding	biological_process	7	1	90	20	4725	0.319828
GO:0030198	extracellular matrix organization	biological_process	6	1	90	20	4725	0.319828
GO:0042995	cell projection	cellular_component	5	1	90	20	4725	0.319828
GO:0045444	fat cell differentiation	biological_process	7	1	90	20	4725	0.319828
GO:0045766	positive regulation of angiogenesis	biological_process	12	1	90	20	4725	0.319828
GO:0051301	cell division	biological_process	5	2	90	61	4725	0.324459
GO:0005667	transcription factor complex	cellular_component	7	2	90	61	4725	0.324459
GO:0004672	protein kinase activity	molecular_function	7	2	90	62	4725	0.331491
GO:0007160	cell-matrix adhesion	biological_process	6	1	90	21	4725	0.332839
GO:0005819	spindle	cellular_component	9	1	90	21	4725	0.332839
GO:0006511	ubiquitin-dependent protein catabolic process	biological_process	9	2	90	64	4725	0.345493
GO:0045454	cell redox homeostasis	biological_process	6	1	90	22	4725	0.345604
GO:0005643	nuclear pore	cellular_component	12	1	90	22	4725	0.345604
GO:0070374	positive regulation of ERK1 and ERK2 cascade	biological_process	12	1	90	22	4725	0.345604
GO:0042593	glucose homeostasis	biological_process	8	1	90	23	4725	0.358127
GO:0005975	carbohydrate metabolic process	biological_process	5	1	90	23	4725	0.358127
GO:0090305	nucleic acid phosphodiester bond hydrolysis	biological_process	8	1	90	23	4725	0.358127
GO:0006955	immune response	biological_process	4	1	90	23	4725	0.358127
GO:0032436	positive regulation of proteasomal ubiquitin-dependent protein catabolic process	biological_process	12	1	90	24	4725	0.370413
GO:0023014	signal transduction by protein phosphorylation	biological_process	8	1	90	24	4725	0.370413
GO:0032587	ruffle membrane	cellular_component	8	1	90	24	4725	0.370413
GO:0000226	microtubule cytoskeleton organization	biological_process	6	1	90	24	4725	0.370413
GO:0010501	RNA secondary structure unwinding	biological_process	9	1	90	24	4725	0.370413
GO:0042383	sarcolemma	cellular_component	6	1	90	24	4725	0.370413
GO:0005923	bicellular tight junction	cellular_component	6	1	90	24	4725	0.370413
GO:0030334	regulation of cell migration	biological_process	8	1	90	24	4725	0.370413
GO:0030165	PDZ domain binding	molecular_function	6	1	90	24	4725	0.370413
GO:0003682	chromatin binding	molecular_function	4	3	90	116	4725	0.381006
GO:0002039	p53 binding	molecular_function	5	1	90	25	4725	0.382466
GO:0007186	G-protein coupled receptor signaling pathway	biological_process	8	1	90	25	4725	0.382466
GO:0008013	beta-catenin binding	molecular_function	5	1	90	25	4725	0.382466
GO:0006396	RNA processing	biological_process	9	1	90	26	4725	0.394291
GO:0005085	guanyl-nucleotide exchange factor activity	molecular_function	3	1	90	26	4725	0.394291
GO:0000932	cytoplasmic mRNA processing body	cellular_component	10	1	90	26	4725	0.394291
GO:0002230	positive regulation of defense response to virus by host	biological_process	8	1	90	26	4725	0.394291
GO:0043005	neuron projection	cellular_component	6	1	90	27	4725	0.405892
GO:0001726	ruffle	cellular_component	6	1	90	27	4725	0.405892
GO:0003697	single-stranded DNA binding	molecular_function	8	1	90	27	4725	0.405892
GO:0000724	double-strand break repair via homologous recombination	biological_process	11	1	90	27	4725	0.405892
GO:0005506	iron ion binding	molecular_function	8	1	90	27	4725	0.405892
GO:0008201	heparin binding	molecular_function	6	1	90	27	4725	0.405892
GO:0004674	protein serine/threonine kinase activity	molecular_function	8	3	90	122	4725	0.412143
GO:0000785	chromatin	cellular_component	11	1	90	28	4725	0.417274
GO:0003725	double-stranded RNA binding	molecular_function	7	1	90	29	4725	0.428439
GO:0045121	membrane raft	cellular_component	5	1	90	29	4725	0.428439
GO:0043130	ubiquitin binding	molecular_function	6	1	90	29	4725	0.428439
GO:0016491	oxidoreductase activity	molecular_function	4	1	90	29	4725	0.428439
GO:0007179	transforming growth factor beta receptor signaling pathway	biological_process	10	1	90	29	4725	0.428439
GO:0035264	multicellular organism growth	biological_process	5	1	90	29	4725	0.428439
GO:0001649	osteoblast differentiation	biological_process	7	1	90	30	4725	0.439394
GO:0071013	catalytic step 2 spliceosome	cellular_component	9	1	90	30	4725	0.439394
GO:0012505	endomembrane system	cellular_component	5	1	90	30	4725	0.439394
GO:0016363	nuclear matrix	cellular_component	11	1	90	30	4725	0.439394
GO:0051260	protein homooligomerization	biological_process	9	1	90	30	4725	0.439394
GO:0003677	DNA binding	molecular_function	6	5	90	228	4725	0.440007
GO:0008285	negative regulation of cell proliferation	biological_process	5	2	90	78	4725	0.440271
GO:0005737	cytoplasm	cellular_component	7	22	90	1104	4725	0.444435
GO:0016055	Wnt signaling pathway	biological_process	8	1	90	31	4725	0.45014
GO:0016605	PML body	cellular_component	14	1	90	31	4725	0.45014
GO:0014069	postsynaptic density	cellular_component	4	1	90	31	4725	0.45014
GO:0007399	nervous system development	biological_process	7	1	90	31	4725	0.45014
GO:0004702	receptor signaling protein serine/threonine kinase activity	molecular_function	9	1	90	31	4725	0.45014
GO:0000978	RNA polymerase II core promoter proximal region sequence-specific DNA binding	molecular_function	11	2	90	80	4725	0.453229
GO:0007411	axon guidance	biological_process	7	1	90	32	4725	0.460683
GO:0051015	actin filament binding	molecular_function	7	1	90	32	4725	0.460683
GO:0030036	actin cytoskeleton organization	biological_process	6	1	90	32	4725	0.460683
GO:0006260	DNA replication	biological_process	9	1	90	33	4725	0.471025
GO:0003729	mRNA binding	molecular_function	8	1	90	34	4725	0.481172
GO:0005938	cell cortex	cellular_component	9	1	90	34	4725	0.481172
GO:0046872	metal ion binding	molecular_function	6	7	90	345	4725	0.488856
GO:0036064	ciliary basal body	cellular_component	12	1	90	35	4725	0.491126
GO:0090090	negative regulation of canonical Wnt signaling pathway	biological_process	11	1	90	35	4725	0.491126
GO:0005515	protein binding	molecular_function	4	8	90	398	4725	0.491627
GO:0005759	mitochondrial matrix	cellular_component	11	1	90	36	4725	0.500891
GO:0045202	synapse	cellular_component	3	1	90	36	4725	0.500891
GO:0018108	peptidyl-tyrosine phosphorylation	biological_process	9	1	90	36	4725	0.500891
GO:0045892	negative regulation of transcription, DNA-templated	biological_process	12	2	90	89	4725	0.509377
GO:0045893	positive regulation of transcription, DNA-templated	biological_process	12	2	90	89	4725	0.509377
GO:0042127	regulation of cell proliferation	biological_process	5	1	90	37	4725	0.510471
GO:0001525	angiogenesis	biological_process	10	1	90	38	4725	0.519869
GO:0005089	Rho guanyl-nucleotide exchange factor activity	molecular_function	5	1	90	38	4725	0.519869
GO:0010628	positive regulation of gene expression	biological_process	8	1	90	38	4725	0.519869
GO:0005802	trans-Golgi network	cellular_component	10	1	90	39	4725	0.529088
GO:0000398	mRNA splicing, via spliceosome	biological_process	11	1	90	40	4725	0.538133
GO:0043025	neuronal cell body	cellular_component	6	1	90	40	4725	0.538133
GO:0031410	cytoplasmic vesicle	cellular_component	9	1	90	40	4725	0.538133
GO:0000922	spindle pole	cellular_component	10	1	90	41	4725	0.547005
GO:0000209	protein polyubiquitination	biological_process	11	1	90	41	4725	0.547005
GO:0005509	calcium ion binding	molecular_function	7	3	90	150	4725	0.549192
GO:0016324	apical plasma membrane	cellular_component	6	1	90	42	4725	0.555709
GO:0005622	intracellular	cellular_component	5	3	90	153	4725	0.562792
GO:0016192	vesicle-mediated transport	biological_process	6	1	90	43	4725	0.564248
GO:0045944	positive regulation of transcription from RNA polymerase II promoter	biological_process	13	5	90	262	4725	0.564443
GO:0008360	regulation of cell shape	biological_process	9	1	90	44	4725	0.572624
GO:0007507	heart development	biological_process	8	1	90	44	4725	0.572624
GO:0005768	endosome	cellular_component	9	1	90	44	4725	0.572624
GO:0050821	protein stabilization	biological_process	10	1	90	46	4725	0.588902
GO:0000977	RNA polymerase II regulatory region sequence-specific DNA binding	molecular_function	10	1	90	46	4725	0.588902
GO:0003924	GTPase activity	molecular_function	9	1	90	47	4725	0.596809
GO:0005739	mitochondrion	cellular_component	9	5	90	273	4725	0.601794
GO:0005814	centriole	cellular_component	10	1	90	48	4725	0.604566
GO:0006897	endocytosis	biological_process	7	1	90	49	4725	0.612176
GO:0005813	centrosome	cellular_component	9	3	90	166	4725	0.618824
GO:0016874	ligase activity	molecular_function	4	1	90	50	4725	0.61964
GO:0005794	Golgi apparatus	cellular_component	9	4	90	224	4725	0.624598
GO:0006281	DNA repair	biological_process	9	1	90	52	4725	0.634146
GO:0000981	RNA polymerase II transcription factor activity, sequence-specific DNA binding	molecular_function	5	1	90	53	4725	0.641192
GO:0005730	nucleolus	cellular_component	11	4	90	229	4725	0.642129
GO:0019901	protein kinase binding	molecular_function	7	2	90	115	4725	0.649471
GO:0007264	small GTPase mediated signal transduction	biological_process	8	1	90	55	4725	0.654884
GO:0017137	Rab GTPase binding	molecular_function	9	1	90	55	4725	0.654884
GO:0016020	membrane	cellular_component	3	7	90	403	4725	0.657497
GO:0005769	early endosome	cellular_component	10	1	90	57	4725	0.66806
GO:0003700	transcription factor activity, sequence-specific DNA binding	molecular_function	4	2	90	120	4725	0.672525
GO:0046777	protein autophosphorylation	biological_process	9	1	90	60	4725	0.686895
GO:0043065	positive regulation of apoptotic process	biological_process	9	1	90	60	4725	0.686895
GO:0043231	intracellular membrane-bounded organelle	cellular_component	8	1	90	60	4725	0.686895
GO:0006915	apoptotic process	biological_process	7	1	90	60	4725	0.686895
GO:0019899	enzyme binding	molecular_function	5	1	90	66	4725	0.721453
GO:0008134	transcription factor binding	molecular_function	5	1	90	67	4725	0.726834
GO:0061630	ubiquitin protein ligase activity	molecular_function	7	1	90	68	4725	0.732112
GO:0043234	protein complex	cellular_component	4	1	90	68	4725	0.732112
GO:0000287	magnesium ion binding	molecular_function	7	1	90	73	4725	0.757026
GO:0005525	GTP binding	molecular_function	9	1	90	74	4725	0.761727
GO:0005743	mitochondrial inner membrane	cellular_component	13	1	90	75	4725	0.766338
GO:0008017	microtubule binding	molecular_function	7	1	90	76	4725	0.77086
GO:0043066	negative regulation of apoptotic process	biological_process	9	1	90	77	4725	0.775296
GO:0006355	regulation of transcription, DNA-templated	biological_process	11	3	90	215	4725	0.785076
GO:0006886	intracellular protein transport	biological_process	7	1	90	83	4725	0.800183
GO:0046982	protein heterodimerization activity	molecular_function	6	1	90	89	4725	0.822341
GO:0005783	endoplasmic reticulum	cellular_component	9	2	90	164	4725	0.826477
GO:0016567	protein ubiquitination	biological_process	10	1	90	91	4725	0.829173
GO:0070062	extracellular exosome	cellular_component	7	9	90	612	4725	0.842003
GO:0003723	RNA binding	molecular_function	6	1	90	102	4725	0.862355
GO:0006351	transcription, DNA-templated	biological_process	10	2	90	195	4725	0.892506
GO:0048471	perinuclear region of cytoplasm	cellular_component	9	1	90	132	4725	0.923827
GO:0003676	nucleic acid binding	molecular_function	5	1	90	133	4725	0.92532
GO:0000166	nucleotide binding	molecular_function	5	1	90	133	4725	0.92532
GO:0007165	signal transduction	biological_process	6	1	90	139	4725	0.933687
GO:0005634	nucleus	cellular_component	9	13	90	961	4725	0.942585
GO:0042803	protein homodimerization activity	molecular_function	6	1	90	165	4725	0.960447
GO:0000122	negative regulation of transcription from RNA polymerase II promoter	biological_process	12	1	90	168	4725	0.962744
GO:0044822	poly(A) RNA binding	molecular_function	7	2	90	372	4725	0.994872
GO:0005829	cytosol	cellular_component	9	2	90	456	4725	0.998935
